# Supplementary material for: C–H cycloamination of N-aryl-2-aminopyridines and N-arylamidines catalyzed by an in situ generated hypervalent iodine(iii) reagent
Source: Royal Society of Chemistry journal article supplement (doi:10.1039/c3cc43784a), 2013-01-01
Supplement: c3cc43784a.pdf [file c3cc43784a.pdf]

*Electronic Supplementary Information (ESI)*

# **C–H cycloamination of *N*-aryl-2-aminopyridines and *N*-arylamidines catalyzed by in situ generated hypervalent iodine(III) reagent**

Yimiao He, Jinbo Huang, Dongdong Liang, Lanying Liu and Qiang Zhu\*

*Guangzhou Institutes of Biomedicine and Health, Chinese Academy of Sciences, 190 Kaiyuan Avenue, Guangzhou 510530, China.*

Email: [zhu\\_qiang@gibh.ac.cn](mailto:zhu_qiang@gibh.ac.cn)

## **Table of Contents**

|                                                                      |     |
|----------------------------------------------------------------------|-----|
| 1. General Information.....                                          | S2  |
| 2. Synthesis and Characterization of Substrates .....                | S2  |
| 2.1 Synthesis of Substrates .....                                    | S2  |
| 2.2 Characterization of Some New Substrates.....                     | S3  |
| 3. General Procedure and Product Characterization .....              | S5  |
| 3.1 General Procedure.....                                           | S5  |
| 3.2 Product Characterization.....                                    | S6  |
| 4. References.....                                                   | S14 |
| 5. Copies of <sup>1</sup> H NMR and <sup>13</sup> C NMR Spectra..... | S14 |

## 1. General Information

Reactions were monitored by using thin-layer chromatography (TLC) on commercial silica gel plates (GF 254). Visualization of the developed plates was performed under UV lights (GF 254 nm). Flash column chromatography was performed on silica gel (200-300 mesh).  $^1\text{H}$  and  $^{13}\text{C}$  NMR spectra were recorded on a Bruker AV400 or 500 MHz spectrometer. Chemical shifts ( $\delta$ ) were reported in ppm referenced to an internal TMS standard or the DMSO- $d_6$  residual peak ( $\delta$  2.50) for  $^1\text{H}$  NMR. Chemical shifts of  $^{13}\text{C}$  NMR were reported relative to  $\text{CDCl}_3$  ( $\delta$  77.0) or  $\text{D}_6\text{-DMSO}$  ( $\delta$  39.5). The following abbreviations were used to describe peak splitting patterns when appropriate: br s = broad singlet, s = singlet, d = doublet, t = triplet, q = quartet, m = multiplet. Coupling constant,  $J$ , was reported in Hertz unit (Hz). High resolution mass spectra (HRMS) were obtained on an ESI-LC-MS/MS spectrometer.

## 2. Synthesis and Characterization of Substrates

### 2.1 Synthesis of Substrates

Substrates **1b-1w** were prepared according to the following general procedure.<sup>1</sup>

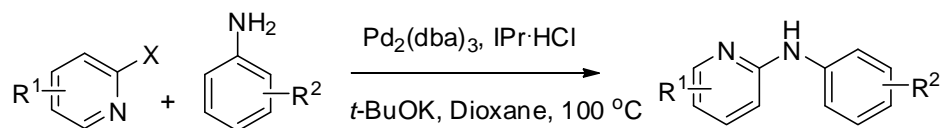

Under an atmosphere of argon, 1,4-dioxane (10 mL),  $t\text{-BuOK}$  (504 mg, 4.5 mmol), 2-halopyridine (3.0 mmol), and aniline (3.6 mmol) were added in turn to a Schlenk tube charging with  $\text{Pd}_2(\text{dba})_3$  (60 mg, 0.06 mmol),  $\text{IPr}\cdot\text{HCl}$  (1,3-bis(2,6-diisopropyl phenyl)imidazolium chloride) (54 mg, 0.12 mmol), and a magnetic stirring bar. The Schlenk tube was placed in a  $100\text{ }^\circ\text{C}$  oil bath and stirred for 2-48 h. The mixture was then allowed to cool to room temperature, then diluted with water, and extracted with ethyl acetate. The extracts were combined, washed with brine, and then dried over anhydrous  $\text{Na}_2\text{SO}_4$ . The solvent was removed under vacuum and the residue was purified by flash chromatography.

Substrates **3a-3d** were prepared according to the following general procedure.<sup>2</sup>

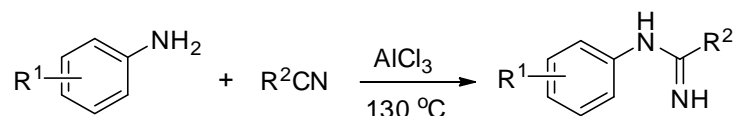

A mixture of  $\text{AlCl}_3$  (11.0 mmol, 1.1 equiv), aniline (11.0 mmol, 1.1 equiv) and carbonitrile (10.0 mmol) was stirred at 130 °C under an inert atmosphere in a sealed tube for about an hour. The hot mixture was poured into a solution of concentrated NaOH solution (40 mL) in mixed water and ice (100 mL) and stirred for about 15 minutes. Then the mixture was extracted with EtOAc (25 mL  $\times$  3). The combined organic layers were washed with brine (30 mL  $\times$  3), dried over anhydrous  $\text{Na}_2\text{SO}_4$ , and evaporated under vacuum. The residue was purified either by column chromatography on silica gel or by recrystallization.

## 2.2 Characterization of Some New Substrates

### *N*-(4-iodophenyl)-2-aminopyridine (**1h**)

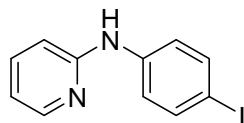

$^1\text{H}$  NMR (400 MHz,  $\text{CDCl}_3$ ):  $\delta$  8.21 (d,  $J$  = 6.4 Hz, 1H), 7.61-7.58 (m, 2H), 7.53-7.49 (m, 1H), 7.16 (d,  $J$  = 8.4 Hz, 2H), 6.82 (d,  $J$  = 8.4 Hz, 1H), 6.78-6.75 (m, 1H), 6.66 (br s, 1H);  $^{13}\text{C}$  NMR (125 MHz,  $\text{CDCl}_3$ ):  $\delta$  155.4, 148.2, 140.4, 138.0, 137.7, 121.7, 115.4, 108.8, 84.7.

### *N*-(4-(2-(trimethylsilyl)ethynyl)phenyl)-2-aminopyridine (**1i**)

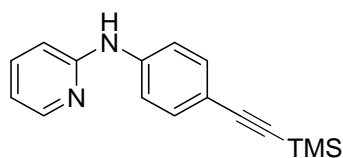

$^1\text{H}$  NMR (400 MHz,  $\text{CDCl}_3$ ):  $\delta$  8.23 (d,  $J$  = 8.0 Hz, 1H), 7.55-7.50 (m, 1H), 7.42 (d,  $J$  = 8.8 Hz, 2H), 7.30 (d,  $J$  = 8.8 Hz, 2H), 6.87 (d,  $J$  = 8.0 Hz, 1H), 6.78 (t,  $J$  = 5.6 Hz, 1H), 6.61 (br s, 1H), 0.25 (s, 9H);  $^{13}\text{C}$  NMR (125 MHz,  $\text{CDCl}_3$ ):  $\delta$  155.1, 148.4, 140.9, 137.7, 133.1, 118.6, 116.4, 115.7, 109.2, 105.3, 92.9.

### *N*-(2-nitrophenyl)-2-aminopyridine (**1n**)

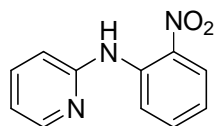

$^1\text{H}$  NMR (400 MHz,  $\text{CDCl}_3$ ):  $\delta$  10.15 (br s, 1H), 8.75 (d,  $J = 7.6$  Hz, 1H), 8.35 (t,  $J = 4.4$  Hz, 1H), 8.23 (d,  $J = 6.8$  Hz, 1H), 7.84 (t,  $J = 5.6$  Hz, 1H), 7.64 (t,  $J = 5.6$  Hz, 1H), 7.55 (d,  $J = 5.6$  Hz, 1H), 7.21 (d,  $J = 5.6$  Hz, 1H), 6.94 (t,  $J = 4.4$  Hz, 1H);  $^{13}\text{C}$  NMR (125 MHz,  $\text{CDCl}_3$ ):  $\delta$  153.5, 147.9, 138.9, 138.0, 135.6, 129.0, 126.2, 122.5, 119.6, 117.8, 113.8.

### 3-fluoro-N-phenyl-2-aminopyridine (1r)

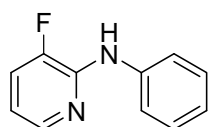

$^1\text{H}$  NMR (400 MHz,  $\text{CDCl}_3$ ):  $\delta$  8.01 (d,  $J = 7.6$  Hz, 1H), 7.66 (d,  $J = 7.6$  Hz, 2H), 7.33 (t,  $J = 5.6$  Hz, 2H), 7.30-7.25 (m, 1H), 7.04 (t,  $J = 7.2$  Hz, 1H), 6.72 (d,  $J = 3.6$  Hz, 1H), 6.61 (br s, 1H);  $^{13}\text{C}$  NMR (125 MHz,  $\text{CDCl}_3$ ):  $\delta$  148.0, 145.9, 145.4, 145.3, 142.6, 142.5, 139.6, 128.9, 122.3, 120.9, 120.8, 119.1, 114.4.

### 3-chloro-N-phenyl-2-aminopyridine (1s)

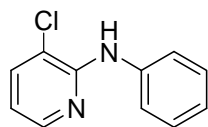

$^1\text{H}$  NMR (400 MHz,  $\text{CDCl}_3$ ):  $\delta$  8.13 (d,  $J = 4.0$  Hz, 1H), 7.63 (d,  $J = 7.6$  Hz, 2H), 7.57 (d,  $J = 7.6$  Hz, 1H), 7.34 (d,  $J = 8.4$  Hz, 2H), 7.05 (t,  $J = 7.2$  Hz, 1H), 6.97 (br s, 1H), 6.70 (d,  $J = 7.6$  Hz, 1H);  $^{13}\text{C}$  NMR (100 MHz,  $\text{CDCl}_3$ ):  $\delta$  151.4, 145.8, 139.8, 136.6, 128.9, 122.8, 120.0, 116.1, 115.2.

### ethyl 2-(phenylamino)pyridine-3-carboxylate (1t)

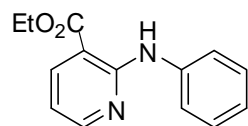

$^1\text{H}$  NMR (400 MHz,  $\text{CDCl}_3$ ):  $\delta$  10.20 (br s, 1H), 8.38-8.36 (m, 1H), 8.26-8.23 (m, 1H), 7.70 (t,  $J = 7.6$  Hz, 2H), 7.36-7.32 (m, 2H), 7.05 (t,  $J = 7.6$  Hz, 1H), 6.73-6.70 (m, 1H), 4.40 (t,  $J = 7.2$  Hz, 2H), 1.42 (t,  $J = 7.2$  Hz, 3H);  $^{13}\text{C}$  NMR (125 MHz,  $\text{CDCl}_3$ ):  $\delta$  167.5, 156.2, 140.1, 139.7, 133.0, 128.8, 122.7, 120.8, 113.2, 107.2, 61.2, 14.2.

### 4-(trifluoromethyl)-*N*-phenyl-2-aminopyridine (**1u**)

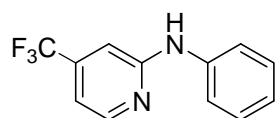

$^1\text{H}$  NMR (400 MHz, MeOD):  $\delta$  8.28 (d,  $J$  = 5.2 Hz, 1H), 7.58-7.56 (m, 2H), 7.30 (t,  $J$  = 5.2 Hz, 2H), 7.02-6.99 (m, 2H), 6.90 (t,  $J$  = 4.8 Hz, 1H), 6.76 (br s, 1H);  $^{13}\text{C}$  NMR (125 MHz,  $\text{CDCl}_3$ ):  $\delta$  156.9, 156.8, 149.6, 140.4, 140.1, 139.9, 139.6, 139.4, 139.3, 129.5, 126.1, 124.0, 123.8, 121.8, 121.3, 121.1, 110.0, 103.7, 103.6.

## 3. General Procedure and Product Characterization

### 3.1 General Procedure

Substrates **2a-2w** were afforded according to the following procedure

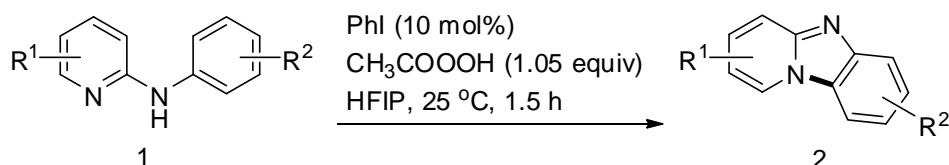

A tube was charged with **1** (0.2 mmol), PhI (0.02 mmol), peracetic acid (41-45 wt %, 34  $\mu\text{L}$ ), and 1,1,1,3,3,3-hexafluoro-2-propanol (2 mL). The reaction mixture was stirred at room temperature for 1.5 h. The reaction mixture was quenched with saturated solution of sodium thiosulphate and extracted with ethyl acetate. The organic layer was washed with brine, and dried over anhydrous  $\text{Na}_2\text{SO}_4$ . The organic extracts were filtered and concentrated under reduced pressure. Purification by column chromatography on silica gel afforded the pure product.

Substrates **4a-4d** were afforded according to the following procedure

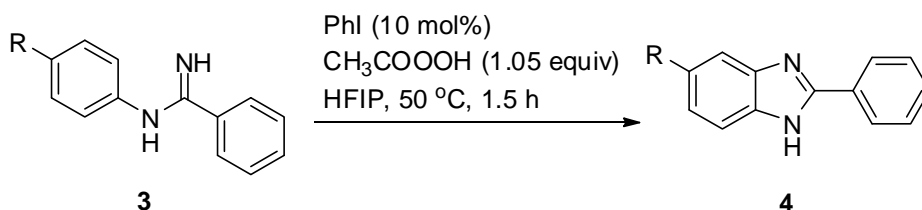

A tube was charged with **3** (0.2 mmol), PhI (0.02 mmol), peracetic acid (41-45 wt %, 34  $\mu\text{L}$ ), and 1,1,1,3,3,3-Hexafluoro-2-propanol (2 mL). The reaction mixture was

stirred at 50 °C for 1.5 h. The reaction mixture was quenched with saturated solution of sodium thiosulphate and extracted with ethyl acetate. The organic layer was washed with brine, dried over anhydrous Na<sub>2</sub>SO<sub>4</sub>. The organic extracts were filtered and concentrated under reduced pressure. Purification by column chromatography on silica gel afforded the pure product.

### 3.2 Product Characterization

#### Pyrido[1,2-*a*]benzimidazole (2a)

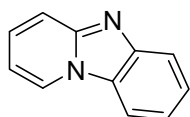

Yield: 91%. mp 181-182 °C, white solid. <sup>1</sup>H NMR (400 MHz, D<sub>6</sub>-DMSO): δ 9.08 (d, *J* = 6.8 Hz, 1H), 8.30 (d, *J* = 8.4 Hz, 1H), 7.80 (d, *J* = 8.0 Hz, 1H), 7.66 (d, *J* = 9.2 Hz, 1H), 7.57-7.48 (m, 2H), 7.39-7.35 (m, 1H), 7.00-6.98 (m, 1H); <sup>13</sup>C NMR (125 MHz, D<sub>6</sub>-DMSO): δ 148.0, 144.3, 130.4, 128.9, 127.3, 125.6, 120.8, 119.2, 117.2, 112.3, 110.5; HRMS (ESI): Exact mass calcd for C<sub>11</sub>H<sub>9</sub>N<sub>2</sub> [M+H]<sup>+</sup>, 169.0760; Found :169.0765.

#### 8-methoxy pyrido[1,2-*a*]benzimidazole (2b)

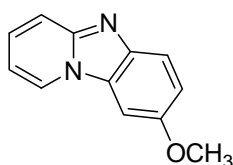

Yield: 85%. mp 155-156 °C, dark solid. <sup>1</sup>H NMR (400 MHz, D<sub>6</sub>-DMSO): δ 8.99 (d, *J* = 6.8 Hz, 1H), 7.90 (d, *J* = 2.4 Hz, 1H), 7.70 (d, *J* = 8.8 Hz, 1H), 7.59 (d, *J* = 9.2 Hz, 1H), 7.46-7.42 (m, 1H), 7.14-7.12 (m, 1H), 6.95-6.92 (m, 1H), 3.88 (s, 3H); <sup>13</sup>C NMR (100 MHz, D<sub>6</sub>-DMSO): δ 154.6, 147.1, 138.4, 128.7, 128.4, 126.3, 119.4, 116.9, 115.4, 109.6, 94.6, 55.7; HRMS (ESI): Exact mass calcd for C<sub>12</sub>H<sub>11</sub>N<sub>2</sub>O [M+H]<sup>+</sup>, 199.0866; Found: 199.0870.

#### 8-methylpyrido[1,2-*a*]benzimidazole (2c)

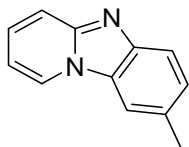

Yield: 93%. mp 83-85 °C, off-white solid.  $^1\text{H}$  NMR (400 MHz,  $\text{D}_6\text{-DMSO}$ ):  $\delta$  8.98 (d,  $J$  = 6.8 Hz, 1H), 8.10 (s, 1H), 7.68 (d,  $J$  = 8.4 Hz, 1H), 7.61 (d,  $J$  = 9.2 Hz, 1H), 7.52-7.47 (m, 1H), 7.34-7.32 (m, 1H), 6.97-6.93 (m, 1H), 2.53 (s, 3H);  $^{13}\text{C}$  NMR (125 MHz,  $\text{D}_6\text{-DMSO}$ ):  $\delta$  147.5, 142.1, 130.0, 129.5, 128.7, 127.0, 126.7, 118.6, 117.0, 111.3, 110.1, 21.4; HRMS (ESI): Exact mass calcd for  $\text{C}_{12}\text{H}_{11}\text{N}_2$   $[\text{M}+\text{H}]^+$ , 183.0917; Found: 183.0923.

### 8-(*tert*-butyl)pyrido[1,2-*a*]benzimidazole (2d)

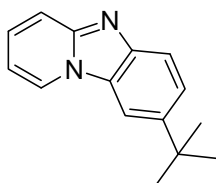

Yield: 94%. mp 90-92 °C, pale yellow solid.  $^1\text{H}$  NMR (400 MHz,  $\text{D}_6\text{-DMSO}$ ):  $\delta$  9.12 (d,  $J$  = 6.8 Hz, 1H), 8.29 (d,  $J$  = 1.6 Hz, 1H), 7.71 (d,  $J$  = 8.8 Hz, 1H), 7.63- 7.57(m, 2H), 7.52-7.48 (m, 1H), 6.97-6.93 (m, 1H), 1.41 (s, 9H);  $^{13}\text{C}$  NMR (125 MHz,  $\text{D}_6\text{-DMSO}$ ):  $\delta$  147.8, 143.8, 142.0, 129.4, 128.4, 126.9, 123.4, 118.3, 116.9, 109.8, 107.9, 34.8, 31.6; HRMS (ESI): Exact mass calcd for  $\text{C}_{15}\text{H}_{17}\text{N}_2$   $[\text{M}+\text{H}]^+$ , 225.1386; Found: 225.1391.

### 8-fluoropyrido[1,2-*a*]benzimidazole (2e)

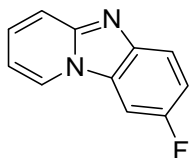

Yield: 94%. mp 182-183 °C, white solid.  $^1\text{H}$  NMR (400 MHz,  $\text{D}_6\text{-DMSO}$ ):  $\delta$  9.00 (d,  $J$  = 6.8 Hz, 1H), 8.26-8.23 (m, 1H), 7.83-7.80 (m, 1H), 7.65 (d,  $J$  = 9.2 Hz, 1H), 7.56-7.51 (m, 1H), 7.40-7.35 (m, 1H), 7.01-6.98 (m, 1H);  $^{13}\text{C}$  NMR (125 MHz,  $\text{D}_6\text{-DMSO}$ ):  $\delta$  158.1, 156.2, 148.5, 140.5, 130.0, 128.4, 128.2, 127.0, 120.1, 120.0, 117.2, 113.9, 113.7, 110.4, 98.7, 98.5; HRMS (ESI): Exact mass calcd for  $\text{C}_{11}\text{H}_8\text{FN}_2$   $[\text{M}+\text{H}]^+$ , 187.0666; Found: 187.0665.

### 8-chloropyrido[1,2-*a*]benzimidazole (2f)

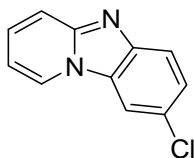

Yield: 99%. mp 110-112 °C, white solid.  $^1\text{H}$  NMR (400 MHz,  $\text{CDCl}_3$ ):  $\delta$  8.36 (d,  $J$  = 6.8 Hz, 1H), 7.89 (s, 1H), 7.85 (d,  $J$  = 8.8 Hz, 1H), 7.68 (d,  $J$  = 9.2 Hz, 1H), 7.50 (d,  $J$  =

2.0 Hz, 1H), 7.48-7.42 (m, 1H), 6.87 (t,  $J = 6.4$  Hz, 1H);  $^{13}\text{C}$  NMR (125 MHz,  $\text{CDCl}_3$ ):  $\delta$  149.0, 143.0, 129.6, 129.0, 126.6, 126.4, 125.0, 120.8, 118.2, 110.8, 110.5; HRMS (ESI): Exact mass calcd for  $\text{C}_{11}\text{H}_8\text{ClN}_2$   $[\text{M}+\text{H}]^+$ , 203.0371; Found: 203.0369.

### 8-bromopyrido[1,2-*a*]benzimidazole (2g)

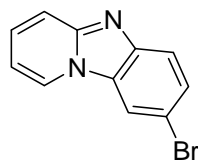

Yield: 91%. mp 151-153 °C, off-white solid.  $^1\text{H}$  NMR (400 MHz,  $\text{D}_6$ -DMSO):  $\delta$  9.05 (d,  $J = 6.8$  Hz, 1H), 8.62 (d,  $J = 2.0$  Hz, 1H), 7.73 (d,  $J = 8.8$  Hz, 1H), 7.65 (d,  $J = 9.2$  Hz, 1H), 7.61-7.54 (m, 2H), 7.02-6.99 (m, 1H);  $^{13}\text{C}$  NMR (100 MHz,  $\text{CDCl}_3$ ):  $\delta$  149.0, 143.6, 129.6, 129.0, 125.1, 121.3, 118.4, 113.9, 113.6, 110.8; HRMS (ESI): Exact mass calcd for  $\text{C}_{11}\text{H}_8\text{BrN}_2$   $[\text{M}+\text{H}]^+$ , 246.9865; Found: 246.9873.

### 8-iodopyrido[1,2-*a*]benzimidazole (2h)

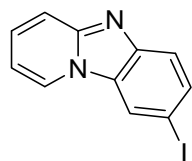

Follow the general procedure, yield: 39%. mp 181-182 °C, off-white solid. The yield of **2h** was improved significantly to 91% by slowly addition of a solution of peracetic acid (34  $\mu\text{L}$ ) in HFIP (1.0 mL) during 5 minutes to a HFIP (1.0 mL) solution of *N*-(4-iodophenyl)-2-aminopyridine.  $^1\text{H}$  NMR (400 MHz,  $\text{CDCl}_3$ ):  $\delta$  8.38 (d,  $J = 6.8$  Hz, 1H), 8.25(s, 1H), 7.80-7.77 (m, 1H), 7.71-7.68 (m, 1H), 7.48-7.43 (m, 1H), 6.88 (t,  $J = 6.8$  Hz, 1H);  $^{13}\text{C}$  NMR (125 MHz,  $\text{CDCl}_3$ ):  $\delta$  148.5, 143.8, 134.4, 130.1, 129.9, 125.0, 121.6, 119.5, 118.1, 110.9, 83.3; HRMS (ESI): Exact mass calcd for  $\text{C}_{11}\text{H}_8\text{IN}_2$   $[\text{M}+\text{H}]^+$ , 294.9727; Found: 294.9725.

### 8-(trimethylsilyl)ethynylpyrido[1,2-*a*]benzimidazole (2i)

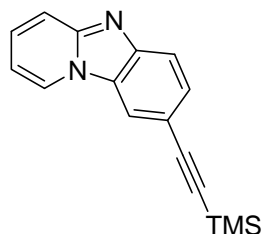

Yield: 78%. mp 209-210 °C, pale yellow solid.  $^1\text{H}$  NMR (400 MHz,  $\text{CDCl}_3$ ):  $\delta$  8.41 (d,  $J = 6.8$  Hz, 1H), 8.05 (s, 1H), 7.83 (d,  $J = 8.4$  Hz, 1H), 7.69 (d,  $J = 9.2$  Hz, 1H), 7.64-7.61 (m, 1H), 7.48-7.44 (m, 1H), 6.89 (t,  $J = 6.8$  Hz, 1H), 0.29 (s, 9H);  $^{13}\text{C}$  NMR (125 MHz,  $\text{CDCl}_3$ ):  $\delta$  149.5, 144.6, 130.0, 129.8, 128.3, 125.2, 119.7, 118.2, 115.5,



114.3, 110.9, 105.7, 93.6; HRMS (ESI): Exact mass calcd for  $C_{16}H_{16}N_2Si[M+H]^+$ , 265.1156; Found: 265.1154.

### 8-nitropyrido[1,2-*a*]benzimidazole (2j)

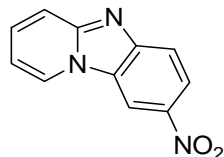

Yield: 97%. mp 275-276 °C, dark solid.  $^1H$  NMR (400 MHz,  $CDCl_3$ ):  $\delta$  8.92(s, 1H), 8.60 (d,  $J = 6.8$  Hz, 1H), 8.47-8.44 (m, 1H), 7.96 (d,  $J = 9.2$  Hz, 1H), 7.80 (d,  $J = 9.2$  Hz, 1H), 7.64 (t,  $J = 7.2$  Hz, 1H), 7.06 (t,  $J = 6.4$  Hz, 1H);  $^{13}C$  NMR (125 MHz,  $CDCl_3$ ):  $\delta$  152.2, 148.9, 141.7, 132.0, 128.0, 125.8, 121.4, 119.8, 118.7, 112.1, 108.0; HRMS (ESI): Exact mass calcd for  $C_{11}H_7N_3O_2[M+H]^+$ , 214.0611; Found: 214.0614.

### 7-chloropyrido[1,2-*a*]benzimidazole (2k)

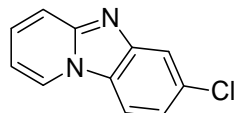

Yield: 44%. mp 209-210 °C, off-white solid.  $^1H$  NMR (400 MHz,  $D_6$ -DMSO):  $\delta$  9.09 (d,  $J = 6.8$  Hz, 1H), 8.34 (d,  $J = 8.8$  Hz, 1H), 7.84 (s, 1H), 7.67 (d,  $J = 8.8$  Hz, 1H), 7.60 (t,  $J = 6.8$  Hz, 1H), 7.39-7.37 (m, 1H), 7.04 (t,  $J = 6.8$  Hz, 1H);  $^{13}C$  NMR (125 MHz,  $D_6$ -DMSO):  $\delta$  148.9, 144.8, 130.9, 129.8, 127.5, 127.3, 120.6, 118.1, 116.9, 113.5, 110.9; HRMS (ESI): Exact mass calcd for  $C_{11}H_8ClN_2[M+H]^+$ , 203.0371; Found: 203.0370.

### 9-chloropyrido[1,2-*a*]benzimidazole (2k')

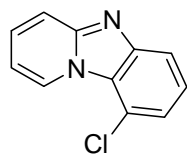

Yield: 44%. mp 225-226 °C, off-white solid.  $^1H$  NMR (400 MHz,  $D_6$ -DMSO):  $\delta$  9.36 (d,  $J = 6.8$  Hz, 1H), 7.79-7.77 (m, 1H), 7.71 (d,  $J = 9.2$  Hz, 1H), 7.63-7.59 (m, 1H), 7.48 (t,  $J = 8.0$  Hz, 1H), 7.41-7.39 (m, 1H), 7.06-7.02 (m, 1H);  $^{13}C$  NMR (125 MHz,  $D_6$ -DMSO):  $\delta$  148.6, 145.9, 130.7, 127.9, 125.9, 124.3, 121.8, 118.2, 117.5, 117.2, 110.1; HRMS (ESI): Exact mass calcd for  $C_{11}H_8ClN_2[M+H]^+$ , 203.0375; Found: 203.0374.

### 6-methylpyrido[1,2-*a*]benzimidazole (2l)

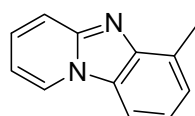

Yield: 79%. mp 139-140 °C, white solid. <sup>1</sup>H NMR (400 MHz, CDCl<sub>3</sub>): δ 8.42 (d, *J* = 6.8 Hz, 1H), 7.76-7.72 (m, 2H), 7.43-7.39 (m, 1H), 7.35-7.28 (m, 2H), 6.86-6.82 (m, 1H), 2.80 (s, 3H); <sup>13</sup>C NMR (100 MHz, CDCl<sub>3</sub>): δ 148.0, 144.0, 130.0, 128.8, 128.3, 125.6, 125.2, 121.0, 118.2, 110.1, 107.7, 17.0; HRMS (ESI): Exact mass calcd for C<sub>12</sub>H<sub>11</sub>N<sub>2</sub> [M+H]<sup>+</sup>, 183.0917; Found: 183.0918.

#### 6-fluoropyrido[1,2-*a*]benzimidazole (2m)

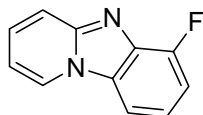

Yield: 71%. mp 207-208 °C, off-white solid. <sup>1</sup>H NMR (400 MHz, D<sub>6</sub>-DMSO): δ 9.10 (d, *J* = 6.8 Hz, 1H), 8.17-8.15 (m, 1H), 7.72 (d, *J* = 9.2 Hz, 1H), 7.64-7.60 (m, 1H), 7.35-7.31 (m, 2H), 7.08-7.04 (m, 1H); <sup>13</sup>C NMR (100 MHz, D<sub>6</sub>-DMSO): δ 154.0, 151.5, 147.9, 132.9, 132.7, 131.4, 131.3, 130.7, 126.9, 120.6, 120.5, 117.0, 110.8, 110.0, 109.9, 108.2, 108.1; HRMS (ESI): Exact mass calcd for C<sub>11</sub>H<sub>8</sub>FN<sub>2</sub> [M+H]<sup>+</sup>, 187.0666; Found: 187.0665.

#### 6-nitropyrido[1,2-*a*]benzimidazole (2n)

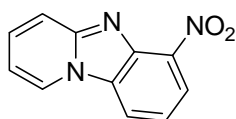

Yield: 88%. mp 300-301 °C, dark solid. <sup>1</sup>H NMR (400 MHz, CDCl<sub>3</sub>): δ 8.55 (d, *J* = 6.8 Hz, 1H), 8.46 (d, *J* = 8.0 Hz, 1H), 8.23 (d, *J* = 8.0 Hz, 1H), 7.94 (d, *J* = 9.6 Hz, 1H), 7.65-7.60 (m, 1H), 7.45 (t, *J* = 8.0 Hz, 1H), 7.05 (t, *J* = 6.8 Hz, 1H); <sup>13</sup>C NMR (125 MHz, CDCl<sub>3</sub>): δ 151.1, 138.6, 138.5, 132.0, 131.8, 125.2, 123.0, 119.4, 119.0, 116.7, 112.3; HRMS (ESI): Exact mass calcd for C<sub>11</sub>H<sub>7</sub>N<sub>3</sub>O<sub>2</sub> [M+H]<sup>+</sup>, 214.0611; Found: 214.0608.

#### 4-methylpyrido[1,2-*a*]benzimidazole (2o)

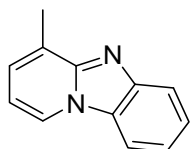

Yield: 85%. mp 135-136 °C, white solid. <sup>1</sup>H NMR (400 MHz, CDCl<sub>3</sub>): δ 8.33 (d, *J* = 6.8 Hz, 1H), 7.98 (d, *J* = 8.0 Hz, 1H), 7.87 (d, *J* = 8.4 Hz, 1H), 7.54-7.50 (m, 1H), 7.38-7.34 (m, 1H), 7.22 (d, *J* = 6.4 Hz, 1H), 6.78 (t, *J* = 6.8 Hz, 1H), 2.71 (s, 3H); <sup>13</sup>C NMR (125 MHz, CDCl<sub>3</sub>): δ 149.0, 144.1, 129.1, 127.7, 127.6, 125.4, 122.8, 120.9, 119.9, 110.4, 110.3, 17.5; HRMS (ESI): Exact mass calcd for C<sub>12</sub>H<sub>11</sub>N<sub>2</sub> [M+H]<sup>+</sup>, 183.0917; Found: 183.0920.

#### 3-methylpyrido[1,2-*a*]benzimidazole (2p)

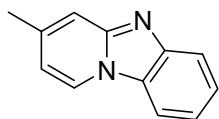

Yield: 97%. mp 163-164 °C, white solid.  $^1\text{H}$  NMR (400 MHz,  $\text{CDCl}_3$ ):  $\delta$  8.32 (d,  $J = 6.8$  Hz, 1H), 7.89 (d,  $J = 8.4$  Hz, 1H), 7.84 (d,  $J = 8.4$  Hz, 1H), 7.49 (t,  $J = 7.6$  Hz, 1H), 7.43 (s, 1H), 7.33 (t,  $J = 7.6$  Hz, 1H), 6.68 (d,  $J = 6.4$  Hz, 1H), 2.47 (s, 3H);  $^{13}\text{C}$  NMR (125 MHz,  $\text{CDCl}_3$ ):  $\delta$  149.1, 144.8, 140.7, 128.7, 125.4, 124.2, 120.5, 119.6, 116.0, 113.1, 110.1, 21.9; HRMS (ESI): Exact mass calcd for  $\text{C}_{12}\text{H}_{11}\text{N}_2$   $[\text{M}+\text{H}]^+$ , 183.0917; Found: 183.0919.

#### 1,8-dimethylpyrido[1,2-a]benzimidazole (2q)

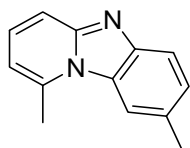

Yield: 94%. mp 118-120 °C, white solid.  $^1\text{H}$  NMR (400 MHz,  $\text{D}_6$ -DMSO):  $\delta$  8.09 (s, 1H), 7.70 (d,  $J = 8.4$  Hz, 1H), 7.49 (d,  $J = 9.2$  Hz, 1H), 7.44-7.40 (m, 1H), 7.33 (d,  $J = 8.4$  Hz, 1H), 6.74 (d,  $J = 6.4$  Hz, 1H), 3.03 (s, 3H), 2.54 (s, 3H);  $^{13}\text{C}$  NMR (100 MHz,  $\text{D}_6$ -DMSO):  $\delta$  148.6, 142.7, 139.4, 129.5, 129.4, 129.1, 126.3, 118.2, 114.8, 114.3, 110.2, 21.3, 20.6; Exact mass calcd for  $\text{C}_{13}\text{H}_{13}\text{N}_2$   $[\text{M}+\text{H}]^+$ , 197.1073; Found: 197.1076.

#### 4-fluoropyrido[1,2-a]benzimidazole (2r)

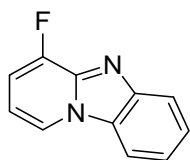

Yield: 94%. mp 225-226 °C, off-white solid.  $^1\text{H}$  NMR (400 MHz,  $\text{CDCl}_3$ ):  $\delta$  8.29 (d,  $J = 6.8$  Hz, 1H), 8.01 (d,  $J = 8.0$  Hz, 1H), 7.90 (d,  $J = 8.4$  Hz, 1H), 7.57 (t,  $J = 7.6$  Hz, 1H), 7.43 (t,  $J = 8.0$  Hz, 1H), 7.14 (t,  $J = 7.6$  Hz, 1H), 6.81-6.77 (m, 1H);  $^{13}\text{C}$  NMR (125 MHz,  $\text{CDCl}_3$ ):  $\delta$  152.5, 150.5, 144.2, 141.4, 141.2, 129.1, 126.1, 121.9, 121.4, 120.6, 111.1, 111.0, 110.7, 109.0; HRMS (ESI): Exact mass calcd for  $\text{C}_{11}\text{H}_7\text{FN}_2$   $[\text{M}+\text{H}]^+$ , 187.0666; Found: 187.0666.

#### 4-chloropyrido[1,2-a]benzimidazole (2s)

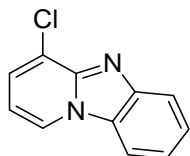

Yield: 84%. mp 147-148 °C, off-white solid.  $^1\text{H}$  NMR (400 MHz,  $\text{CDCl}_3$ ):  $\delta$  8.42 (d,  $J = 6.8$  Hz, 1H), 8.05 (d,  $J = 8.4$  Hz, 1H), 7.89 (d,  $J = 8.4$  Hz, 1H), 7.57-7.52 (m, 2H), 7.43 (d,  $J = 7.6$  Hz, 1H), 6.82 (t,  $J = 6.8$  Hz, 1H);  $^{13}\text{C}$  NMR (125 MHz,  $\text{CDCl}_3$ ):  $\delta$  145.8,

144.1, 129.5, 127.8, 126.2, 123.8, 123.5, 122.0, 120.7, 110.7, 109.8; HRMS (ESI):  
Exact mass calcd for C<sub>11</sub>H<sub>7</sub>ClN<sub>2</sub> [M+H]<sup>+</sup>, 203.0371; Found: 203.0372.

### ethyl benzo[4,5]imidazo[1,2-*a*]pyridine-4-carboxylate (2t)

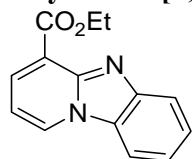

Yield: 67%. mp 98-100 °C, green solid. <sup>1</sup>H NMR (400 MHz, D<sub>6</sub>-DMSO): δ 9.34 (d, *J* = 6.4 Hz, 1H), 8.35 (d, *J* = 8.0 Hz, 1H), 8.17 (d, *J* = 6.4 Hz, 1H), 7.90 (d, *J* = 8.4 Hz, 1H), 7.56 (t, *J* = 7.6 Hz, 1H), 7.43 (t, *J* = 7.6 Hz, 1H), 7.10 (t, *J* = 7.2 Hz, 1H), 4.42 (t, *J* = 6.8 Hz, 2H), 1.37 (t, *J* = 7.2 Hz, 3H); <sup>13</sup>C NMR (100 MHz, D<sub>6</sub>-DMSO): δ 163.8, 144.5, 144.0, 133.6, 131.0, 128.2, 125.7, 121.1, 119.2, 119.0, 111.8, 108.9, 60.8, 14.0; HRMS (ESI): Exact mass calcd for C<sub>14</sub>H<sub>12</sub>N<sub>2</sub>O<sub>2</sub> [M+H]<sup>+</sup>, 241.0972; Found: 241.0974.

### 3-(trifluoromethyl)pyrido[1,2-*a*]benzimidazole (2u)

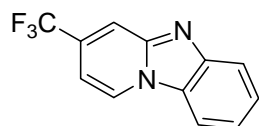

Yield: 93%. mp 226-227 °C, white solid. <sup>1</sup>H NMR (400 MHz, CDCl<sub>3</sub>): δ 8.57 (d, *J* = 7.2 Hz, 1H), 8.01 (t, *J* = 7.2 Hz, 2H), 7.95 (d, *J* = 8.0 Hz, 1H), 7.62-7.58 (m, 1H), 7.47 (t, *J* = 7.6 Hz, 1H), 7.01 (t, *J* = 7.2 Hz, 1H), <sup>13</sup>C NMR (125 MHz, CDCl<sub>3</sub>): δ 146.3, 145.1, 131.0, 130.7, 128.5, 126.5, 126.2, 124.1, 122.6, 121.9, 120.7, 116.3, 110.7, 105.9; HRMS (ESI): Exact mass calcd for C<sub>12</sub>H<sub>7</sub>F<sub>3</sub>N<sub>2</sub> [M+H]<sup>+</sup>, 237.0634; Found: 237.0636.

### Benzimidazo[1,2-*a*]quinoline (2v)

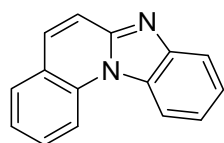

Yield: 93%. mp 97-99 °C, yellow solid. <sup>1</sup>H NMR (400 MHz, CDCl<sub>3</sub>): δ 8.58 (d, *J* = 8.4 Hz, 1H), 8.39 (d, *J* = 8.4 Hz, 1H), 8.02 (d, *J* = 8.0 Hz, 1H), 7.84 (d, *J* = 8.0 Hz, 1H), 7.78-7.74 (m, 1H), 7.70 (d, *J* = 9.6 Hz, 1H), 7.62 (d, *J* = 9.2 Hz, 1H), 7.57-7.47 (m, 3H); <sup>13</sup>C NMR (100 MHz, CDCl<sub>3</sub>): δ 148.3, 145.0, 135.9, 131.0, 129.6, 129.5, 124.4, 124.1, 123.6, 122.7, 120.7, 118.0, 115.3, 113.9; HRMS (ESI): Exact mass calcd for C<sub>15</sub>H<sub>11</sub>N<sub>2</sub> [M+H]<sup>+</sup>, 219.0917; Found: 219.0923.

### Benzimidazo[2,1-*a*]isoquinoline (2w)

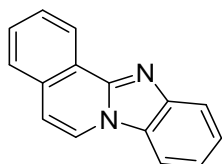

Yield: 77%. mp 129-130 °C, yellow solid.  $^1\text{H}$  NMR (400 MHz,  $\text{CDCl}_3$ ):  $\delta$  8.83 (d,  $J = 8.0$  Hz, 1H), 8.17 (d,  $J = 8.0$  Hz, 1H), 8.03 (d,  $J = 8.0$  Hz, 1H), 7.85 (d,  $J = 8.0$  Hz, 1H), 7.77-7.75 (m, 1H), 7.70-7.67 (m, 2H), 7.54-7.50 (m, 1H), 7.44-7.40 (m, 1H), 7.08 (d,  $J = 7.2$  Hz, 1H);  $^{13}\text{C}$  NMR (125 MHz,  $\text{CDCl}_3$ ):  $\delta$  147.3, 143.8, 131.6, 130.0, 128.2, 127.1, 125.0, 124.7, 123.6, 121.9, 121.4, 119.9, 111.4, 111.1, 109.8; HRMS (ESI): Exact mass calcd for  $\text{C}_{15}\text{H}_{11}\text{N}_2$   $[\text{M}+\text{H}]^+$ , 219.0917; Found: 219.0914.

### 2-phenyl-1H-benzo[d]imidazole (4a)

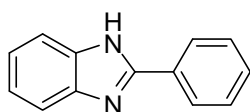

Yield: 95%. mp 302-303 °C, off-white solid.  $^1\text{H}$  NMR (400 MHz,  $\text{D}_6$ -DMSO):  $\delta$  12.89 (br s, 1H), 8.98 (d,  $J = 6.4$  Hz, 1H), 8.20 (d,  $J = 6.4$  Hz, 1H), 7.86 (d,  $J = 8.8$  Hz, 1H), 7.68 (t,  $J = 8.0$  Hz, 1H), 7.55-7.50 (m, 3H), 7.20 (t,  $J = 6.8$  Hz, 1H);  $^{13}\text{C}$  NMR (125 MHz,  $\text{D}_6$ -DMSO):  $\delta$  162.9, 151.1, 130.6, 130.5, 130.1, 129.1, 129.0, 126.8, 115.9, 114.4; HRMS (ESI): Exact mass calcd for  $\text{C}_{13}\text{H}_{11}\text{N}_2$   $[\text{M}+1]^+$  195.0917, found: 195.0918.

### 5-methyl-2-phenyl-1H-benzo[d]imidazole (4b)

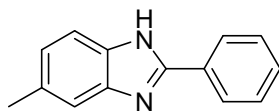

Yield: 91%. mp 247-249 °C, off-white solid.  $^1\text{H}$  NMR (400 MHz,  $\text{D}_6$ -DMSO):  $\delta$  12.74 (br s, 1H), 8.14 (d,  $J = 7.6$  Hz, 2H), 7.55-7.45 (m, 4H), 7.40-7.31 (m, 1H), 7.03 (t,  $J = 8.0$  Hz, 1H), 2.43 (s, 3H);  $^{13}\text{C}$  NMR (125 MHz,  $\text{D}_6$ -DMSO):  $\delta$  151.1, 150.7, 144.2, 141.9, 135.2, 133.0, 131.8, 130.5, 130.3, 129.6, 128.9, 126.2, 123.9, 123.2, 118.6, 118.4, 111.0, 110.8, 21.3, 21.2; HRMS (ESI): Exact mass calcd for  $\text{C}_{14}\text{H}_{13}\text{N}_2$   $[\text{M}+1]^+$  209.1073, found: 209.1074.

### 5-chloro-2-phenyl-1H-benzo[d]imidazole (4c)

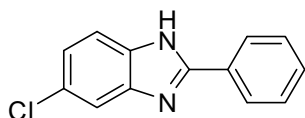

Yield: 90%. mp 213-215 °C, off-white solid.  $^1\text{H}$  NMR (400 MHz,  $\text{D}_6$ -DMSO):  $\delta$  13.09 (br s, 1H), 8.16 (d,  $J = 6.8$  Hz, 2H), 7.72-7.66 (m, 1H), 7.58-7.49 (m, 4H), 7.22 (t,  $J = 9.2$  Hz, 1H);  $^{13}\text{C}$  NMR (125 MHz,  $\text{D}_6$ -DMSO):  $\delta$  152.8, 152.4, 144.7, 142.6, 135.7, 133.8, 130.2, 129.7, 129.0, 126.8, 126.6, 126.1, 122.6, 122.1, 120.1, 118.2, 112.6, 111.0; HRMS (ESI): Exact mass calcd for  $\text{C}_{13}\text{H}_{10}\text{ClN}_2$   $[\text{M}+1]^+$  229.0527, found: 229.0527.

### 5-bromo-2-phenyl-1H-benzo[d]imidazole (4d)

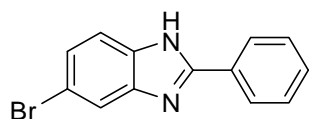

Yield: 91%. mp 201-202 °C, off-white solid. <sup>1</sup>H NMR (400 MHz, D<sub>6</sub>-DMSO): δ 13.07 (br s, 1H), 8.15 (t, *J* = 6.8 Hz, 2H), 7.84-7.66 (m, 1H), 7.61-7.47 (m, 4H), 7.32 (t, *J* = 8.8 Hz, 1H); <sup>13</sup>C NMR (125 MHz, D<sub>6</sub>-DMSO): δ 152.6, 152.3, 145.3, 142.9, 136.3, 134.1, 130.2, 129.6, 129.0, 126.6, 125.2, 124.7, 121.2, 120.5, 114.7, 113.9, 113.1; HRMS (ESI): Exact mass calcd for C<sub>13</sub>H<sub>10</sub>BrN<sub>2</sub> [M+1]<sup>+</sup> 273.0022, found: 273.0022.

## 4. References

- (1) (a) G. A. Grasa, M. S. Viciu, J. Huang and S. P. Nolan, *J. Org. Chem.*, 2001, **66**, 7729; (b) H. Wang, Y. Wang, C. Peng, J. Zhang and Q. Zhu, *J. Am. Chem. Soc.*, 2010, **132**, 13217.
- (2) J. Huang, Y. He, Y. Wang and Q. Zhu, *Chem. Eur. J.*, 2012, **18**, 13964.

## 5. Copies of <sup>1</sup>H NMR and <sup>13</sup>C NMR Spectra

5314

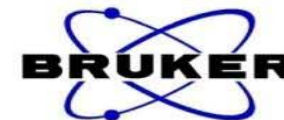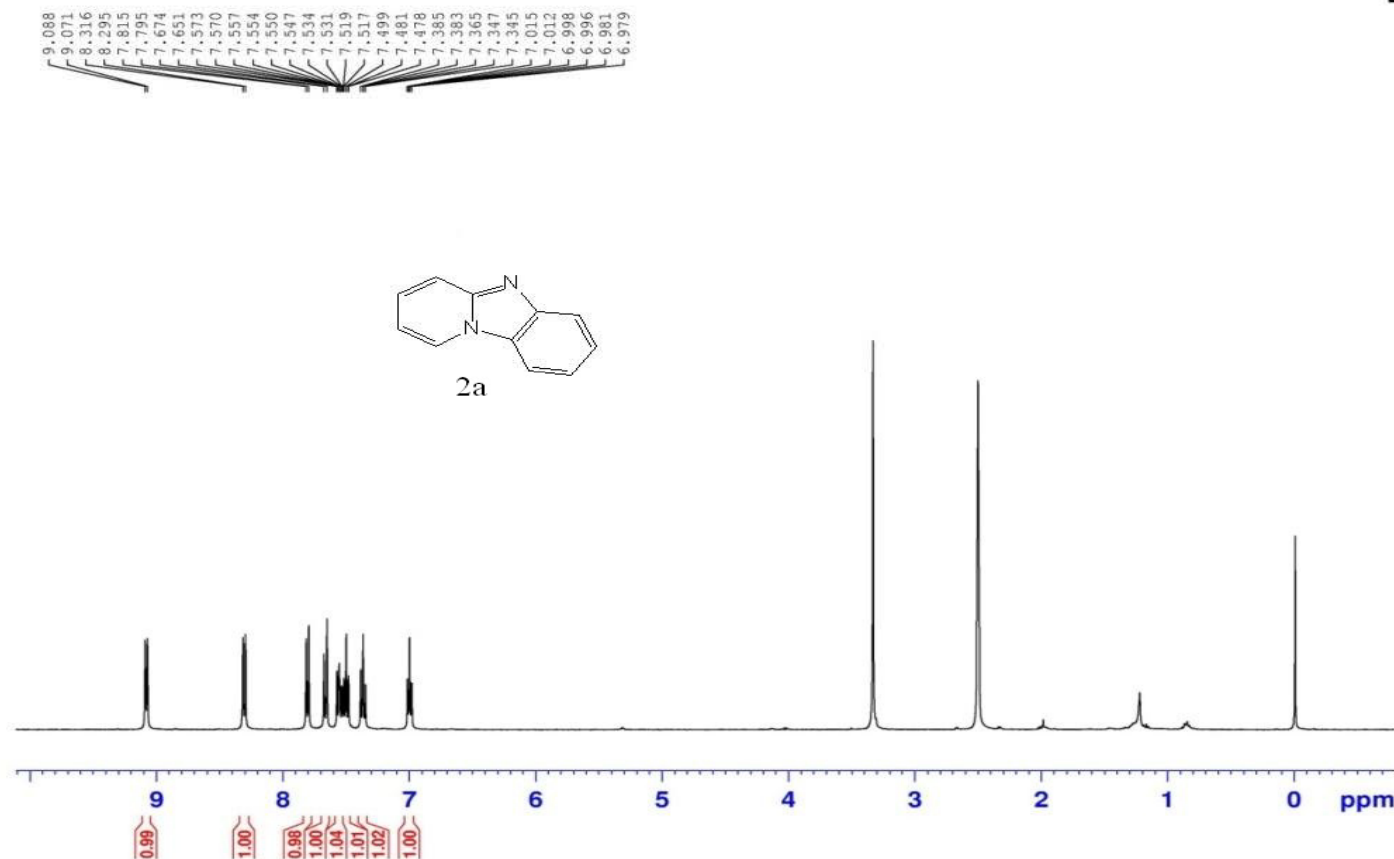

```
NAME he_yiniao
EXPNO 30
PROCNO 1
Date_ 20130429
Time 19.23
INSTRUM spect
PROBHD 5 mm PABBO BB-
PULPROG zg30
TD 65536
SOLVENT DMSO
NS 16
DS 2
SWH 8278.146 Hz
FIDRES 0.126314 Hz
AQ 3.9584243 sec
RG 322.5
EW 60.400 usec
DE 6.50 usec
TE 297.8 K
D1 1.00000000 sec
TD0 1

----- CHANNEL f1 -----
NUC1 1H
P1 12.58 usec
PL1 0.00 dB
PL1W 10.87646866 W
SFO1 400.1324710 MHz
SI 32768
SF 400.1300024 MHz
WDW EM
SSB 0
LB 0.30 Hz
GB 0
PC 1.00
```

5314

— 148.036  
— 144.258  
  
— 130.356  
— 128.875  
— 127.278  
— 125.590  
— 120.787  
— 119.231  
— 117.233  
— 112.170  
— 110.509

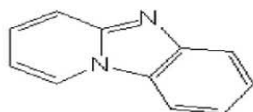

**2a**

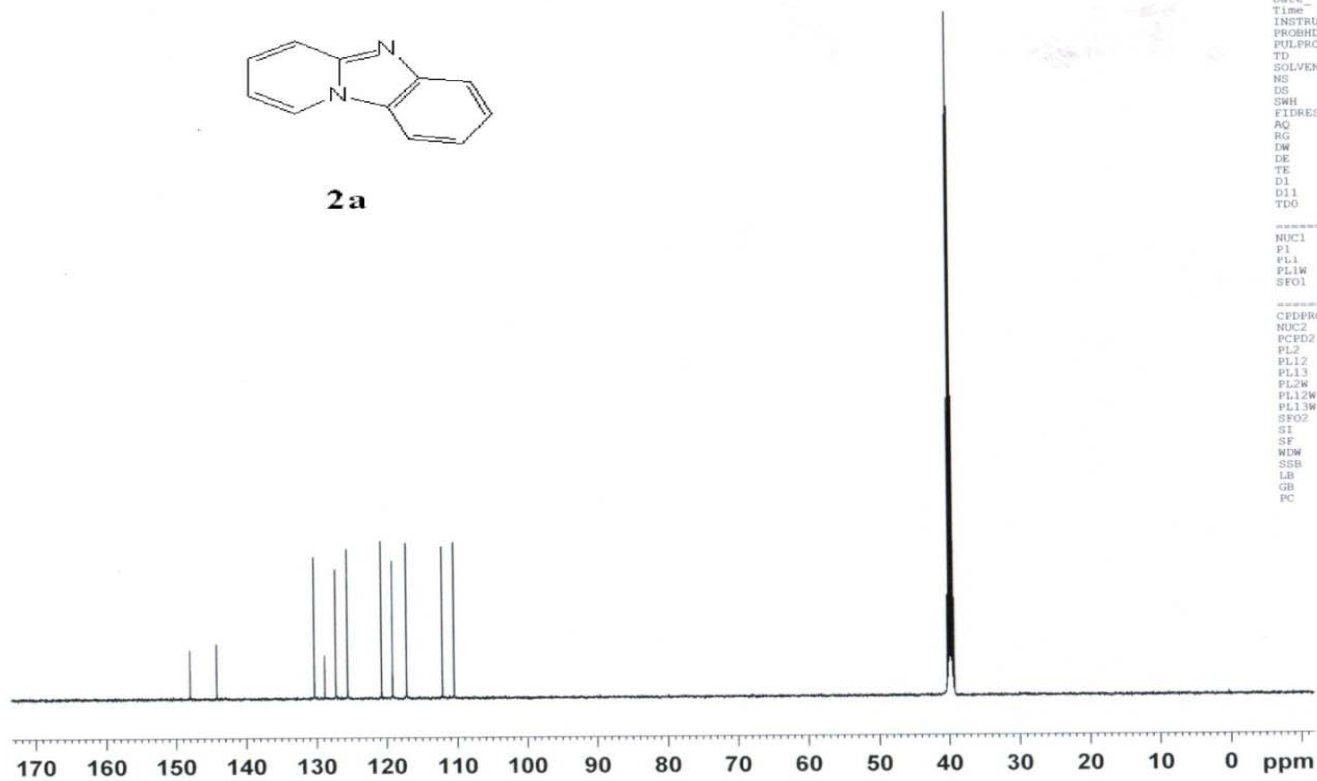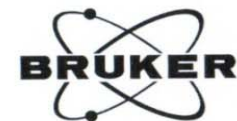

```
NAME          5314
EXPNO         2
PROCNO        1
Date_         20130429
Time          20.29
INSTRUM       Spect
PROBHD        5 mm PABBO BB-
PULPROG       zgpg30
TD            65536
SOLVENT       DMSO
NS            1024
DS            4
SWH           29761.904 Hz
FIDRES        0.454131 Hz
AQ            1.1010548 sec
RG            203
DW            16.800 usec
DE            6.50 usec
TE            296.6 K
D1            2.00000000 sec
D11           0.03000000 sec
TDO           1

----- CHANNEL f1 -----
NUC1          13C
P1            11.66 usec
PL1           0.00 dB
PL1W          83.39463043 W
SFO1          125.7703643 MHz

----- CHANNEL f2 -----
CDPRG2       waltz16
NUC2          1H
PCPD2        80.00 usec
PL2           2.50 dB
PL12         17.40 dB
PL13         17.40 dB
PL2W         13.02359581 W
PL12W        0.42143536 W
PL13W        0.42143536 W
SFO2         500.1320005 MHz
SI           32768
SF           125.7578162 MHz
WDW          EM
SSB           0
LB            1.00 Hz
GB            0
PC            1.40
```



hym5336

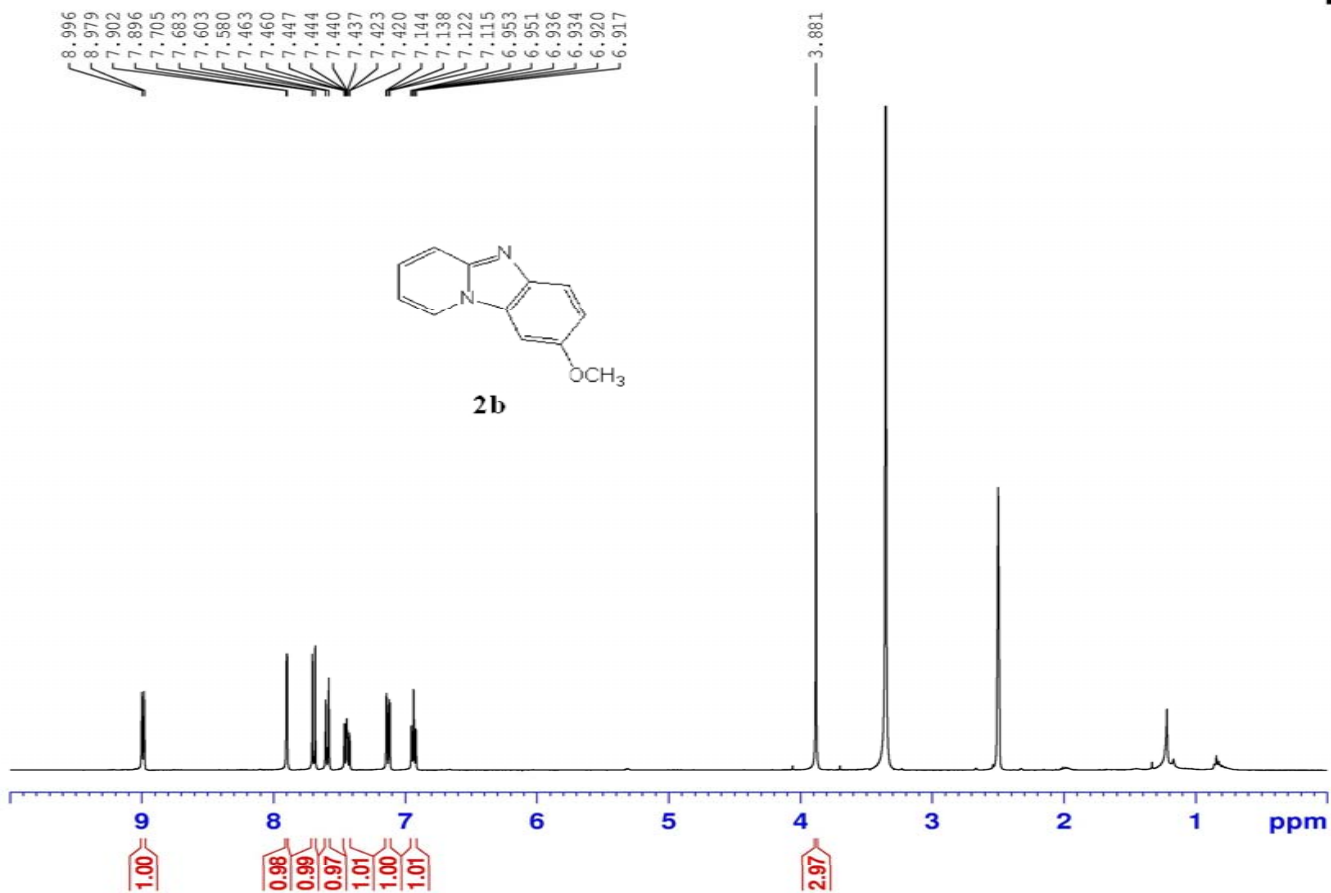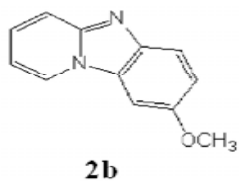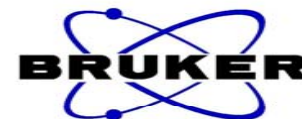

```
NAME          H PU
EXPNO         68
PROCNO        1
Date_         20111213
Time          15.16
INSTRUM       spect
PROBHD        5 mm PABBO BB-
PULPROG       zg30
TD            65536
SOLVENT       DMSO
NS            16
DS            2
SWH           8278.146 Hz
FIDRES        0.126314 Hz
AQ            3.9584243 sec
RG            228.1
DW            60.400 usec
DE            6.50 usec
TE            296.8 K
D1            1.0000000 sec
TDO           1
----- CHANNEL f1 -----
NUC1          1H
P1            14.50 usec
PL1           0.00 dB
PL1W          10.87646866 W
SFO1          400.1324710 MHz
SI            32768
SF            400.1300037 MHz
WDW           EM
SSB           0
LB            0.30 Hz
GB            0
PC            1.00
```

5336

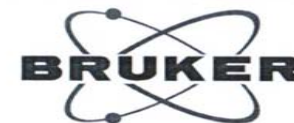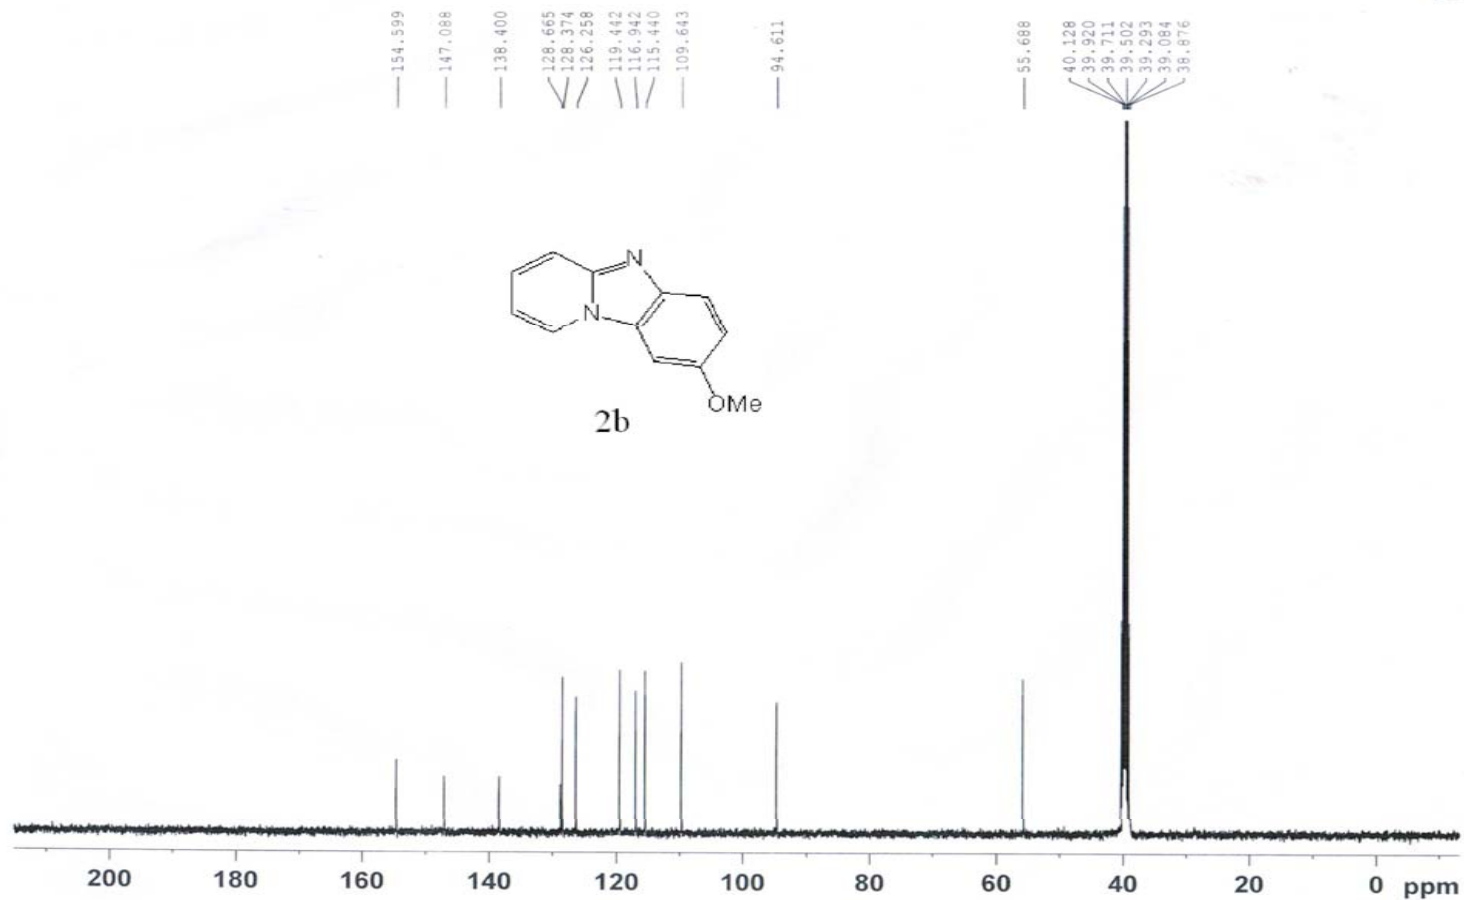

```
NAME May30-2012
EXPNO 60
PROCNO 1
Date_ 20120531
Time 0.30
INSTRUM spect
PROBHD 5 mm PABBO BB-
PULPROG zgpg30
TD 65536
SOLVENT DMSO
NS 1024
DS 4
SWH 23980.814 Hz
FIDRES 0.365918 Hz
AQ 1.3664756 sec
RG 1024
DM 20.850 usec
DE 6.50 usec
TE 673.2 K
D1 2.00000000 sec
D11 0.03000000 sec
TDO 1

----- CHANNEL f1 -----
NUC1 13C
P1 10.25 usec
PL1 0.00 dB
PL1W 38.68305706 W
SFO1 100.6228298 MHz

----- CHANNEL f2 -----
CPDPRG2 waltz16
NUC2 1H
PCPD2 80.00 usec
PL2 9.00 dB
PL12 14.54 dB
PL13 0.00 dB
PL2W 10.87646866 W
PL12W 0.38237365 W
PL13W 10.87646866 W
SFO2 400.1316005 MHz
SI 32768
SF 100.6128379 MHz
WDW EM
SSB 0
LB 1.00 Hz
GB 0
PC 1.40
```

2c

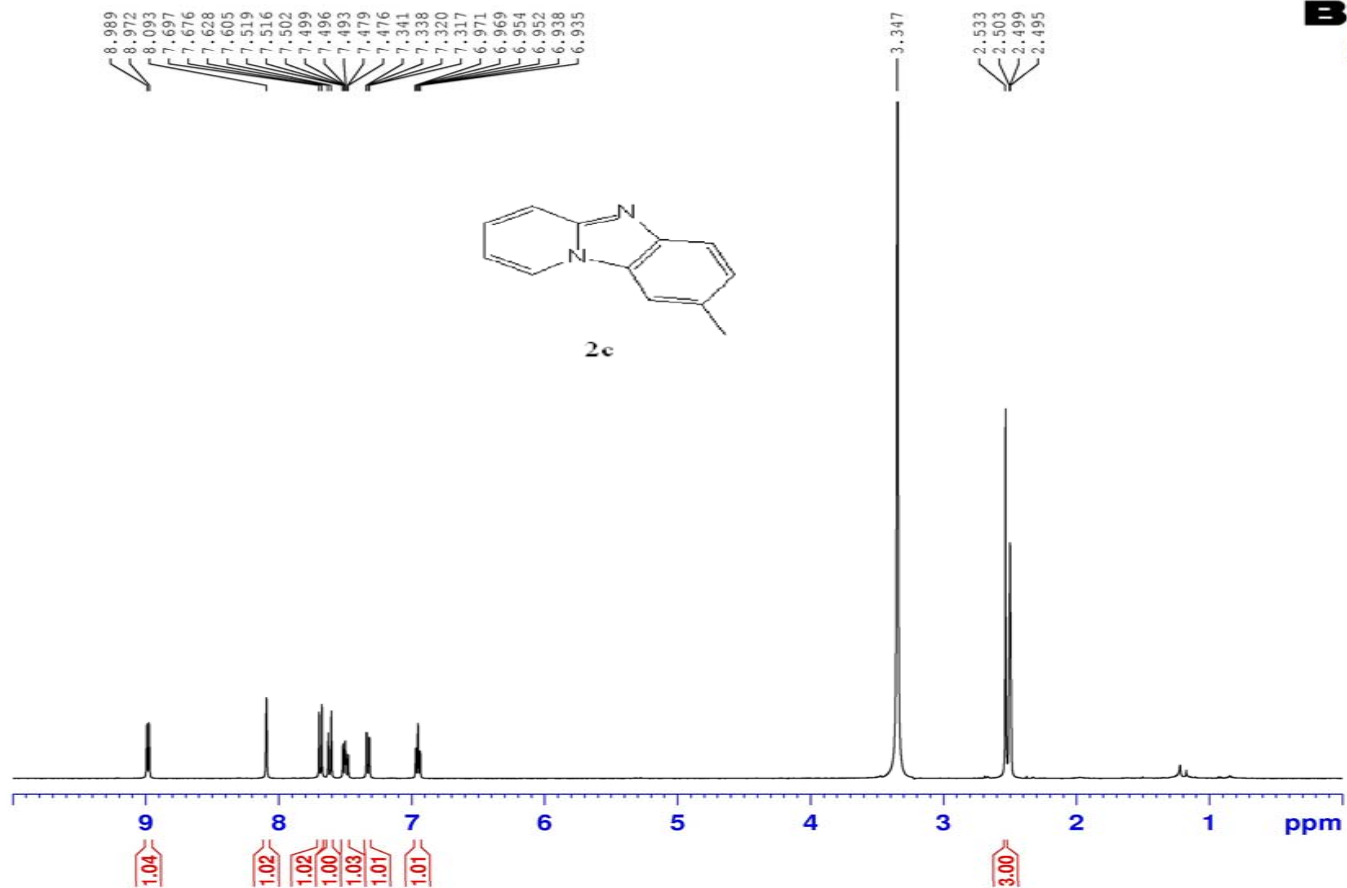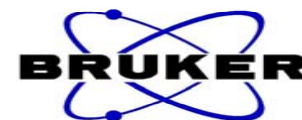

```
NAME Jun18-2013
EXPNO 17
PROCNO 1
Date_ 20130618
Time 10.47
INSTRUM spect
PROBHD 5 mm PABBO BB-
PULPROG zg30
TD 65536
SOLVENT DMSO
NS 8
DS 2
SWH 8278.146 Hz
FIDRES 0.126314 Hz
AQ 3.9584243 sec
RG 256
DM 60.400 usec
DE 6.50 usec
TE 298.8 K
D1 1.00000000 sec
TD0 1
----- CHANNEL f1 -----
NUC1 1H
P1 12.58 usec
PL1 0.00 dB
PL1W 10.87646866 W
SFO1 400.1324710 MHz
SI 32768
SF 400.1300020 MHz
WDW EM
SSB 0
LB 0.30 Hz
GB 0
PC 1.00
```

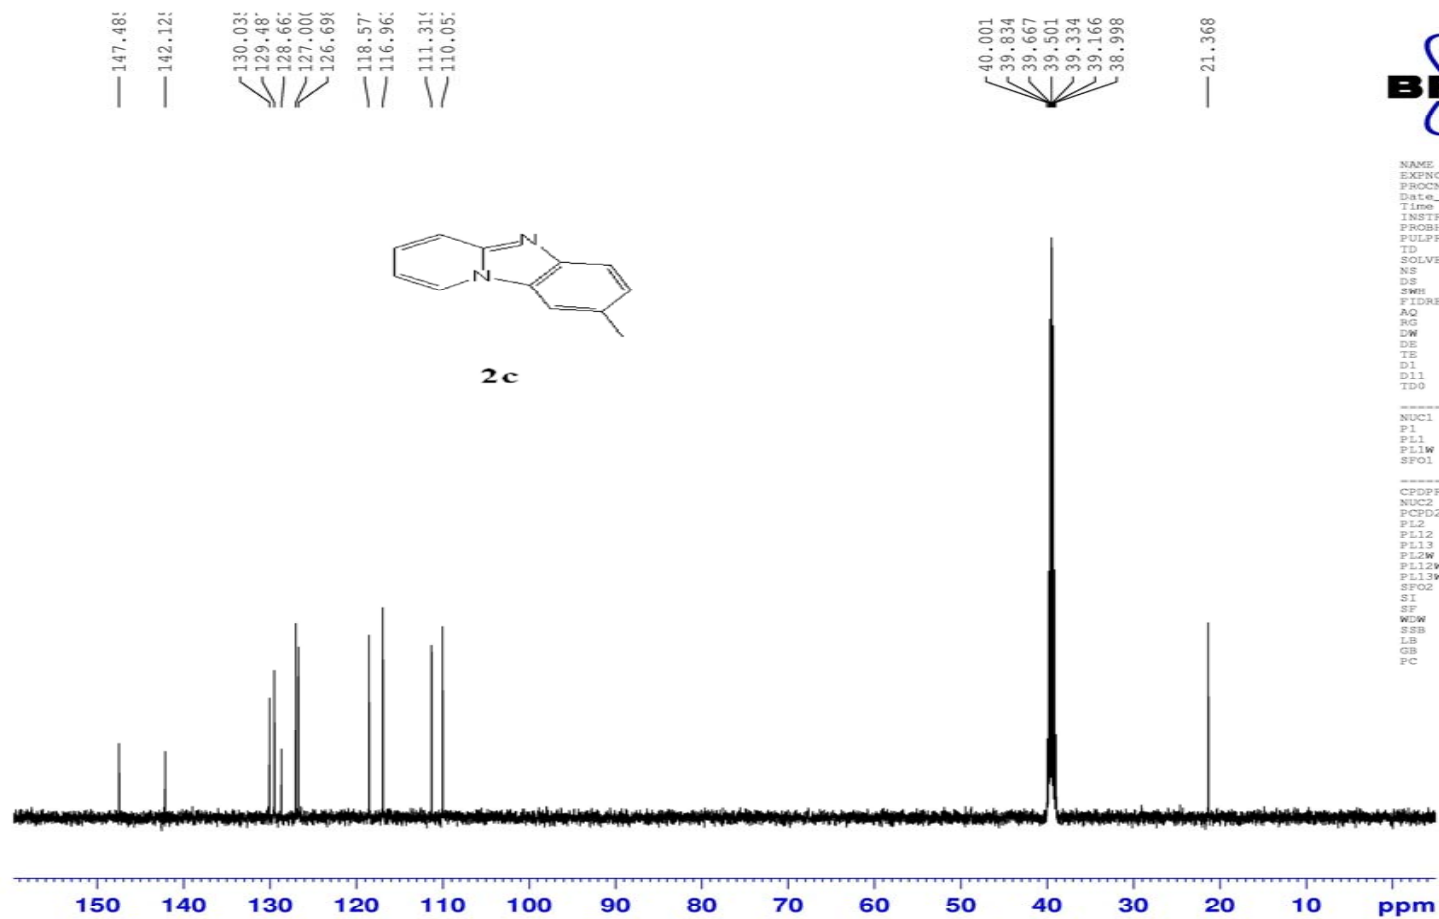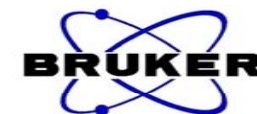

```
NAME 5023
EXPNO 1
PROCNO 1
Date_ 20120530
Time 13.40
INSTRUM Spect
PROBHD 5 mm PABBO BB-
PULPROG zgpg30
TD 65536
SOLVENT DMSO
NS 48
DS 4
SWH 29761.904 Hz
FIDRES 0.454131 Hz
AQ 1.1010548 sec
RG 203
DM 16.800 usec
DE 6.50 usec
TE 297.5 K
D1 2.0000000 sec
D11 0.0300000 sec
TD0 1
----- CHANNEL f1 -----
NUC1 13C
P1 11.57 usec
PL1 0.00 dB
PL1W 82.39463043 W
SFO1 125.7703643 MHz
----- CHANNEL f2 -----
CPDPRG2 waltz16
NUC2 1H
PCPD2 80.00 usec
PL2 2.50 dB
PL12 17.40 dB
PL13 17.40 dB
PL1W 13.02359581 W
PL12W 0.42143536 W
PL13W 0.42143536 W
SFO2 500.1320005 MHz
SI 32768
SF 125.7578503 MHz
WDW EM
SSB 0
LB 1.00 Hz
GB 0
PC 1.40
```

hym5325

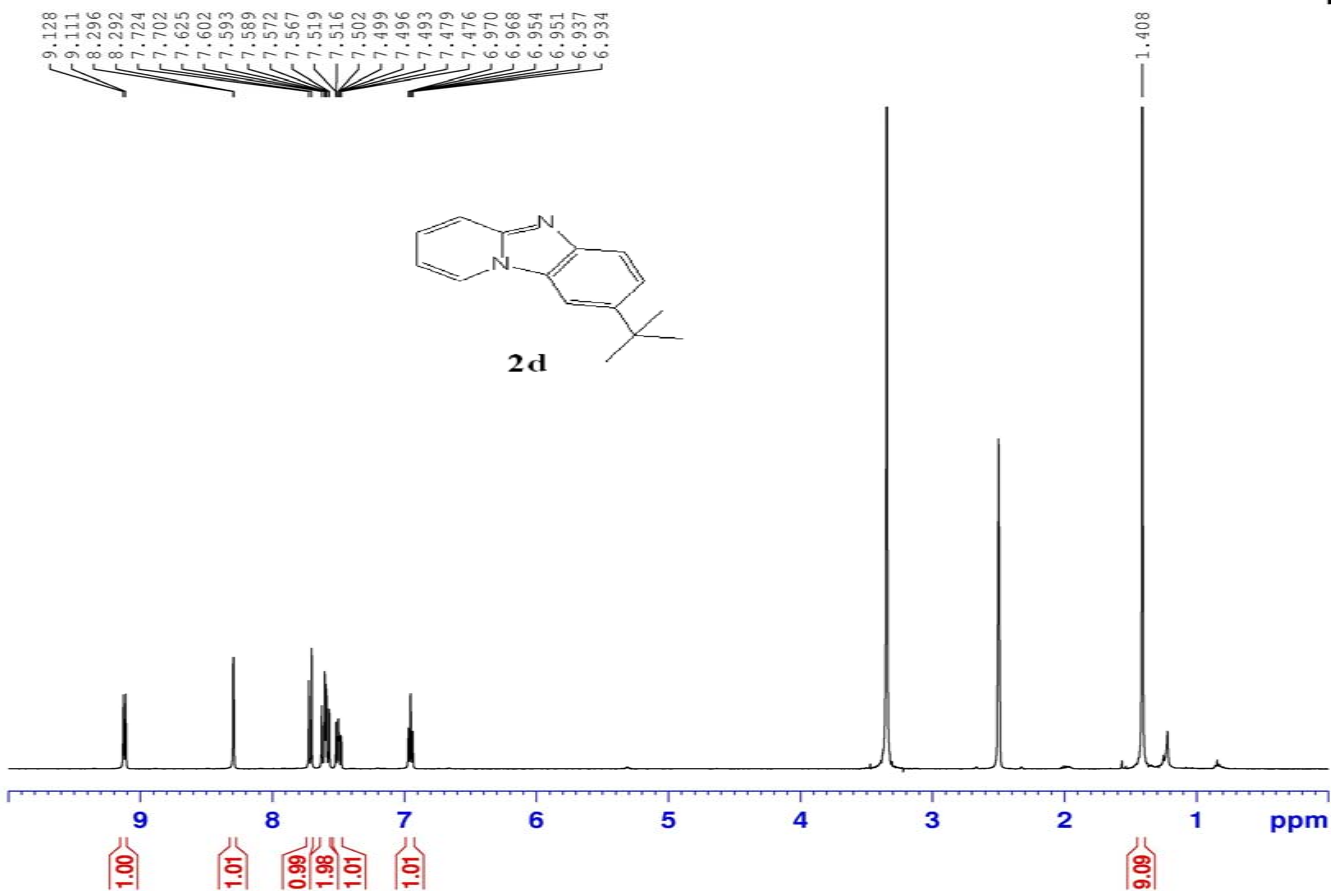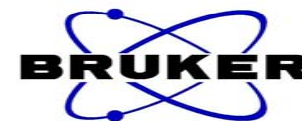

```
NAME          H PU
EXPNO          60
PROCNO         1
Date_         20111204
Time          14.00
INSTRUM       spect
PROBHD        5 mm PABBO BB-
PULPROG       zg30
TD            65536
SOLVENT       CDCl3
NS            16
DS            2
SWH           8278.146 Hz
FIDRES        0.126314 Hz
AQ            3.9584243 sec
RG            228.1
DW            60.400 usec
DE            6.50 usec
TE            296.2 K
D1            1.0000000 sec
TDO           1
----- CHANNEL f1 -----
NUC1          1H
P1            14.50 usec
PL1           0.00 dB
PLLW          10.87646866 W
SFO1          400.1324710 MHz
SI            32768
SF            400.1319044 MHz
WDW           EM
SSB           0
LB            0.30 Hz
GB            0
PC            1.00
```

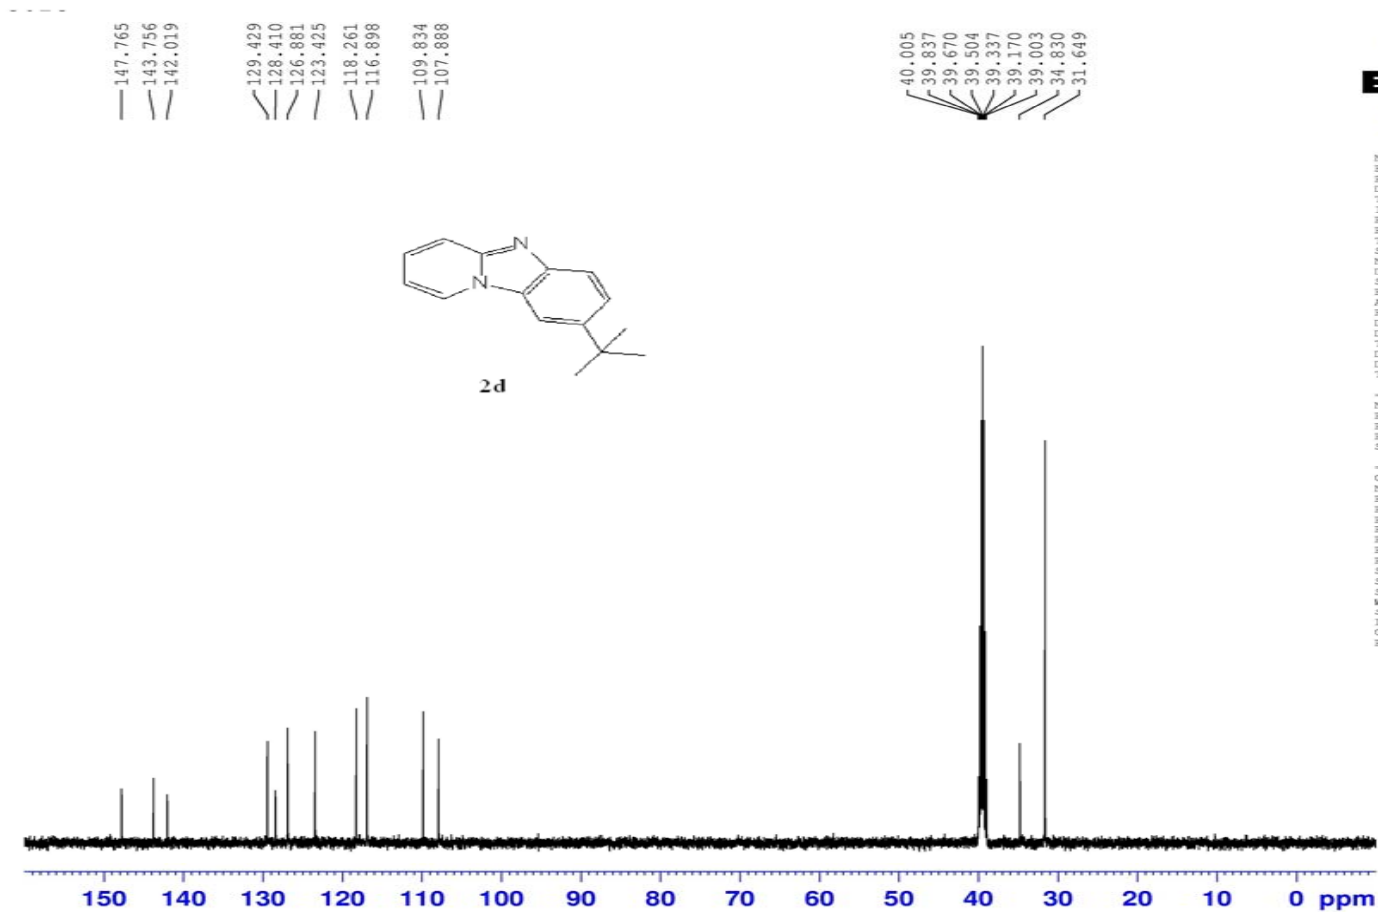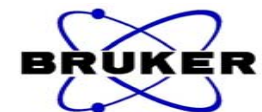

```
NAME          5025
EXPNO         1
PROCNO        1
Date_         20120530
Time          13.44
INSTRUM       spect
PROBHD        5 mm PABBO BB-
PULPROG       zgpg30
TD            65536
SOLVENT       DMSO
NS            64
DS            4
SWH           29761.904 Hz
FIDRES        0.454131 Hz
AQ            1.1010548 sec
RG            203
DW            16.800 usec
DE            6.50 usec
TE            297.8 K
D1            2.0000000 sec
D11           0.0300000 sec
TDO           1
----- CHANNEL f1 -----
NUC1          13C
P1            11.57 usec
PL1           0.00 dB
PL1W          83.39463043 W
SFO1          125.7703643 MHz
----- CHANNEL f2 -----
CPDPRG2       waltz16
NUC2          1H
PCPD2         80.00 usec
PL2           2.50 dB
PL12          17.40 dB
PL13          17.40 dB
PL2W          13.02339581 W
PL12W         0.42143536 W
PL13W         0.42143536 W
SFO2          500.1320005 MHz
SI            32768
SF            125.7578546 MHz
WFM          EM
SSB           0
LB            1.00 Hz
GB            0
PC            1.40
```

2e

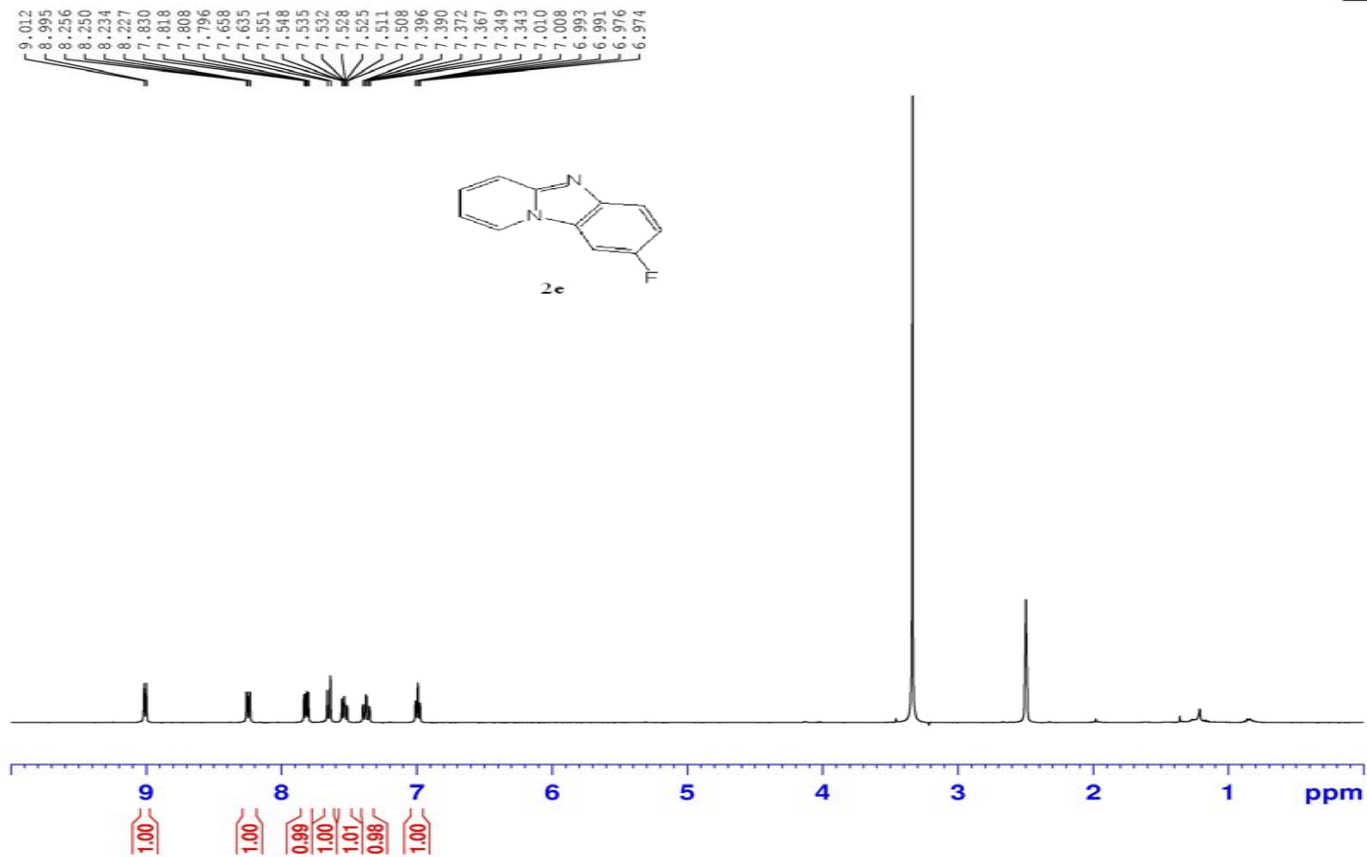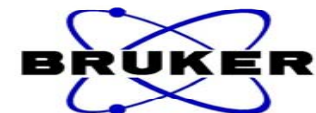

```
NAME Jun18-2013
EXPNO 6
PROCNO 1
Date_ 20130618
Time 9.57
INSTRUM spect
PROBHD 5 mm PABBO BB-
PULPROG zg30
TD 65536
SOLVENT DMSO
NS 8
DS 2
SWH 8278.146 Hz
FIDRES 0.126314 Hz
AQ 3.9584243 sec
RG 256
DW 60.400 usec
DE 6.50 usec
TE 298.4 K
D1 1.0000000 sec
TD0 1
----- CHANNEL f1 -----
NUC1 1H
P1 12.58 usec
PL1 0.00 dB
PL1W 10.87646866 W
SF01 400.1324710 MHz
SI 32768
SF 400.1300037 MHz
WDW EM
SSB 0
LB 0.30 Hz
GB 0
PC 1.00
```

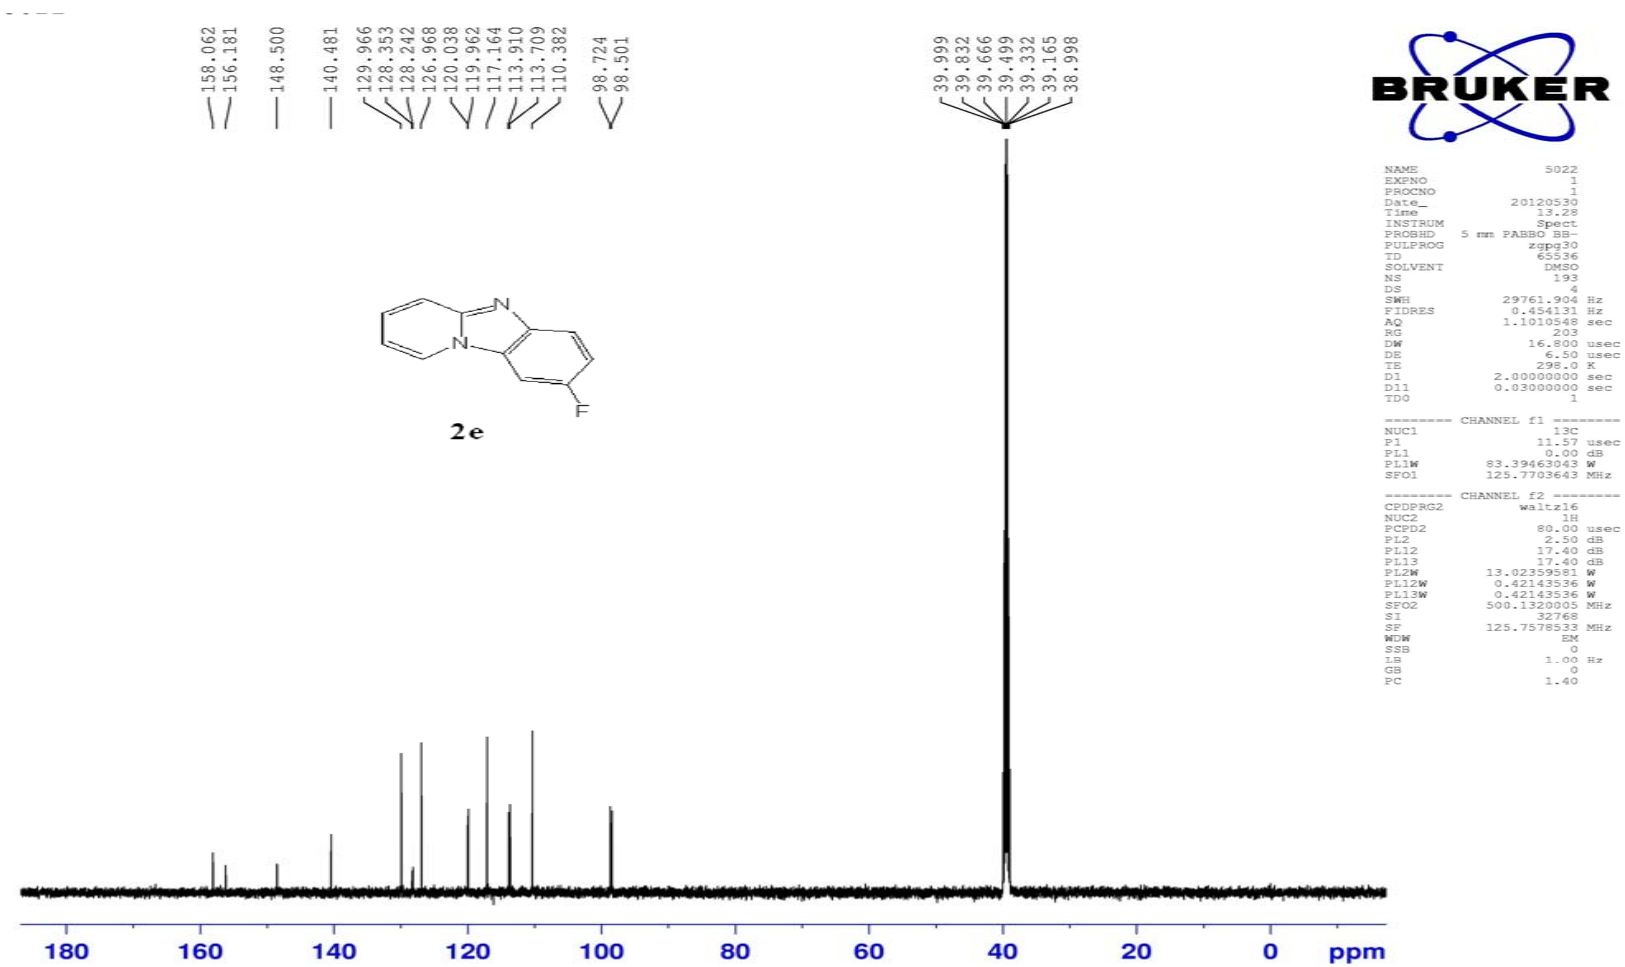



hym5319

8.376  
8.359  
7.890  
7.886  
7.860  
7.838  
7.694  
7.671  
7.500  
7.495  
7.478  
7.473  
7.458  
7.456  
7.441  
7.439  
7.435  
7.433  
7.418  
7.416  
6.888  
6.872  
6.855

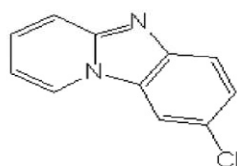

2f

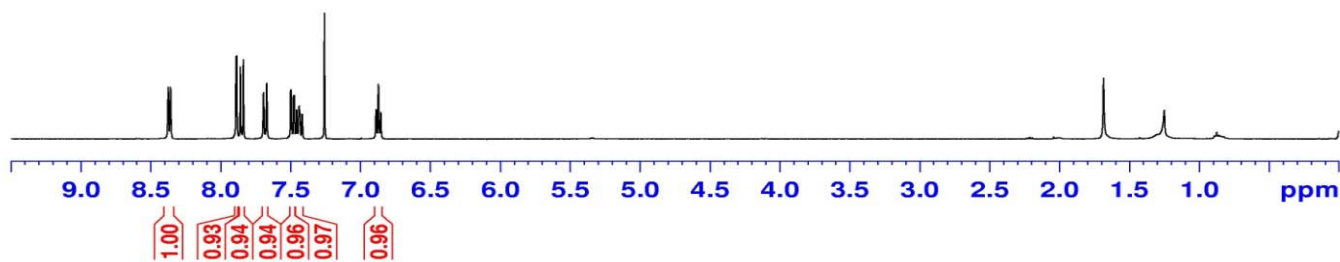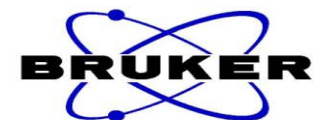

```
NAME          H PU
EXPNO         54
PROCNO        1
Date_         20111204
Time          9.11
INSTRUM       spect
PROBHD        5 mm PABBO BB-
PULPROG       zg30
TD            65536
SOLVENT       CDCl3
NS            16
DS            2
SWH           8278.146 Hz
FIDRES        0.126314 Hz
AQ            3.9584243 sec
RG            322.5
DW            60.400 usec
DE            6.50 usec
TE            297.1 K
D1            1.00000000 sec
TDO           1
```

```
===== CHANNEL f1 =====
NUC1          1H
P1            14.50 usec
PL1           0.00 dB
PL1W          10.87646866 W
SFO1          400.1324710 MHz
SI            32768
SF            400.1300102 MHz
WDW           EM
SSB           0
LB            0.30 Hz
GB            0
PC            1.00
```

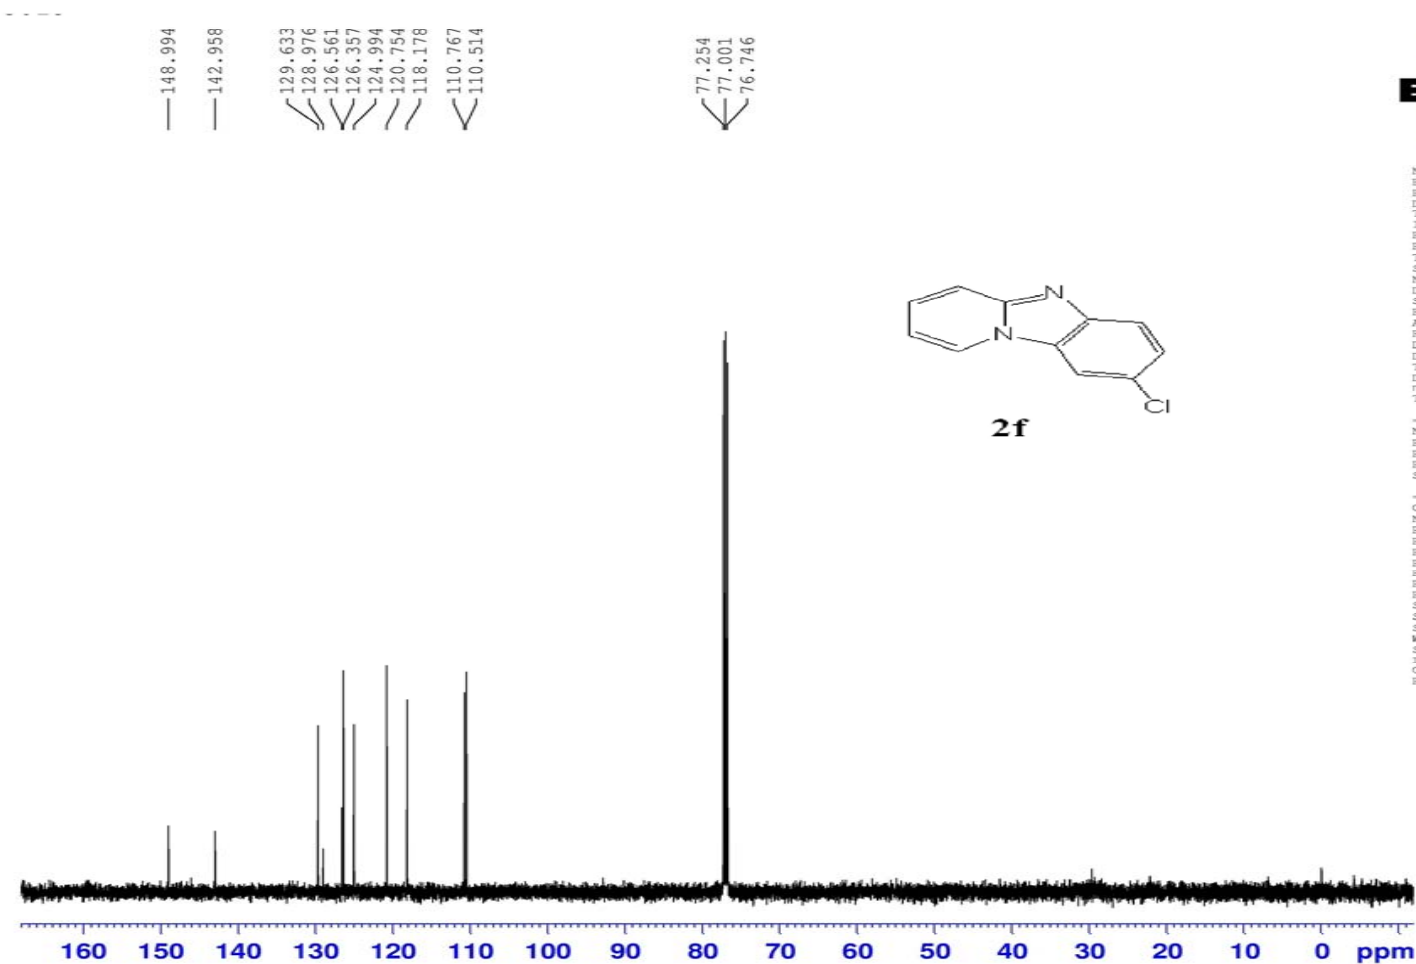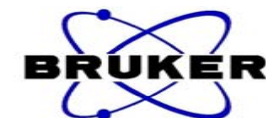

```
NAME          5019
EXPNO         1
PROCNO       1
Date_         20120530
Time         13.25
INSTRUM      Spect
PROBHD       5 mm PABBO BB-
PULPROG      zgpg30
ID           65536
SOLVENT      CDCl3
NS           102
DS           4
SWH          29761.904 Hz
FIDRES       0.454131 Hz
AQ           1.1010548 sec
RG           203
DW           16.800 usec
DE           6.50 usec
TE           297.1 K
D1           2.0000000 sec
d11          0.0000000 sec
TD0          1

----- CHANNEL f1 -----
NUC1         13C
P1           11.57 usec
PL1          0.00 dB
PL1W         83.39463043 W
SFO1         125.7703643 MHz

----- CHANNEL f2 -----
CPDPRG2      waltz16
NUC2         1H
PCPD2        80.00 usec
PL2          2.50 dB
PL12         17.40 dB
PL13         17.40 dB
PL2W         13.02339081 W
PL12W        0.42143536 W
PL13W        0.42143536 W
SFO2         500.1320005 MHz
SI           32.768
SF           125.7577974 MHz
WDW          EM
SSB          0
LB           1.00 Hz
GB           0
PC           1.40
```

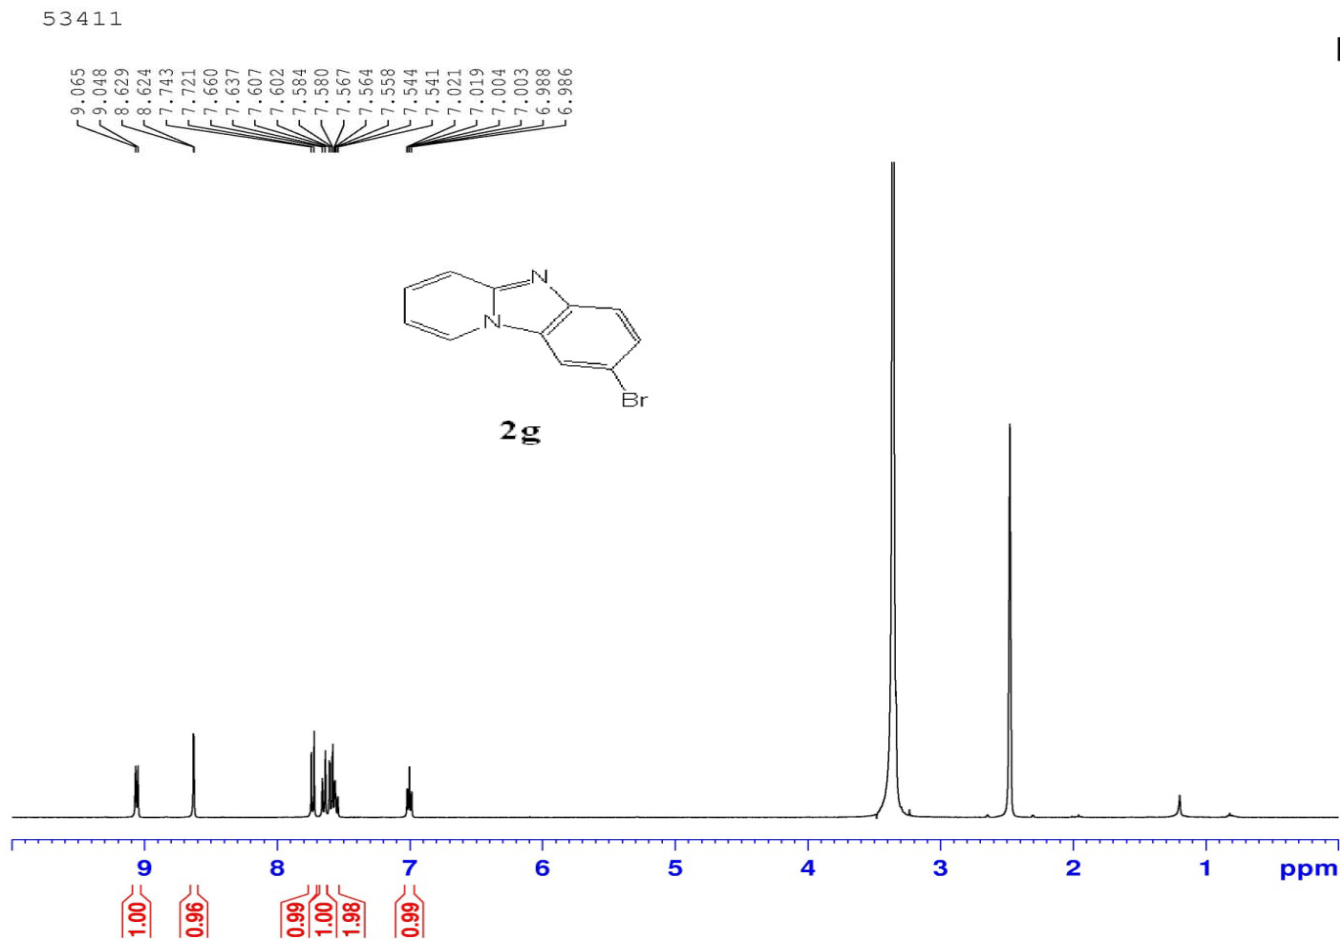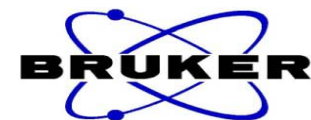

```
NAME          New Folder
EXPNO         30
PROCNO        1
Date_         20120221
Time          8.20
INSTRUM       spect
PROBHD        5 mm PABBO BB-
PULPROG       zg30
TD            65536
SOLVENT       DMSO
NS            16
DS            2
SWH           8278.146 Hz
FIDRES        0.126314 Hz
AQ            3.9584243 sec
RG            161.3
DW            60.400 usec
DE            6.50 usec
TE            297.6 K
D1            1.00000000 sec
TDO           1
```

```
===== CHANNEL f1 =====
NUC1           1H
P1             14.50 usec
PL1            0.00 dB
PL1W           10.87646866 W
SFO1           400.1324710 MHz
SI             32768
SF             400.1300120 MHz
WDW            EM
SSB            0
LB             0.30 Hz
GB             0
PC             1.00
```

5341

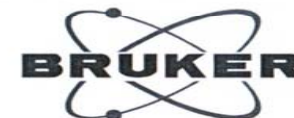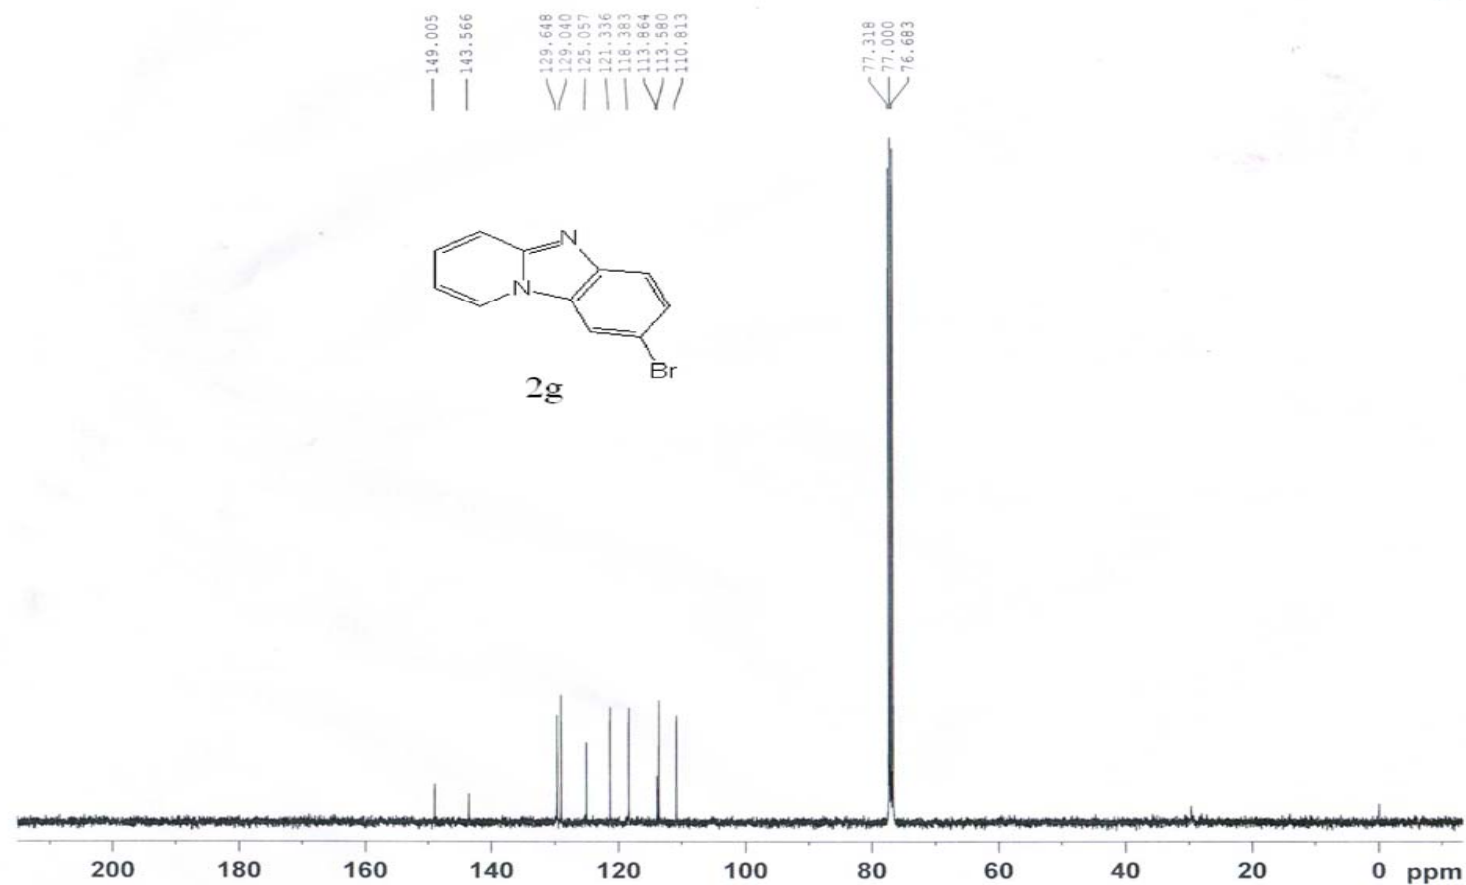

NAME May30-2012  
EXPNO 63  
PROCNO 1  
Date 20120531  
Time 3.43  
INSTRUM spect  
PROBHD 5 mm PABBO BB-  
PULPROG zgpg30  
TD 65536  
SOLVENT CDCl3  
NS 1024  
DS 4  
SWH 23980.814 Hz  
FIDRES 0.365918 Hz  
AQ 1.3664756 sec  
RG 1149.4  
DW 20.850 usec  
DE 6.50 usec  
TE 673.2 K  
D1 2.0000000 sec  
D11 0.0300000 sec  
TD0 1

----- CHANNEL f1 -----  
NUC1 13C  
P1 10.25 usec  
PL1 0.00 dB  
PL1W 38.68305206 W  
SFO1 100.6228298 MHz

----- CHANNEL f2 -----  
CPDPRG2 waltz16  
NUC2 1H  
PCPD2 80.00 usec  
PL2 0.00 dB  
PL12 14.54 dB  
PL13 0.00 dB  
PL2W 10.87646866 W  
PL12W 0.38237360 W  
PL13W 10.87646866 W  
SFO2 400.1316005 MHz  
S1 32768  
SF 100.6127621 MHz  
WDW EM  
SSB 0  
LB 1.00 Hz  
GB 0  
PC 1.40

2h

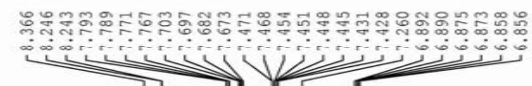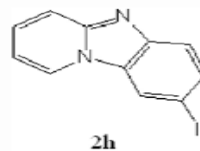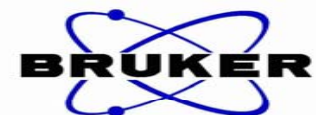

```
NAME      be_yimiao
EXPNO     31
PROCNO    1
Date_     20130618
Time      22.15
INSTRUM   spect
PROBHD    5 mm PABBO BB-
PULPROG   zg30
TD         65536
SOLVENT   CDCl3
NS         16
DS         2
SWH        8278.146 Hz
FIDRES     0.126314 Hz
AQ         3.9584243 sec
RG         322.5
DW         60.400 usec
DE         6.50 usec
TE         299.9 K
D1         1.0000000 sec
TDD        1
```

```
----- CHANNEL f1 -----
NUC1       1H
P1         12.58 usec
PL1        0.00 dB
PL1W       10.87646866 W
srul       400.1324710 MHz
SI         32768
SF         400.1300090 MHz
WDW        EM
SSB        0
LB         0.30 Hz
GB         0
PC         1.00
```

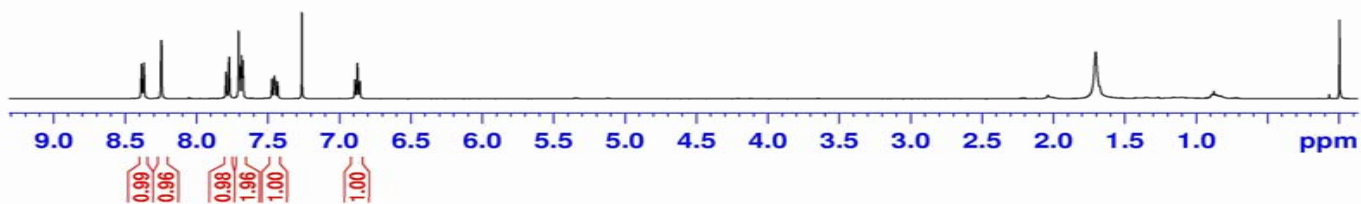

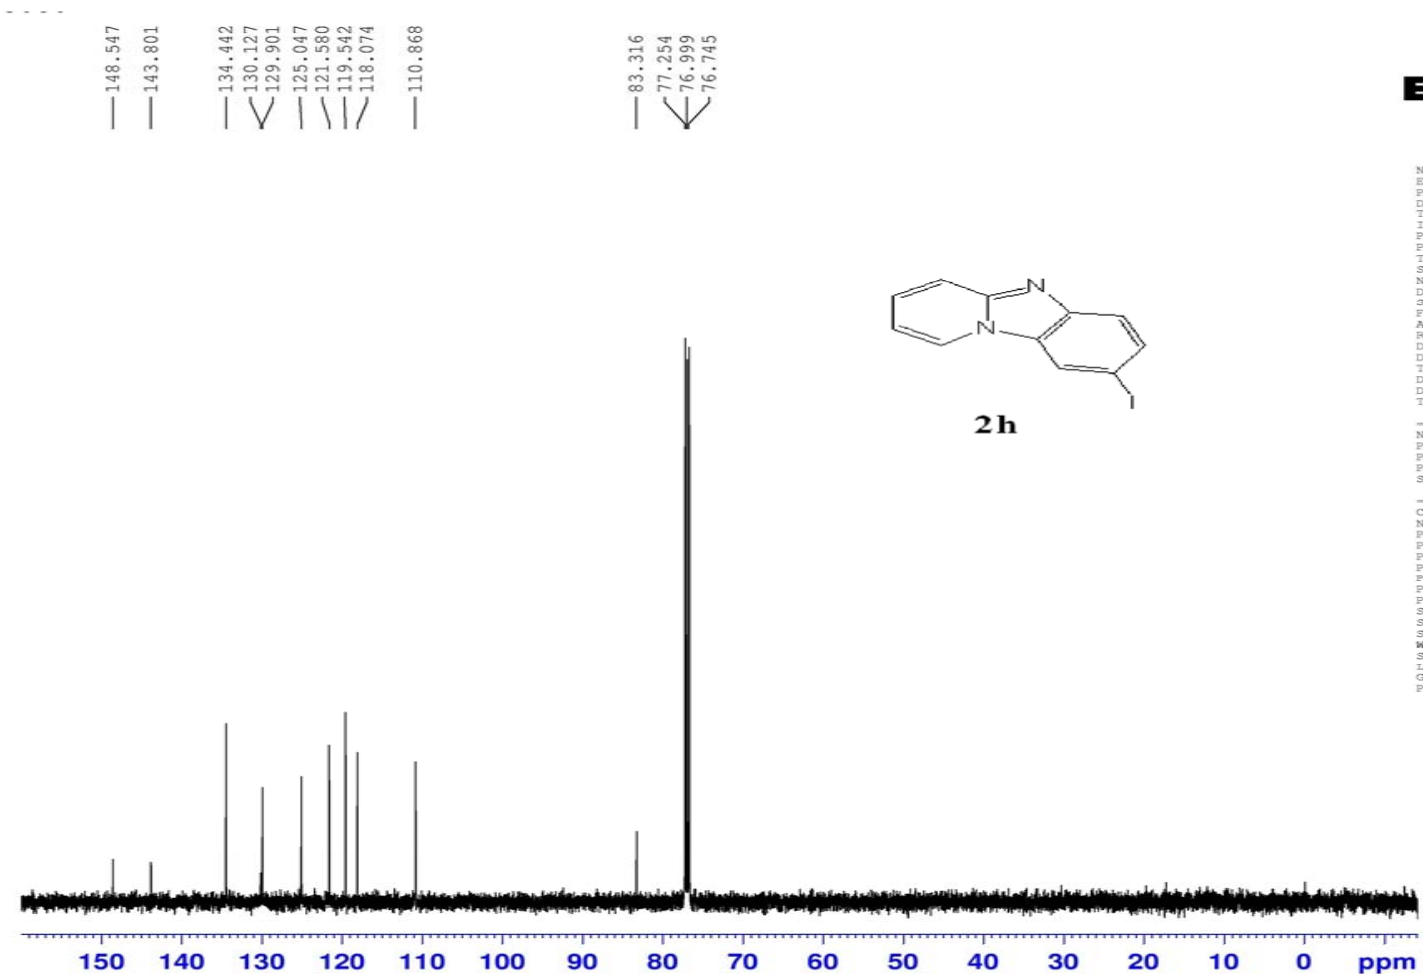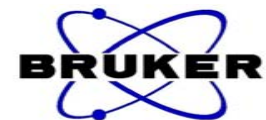

```
NAME 5080
EXPNO 1
PROCNO 1
Date_ 20120530
Time 13.06
INSTRUM Spect
PROBHD 5 mm PABBO BB-
PULPROG zgpg30
TD 65536
SOLVENT CDCl3
NS 96
DS 4
SWH 29761.904 Hz
FIDRES 0.454131 Hz
AQ 1.1010548 sec
RG 203
DW 16.800 usec
DE 6.50 usec
TE 297.7 K
D1 2.0000000 sec
D11 0.0300000 sec
TD0 1

----- CHANNEL f1 -----
NUC1 13C
P1 11.57 usec
PL1 0.00 dB
PL1W 83.39463043 W
SFO1 125.7703643 MHz

----- CHANNEL f2 -----
CPDPRG2 waltz16
NUC2 1H
PCPD2 80.00 usec
PL2 2.50 dB
PL12 17.40 dB
PL13 17.40 dB
PL2W 13.02339581 W
PL12W 0.42143536 W
PL13W 0.42143536 W
SFO2 500.1320005 MHz
SI 32768
SF 125.7577973 MHz
WDW EM
SSB 0
LB 1.00 Hz
GB 0
PC 1.40
```

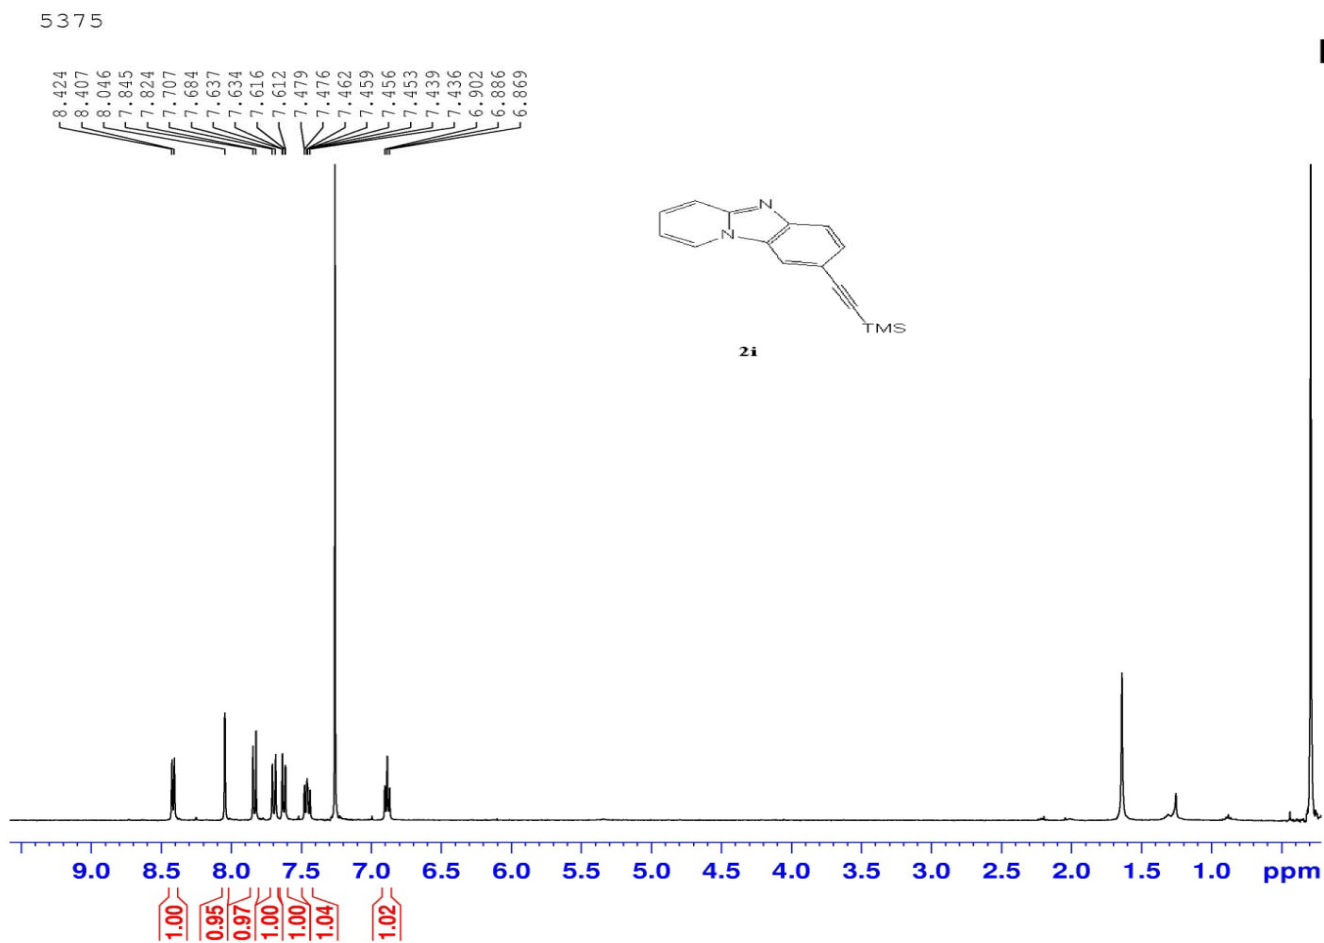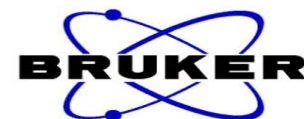

```
NAME          H 2I
EXPNO         32
PROCNO        1
Date_         20120222
Time          8.24
INSTRUM       spect
PROBHD        5 mm PABBO BB-
PULPROG       zg30
TD            65536
SOLVENT       CDCl3
NS            16
DS            2
SWH           8278.146 Hz
FIDRES        0.126314 Hz
AQ            3.9584243 sec
RG            362
DW            60.400 usec
DE            6.50 usec
TE            297.4 K
D1            1.00000000 sec
D11           1
D12           1
D13           1
D14           1
D15           1
D16           1
D17           1
D18           1
D19           1
D20           1
D21           1
D22           1
D23           1
D24           1
D25           1
D26           1
D27           1
D28           1
D29           1
D30           1
D31           1
D32           1
D33           1
D34           1
D35           1
D36           1
D37           1
D38           1
D39           1
D40           1
D41           1
D42           1
D43           1
D44           1
D45           1
D46           1
D47           1
D48           1
D49           1
D50           1
D51           1
D52           1
D53           1
D54           1
D55           1
D56           1
D57           1
D58           1
D59           1
D60           1
D61           1
D62           1
D63           1
D64           1
D65           1
D66           1
D67           1
D68           1
D69           1
D70           1
D71           1
D72           1
D73           1
D74           1
D75           1
D76           1
D77           1
D78           1
D79           1
D80           1
D81           1
D82           1
D83           1
D84           1
D85           1
D86           1
D87           1
D88           1
D89           1
D90           1
D91           1
D92           1
D93           1
D94           1
D95           1
D96           1
D97           1
D98           1
D99           1
D100          1
D101          1
D102          1
D103          1
D104          1
D105          1
D106          1
D107          1
D108          1
D109          1
D110          1
D111          1
D112          1
D113          1
D114          1
D115          1
D116          1
D117          1
D118          1
D119          1
D120          1
D121          1
D122          1
D123          1
D124          1
D125          1
D126          1
D127          1
D128          1
D129          1
D130          1
D131          1
D132          1
D133          1
D134          1
D135          1
D136          1
D137          1
D138          1
D139          1
D140          1
D141          1
D142          1
D143          1
D144          1
D145          1
D146          1
D147          1
D148          1
D149          1
D150          1
D151          1
D152          1
D153          1
D154          1
D155          1
D156          1
D157          1
D158          1
D159          1
D160          1
D161          1
D162          1
D163          1
D164          1
D165          1
D166          1
D167          1
D168          1
D169          1
D170          1
D171          1
D172          1
D173          1
D174          1
D175          1
D176          1
D177          1
D178          1
D179          1
D180          1
D181          1
D182          1
D183          1
D184          1
D185          1
D186          1
D187          1
D188          1
D189          1
D190          1
D191          1
D192          1
D193          1
D194          1
D195          1
D196          1
D197          1
D198          1
D199          1
D200          1
D201          1
D202          1
D203          1
D204          1
D205          1
D206          1
D207          1
D208          1
D209          1
D210          1
D211          1
D212          1
D213          1
D214          1
D215          1
D216          1
D217          1
D218          1
D219          1
D220          1
D221          1
D222          1
D223          1
D224          1
D225          1
D226          1
D227          1
D228          1
D229          1
D230          1
D231          1
D232          1
D233          1
D234          1
D235          1
D236          1
D237          1
D238          1
D239          1
D240          1
D241          1
D242          1
D243          1
D244          1
D245          1
D246          1
D247          1
D248          1
D249          1
D250          1
D251          1
D252          1
D253          1
D254          1
D255          1
D256          1
D257          1
D258          1
D259          1
D260          1
D261          1
D262          1
D263          1
D264          1
D265          1
D266          1
D267          1
D268          1
D269          1
D270          1
D271          1
D272          1
D273          1
D274          1
D275          1
D276          1
D277          1
D278          1
D279          1
D280          1
D281          1
D282          1
D283          1
D284          1
D285          1
D286          1
D287          1
D288          1
D289          1
D290          1
D291          1
D292          1
D293          1
D294          1
D295          1
D296          1
D297          1
D298          1
D299          1
D300          1
D301          1
D302          1
D303          1
D304          1
D305          1
D306          1
D307          1
D308          1
D309          1
D310          1
D311          1
D312          1
D313          1
D314          1
D315          1
D316          1
D317          1
D318          1
D319          1
D320          1
D321          1
D322          1
D323          1
D324          1
D325          1
D326          1
D327          1
D328          1
D329          1
D330          1
D331          1
D332          1
D333          1
D334          1
D335          1
D336          1
D337          1
D338          1
D339          1
D340          1
D341          1
D342          1
D343          1
D344          1
D345          1
D346          1
D347          1
D348          1
D349          1
D350          1
D351          1
D352          1
D353          1
D354          1
D355          1
D356          1
D357          1
D358          1
D359          1
D360          1
D361          1
D362          1
D363          1
D364          1
D365          1
D366          1
D367          1
D368          1
D369          1
D370          1
D371          1
D372          1
D373          1
D374          1
D375          1
D376          1
D377          1
D378          1
D379          1
D380          1
D381          1
D382          1
D383          1
D384          1
D385          1
D386          1
D387          1
D388          1
D389          1
D390          1
D391          1
D392          1
D393          1
D394          1
D395          1
D396          1
D397          1
D398          1
D399          1
D400          1
D401          1
D402          1
D403          1
D404          1
D405          1
D406          1
D407          1
D408          1
D409          1
D410          1
D411          1
D412          1
D413          1
D414          1
D415          1
D416          1
D417          1
D418          1
D419          1
D420          1
D421          1
D422          1
D423          1
D424          1
D425          1
D426          1
D427          1
D428          1
D429          1
D430          1
D431          1
D432          1
D433          1
D434          1
D435          1
D436          1
D437          1
D438          1
D439          1
D440          1
D441          1
D442          1
D443          1
D444          1
D445          1
D446          1
D447          1
D448          1
D449          1
D450          1
D451          1
D452          1
D453          1
D454          1
D455          1
D456          1
D457          1
D458          1
D459          1
D460          1
D461          1
D462          1
D463          1
D464          1
D465          1
D466          1
D467          1
D468          1
D469          1
D470          1
D471          1
D472          1
D473          1
D474          1
D475          1
D476          1
D477          1
D478          1
D479          1
D480          1
D481          1
D482          1
D483          1
D484          1
D485          1
D486          1
D487          1
D488          1
D489          1
D490          1
D491          1
D492          1
D493          1
D494          1
D495          1
D496          1
D497          1
D498          1
D499          1
D500          1
D501          1
D502          1
D503          1
D504          1
D505          1
D506          1
D507          1
D508          1
D509          1
D510          1
D511          1
D512          1
D513          1
D514          1
D515          1
D516          1
D517          1
D518          1
D519          1
D520          1
D521          1
D522          1
D523          1
D524          1
D525          1
D526          1
D527          1
D528          1
D529          1
D530          1
D531          1
D532          1
D533          1
D534          1
D535          1
D536          1
D537          1
D538          1
D539          1
D540          1
D541          1
D542          1
D543          1
D544          1
D545          1
D546          1
D547          1
D548          1
D549          1
D550          1
D551          1
D552          1
D553          1
D554          1
D555          1
D556          1
D557          1
D558          1
D559          1
D560          1
D561          1
D562          1
D563          1
D564          1
D565          1
D566          1
D567          1
D568          1
D569          1
D570          1
D571          1
D572          1
D573          1
D574          1
D575          1
D576          1
D577          1
D578          1
D579          1
D580          1
D581          1
D582          1
D583          1
D584          1
D585          1
D586          1
D587          1
D588          1
D589          1
D590          1
D591          1
D592          1
D593          1
D594          1
D595          1
D596          1
D597          1
D598          1
D599          1
D600          1
D601          1
D602          1
D603          1
D604          1
D605          1
D606          1
D607          1
D608          1
D609          1
D610          1
D611          1
D612          1
D613          1
D614          1
D615          1
D616          1
D617          1
D618          1
D619          1
D620          1
D621          1
D622          1
D623          1
D624          1
D625          1
D626          1
D627          1
D628          1
D629          1
D630          1
D631          1
D632          1
D633          1
D634          1
D635          1
D636          1
D637          1
D638          1
D639          1
D640          1
D641          1
D642          1
D643          1
D644          1
D645          1
D646          1
D647          1
D648          1
D649          1
D650          1
D651          1
D652          1
D653          1
D654          1
D655          1
D656          1
D657          1
D658          1
D659          1
D660          1
D661          1
D662          1
D663          1
D664          1
D665          1
D666          1
D667          1
D668          1
D669          1
D670          1
D671          1
D672          1
D673          1
D674          1
D675          1
D676          1
D677          1
D678          1
D679          1
D680          1
D681          1
D682          1
D683          1
D684          1
D685          1
D686          1
D687          1
D688          1
D689          1
D690          1
D691          1
D692          1
D693          1
D694          1
D695          1
D696          1
D697          1
D698          1
D699          1
D700          1
D701          1
D702          1
D703          1
D704          1
D705          1
D706          1
D707          1
D708          1
D709          1
D710          1
D711          1
D712          1
D713          1
D714          1
D715          1
D716          1
D717          1
D718          1
D719          1
D720          1
D721          1
D722          1
D723          1
D724          1
D725          1
D726          1
D727          1
D728          1
D729          1
D730          1
D731          1
D732          1
D733          1
D734          1
D735          1
D736          1
D737          1
D738          1
D739          1
D740          1
D741          1
D742          1
D743          1
D744          1
D745          1
D746          1
D747          1
D748          1
D749          1
D750          1
D751          1
D752          1
D753          1
D754          1
D755          1
D756          1
D757          1
D758          1
D759          1
D760          1
D761          1
D762          1
D763          1
D764          1
D765          1
D766          1
D767          1
D768          1
D769          1
D770          1
D771          1
D772          1
D773          1
D774          1
D775          1
D776          1
D777          1
D778          1
D779          1
D780          1
D781          1
D782          1
D783          1
D784          1
D785          1
D786          1
D787          1
D788          1
D789          1
D790          1
D791          1
D792          1
D793          1
D794          1
D795          1
D796          1
D797          1
D798          1
D799          1
D800          1
D801          1
D802          1
D803          1
D804          1
D805          1
D806          1
D807          1
D808          1
D809          1
D810          1
D811          1
D812          1
D813          1
D814          1
D815          1
D816          1
D817          1
D818          1
D819          1
D820          1
D821          1
D822          1
D823          1
D824          1
D825          1
D826          1
D827          1
D828          1
D829          1
D830          1
D831          1
D832          1
D833          1
D834          1
D835          1
D836          1
D837          1
D838          1
D839          1
D840          1
D841          1
D842          1
D843          1
D844          1
D845          1
D846          1
D847          1
D848          1
D849          1
D850          1
D851          1
D852          1
D853          1
D854          1
D855          1
D856          1
D857          1
D858          1
D859          1
D860          1
D861          1
D862          1
D863          1
D864          1
D865          1
D866          1
D867          1
D868          1
D869          1
D870          1
D871          1
D872          1
D873          1
D874          1
D875          1
D876          1
D877          1
D878          1
D879          1
D880          1
D881          1
D882          1
D883          1
D884          1
D885          1
D886          1
D887          1
D888          1
D889          1
D890          1
D891          1
D892          1
D893          1
D894          1
D895          1
D896          1
D897          1
D898          1
D899          1
D900          1
D901          1
D902          1
D903          1
D904          1
D905          1
D906          1
D907          1
D908          1
D909          1
D910          1
D911          1
D912          1
D913          1
D914          1
D915          1
D916          1
D917          1
D918          1
D919          1
D920          1
D921          1
D922          1
D923          1
D924          1
D925          1
D926          1
D927          1
D928          1
D929          1
D930          1
D931          1
D932          1
D933          1
D934          1
D935          1
D936          1
D937          1
D938          1
D939          1
D940          1
D941          1
D942          1
D943          1
D944          1
D945          1
D946          1
D947          1
D948          1
D949          1
D950          1
D951          1
D952          1
D953          1
D954          1
D955          1
D956          1
D957          1
D958          1
D959          1
D960          1
D961          1
D962          1
D963          1
D964          1
D965          1
D966          1
D967          1
D968          1
D969          1
D970          1
D971          1
D972          1
D973          1
D974          1
D975          1
D976          1
D977          1
D978          1
D979          1
D980          1
D981          1
D982          1
D983          1
D984          1
D985          1
D986          1
D987          1
D988          1
D989          1
D990          1
D991          1
D992          1
D993          1
D994          1
D995          1
D996          1
D997          1
D998          1
D999          1
D1000         1
```

```
===== CHANNEL f1 =====
NUC1          1H
P1            14.50 usec
PL1           0.00 dB
PL1W          10.87646866 W
SFO1          400.1324710 MHz
SI            32768
SF            400.1300092 MHz
WDW           EM
SSB           0
LB            0.30 Hz
GB            0
PC            1.00
```

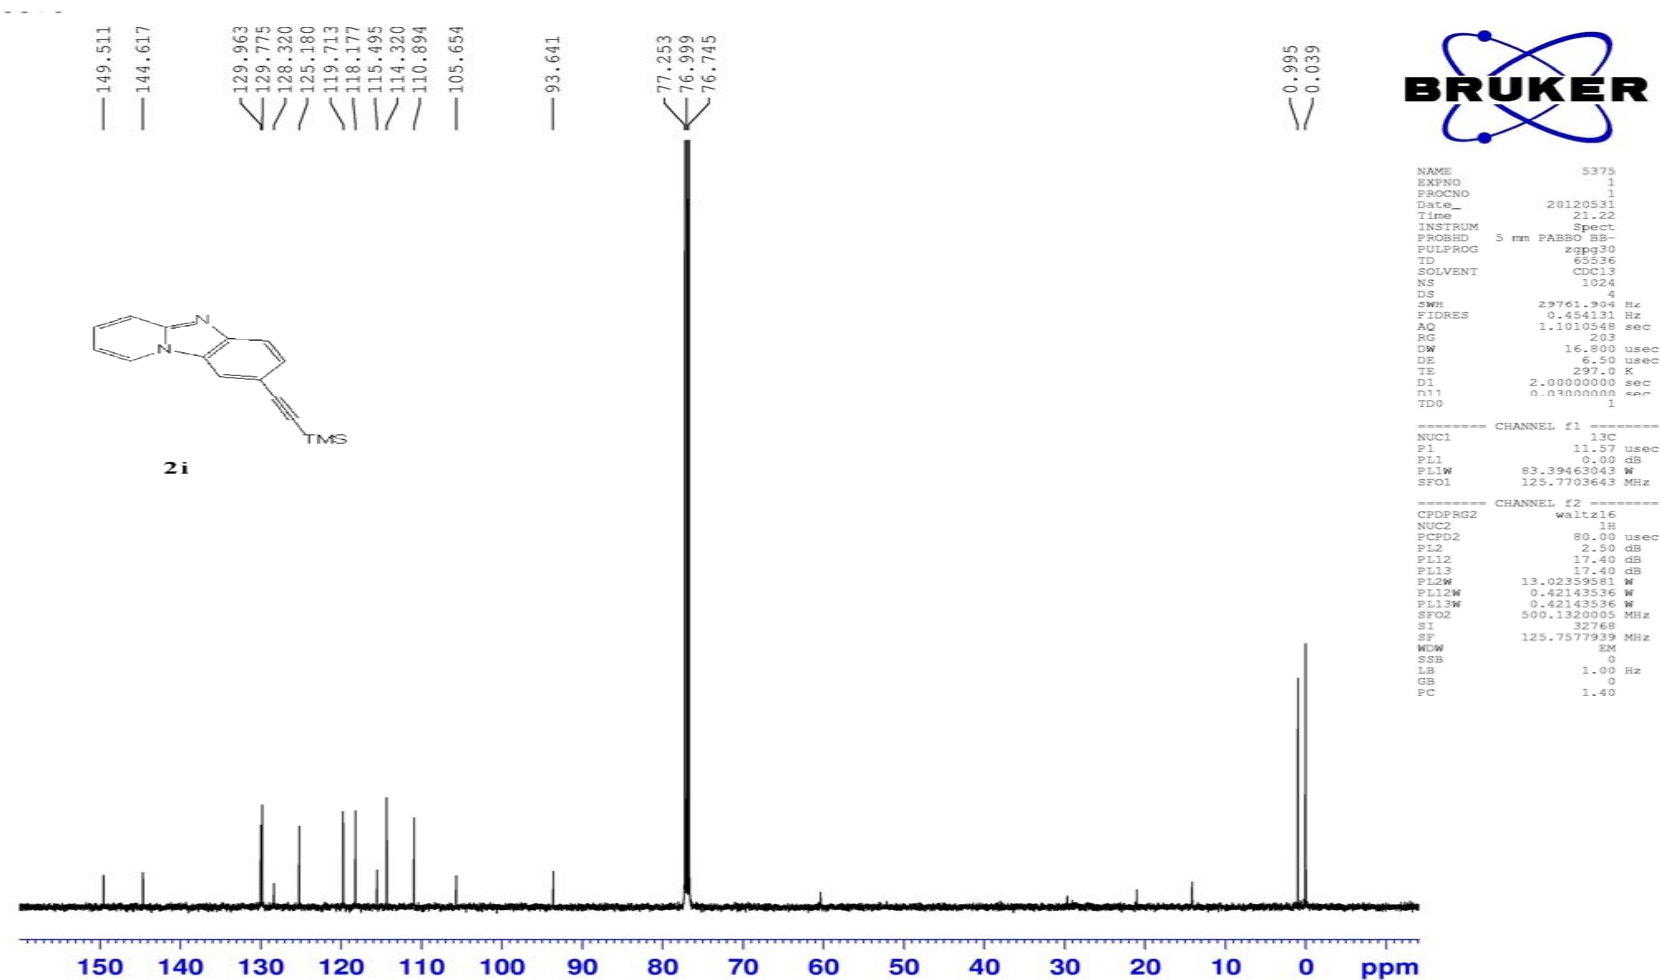



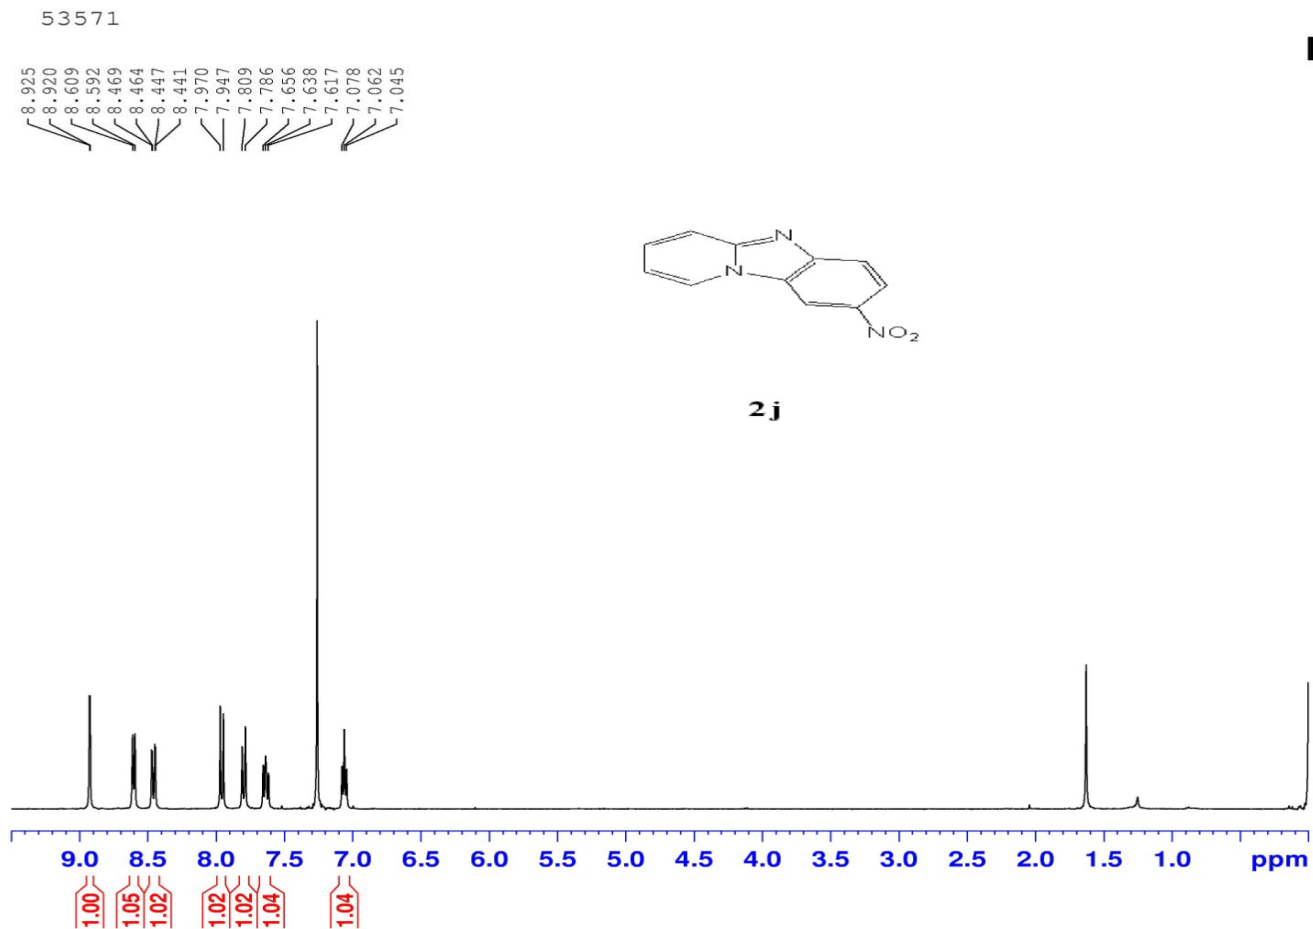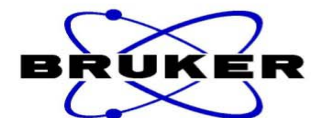

```
NAME          H Z1
EXPNO         19
PROCNO        1
Date_         20120217
Time          4.27
INSTRUM       spect
PROBHD        5 mm PABBO BB-
PULPROG       zg30
TD            65536
SOLVENT       CDCl3
NS            16
DS            2
SWH           8278.146 Hz
FIDRES        0.126314 Hz
AQ            3.9584243 sec
RG            362
DW            60.400 usec
DE            6.50 usec
TE            296.3 K
D1            1.0000000 sec
TDO           1
```

```
===== CHANNEL f1 =====
NUC1          1H
P1            14.50 usec
PL1           0.00 dB
PL1W          10.87646866 W
SF01          400.1324710 MHz
SI            32768
SF            400.1300090 MHz
WDW           EM
SSB           0
LB            0.30 Hz
GB            0
PC            1.00
```

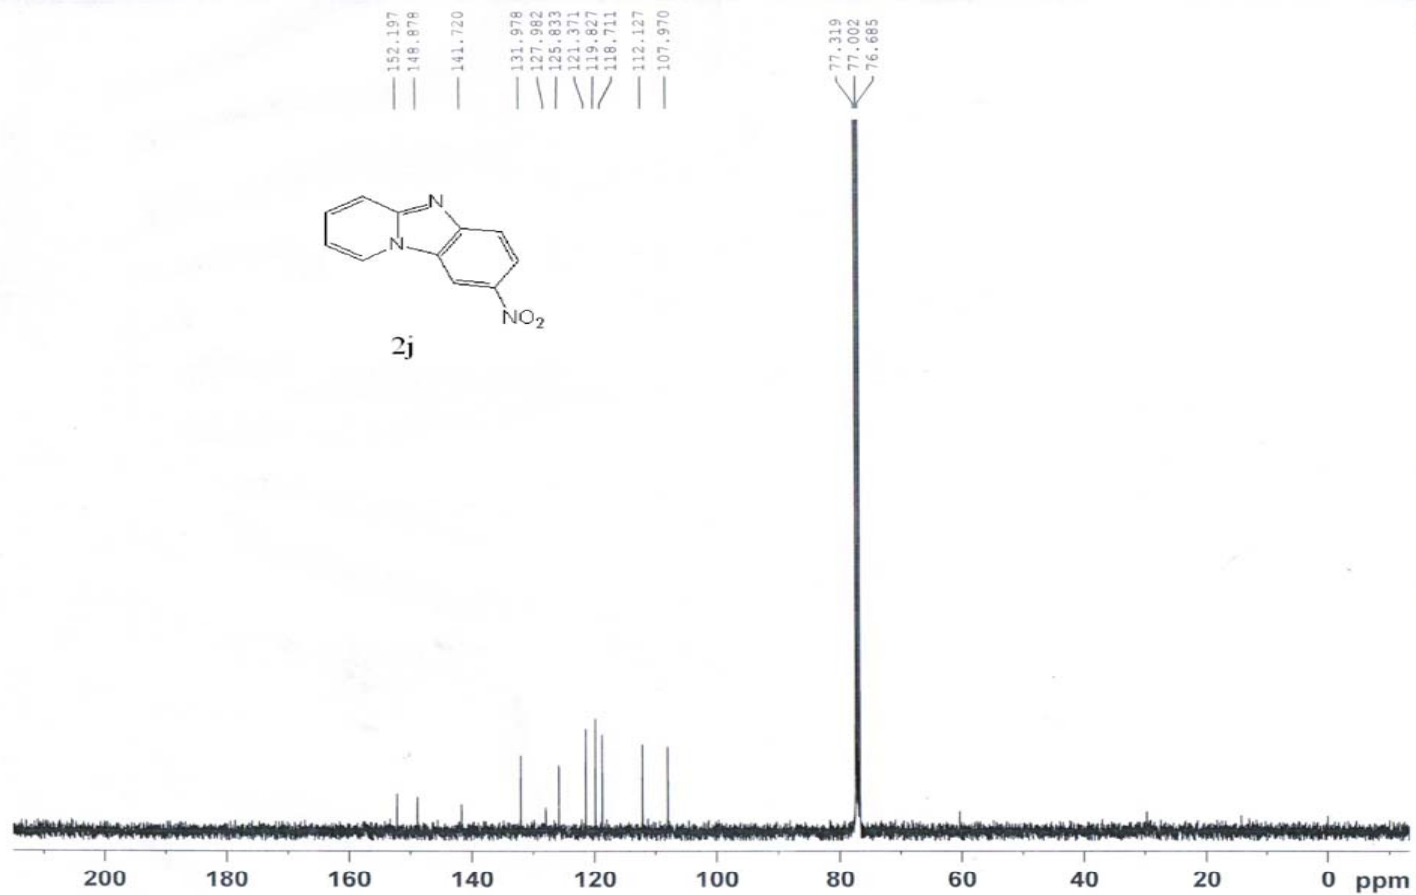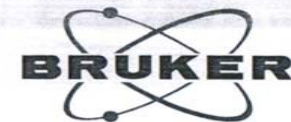

NAME Jun14-2012  
EXPNO 53  
PROCNO 1  
Date\_ 20120615  
Time 9.01  
INSTRUM spect  
PROBHD 5 mm PABBO BB-  
PULPROG zgpg30  
TD 65536  
SOLVENT CDCl3  
NS 479  
DS 4  
SWH 23980.814 Hz  
FIDRES 0.365516 Hz  
AQ 1.3664756 sec  
RG 812.7  
DW 20.850 usec  
DE 6.50 usec  
TE 673.2 K  
D1 2.0000000 sec  
D11 0.0300000 sec  
TD0 1

----- CHANNEL f1 -----  
NUC1 13C  
P1 10.25 usec  
PL1 0.00 dB  
PL1W 38.68305206 W  
SFO1 100.6228298 MHz

----- CHANNEL f2 -----  
CTDPRG2 waltz16  
NUC2 1H  
PCPD2 80.00 usec  
PL2 0.00 dB  
PL12 14.54 dB  
PL13 0.00 dB  
PL2W 10.87646866 W  
PL12W 0.38237360 W  
PL13W 10.87646866 W  
SFO2 400.1316005 MHz  
SI 32768  
SF 100.6127617 MHz  
WDW EM  
SSB 0  
LB 1.00 Hz  
GB 0  
PC 1.40

hym53372

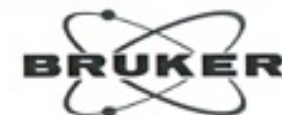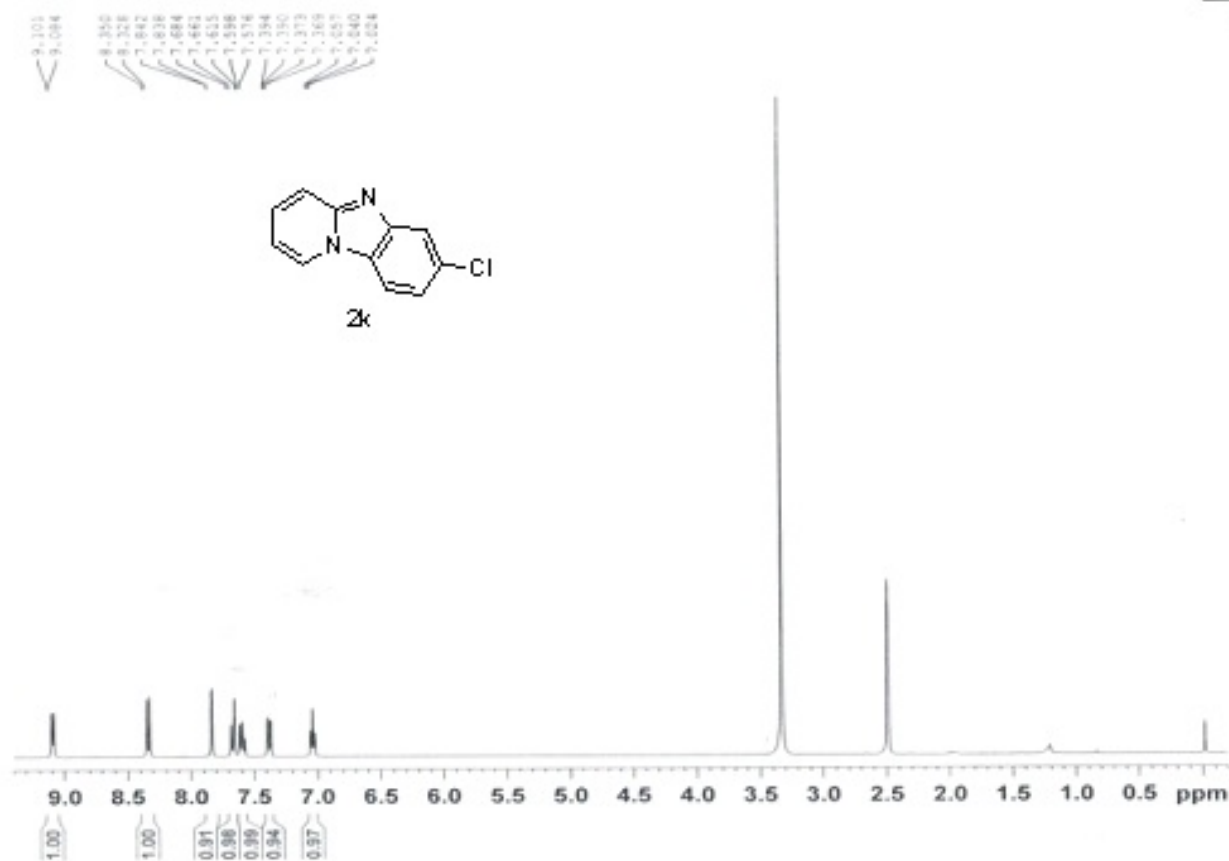

```
NAME      hym_218122
EXPNO     102
PROCNO    3332
DATA      20120525
TIME      19.18
INSTRUM   spect
PROBHD    5 mm QNP1H
PULPROG   zgpg30
TD         65536
SOLVENT   DMSO
NS         16
DS         2
SWH        8174.126 MHz
F2       0.274118 MHz
AQ         3.5584210 sec
RG         312.5
EQ         0.0000000
TE         300.2 K
SI         1.0000000 sec
TD0        1
----- CHANNEL f1 -----
NUC1       13
P1         12.000000
PL1        0.000000
PL12       10.000000 MHz
SFO1       400.146410 MHz
D1         0.274118
SFO2       400.146410 MHz
NUC2       1H
P2         0.000000
PL2        0.000000
SFO3       400.146410 MHz
LOR        0
SR         0.100000
GB         0
PC         1.00
```

53372

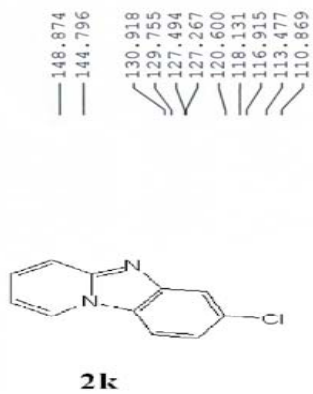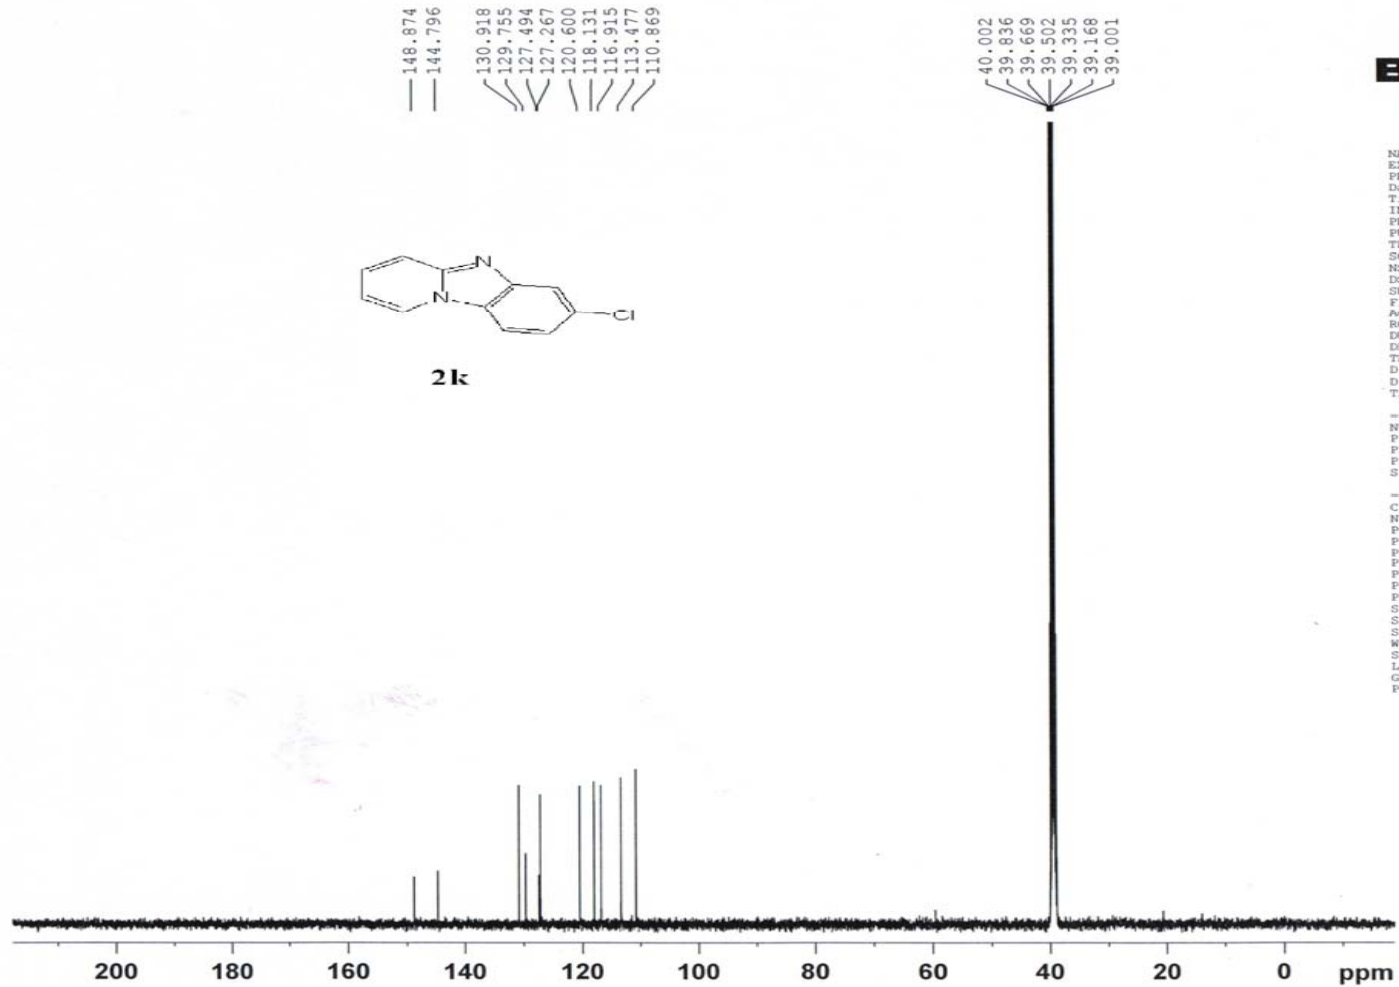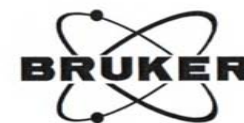

```
NAME          53372
EXPNO         1
PROCNO        1
Date_         20120604
Time_         11.10
INSTRUM       Spect
PROBHD        5 mm PABBO BB-
PULPROG       zgpg30
TD            65536
SOLVENT       DMSO
NS            988
DS            4
SWH           29761.904 Hz
FIDRES        0.454131 Hz
AQ            1.1010548 sec
RG            203
DW            16.800 usec
DE            6.50 usec
TE            297.5 K
D1            2.00000000 sec
D11           0.03000000 sec
TDO           1

----- CHANNEL f1 -----
NUC1          13C
P1            11.57 usec
PL1           0.00 dB
PL1W          83.39463043 W
SFO1          125.7703643 MHz

----- CHANNEL f2 -----
CPDPRG2       waltz16
NUC2          1H
PCPD2         80.00 usec
PL2           2.50 dB
PL12          17.40 dB
FL13          17.40 dB
PL2W          13.02359581 W
FL12W         0.42143536 W
PL13W         0.42143536 W
SFO2          500.1320005 MHz
SI            32768
SF            125.7578537 MHz
WDW           EM
SSB           0
LB            1.00 Hz
GB            0
PC            1.40
```

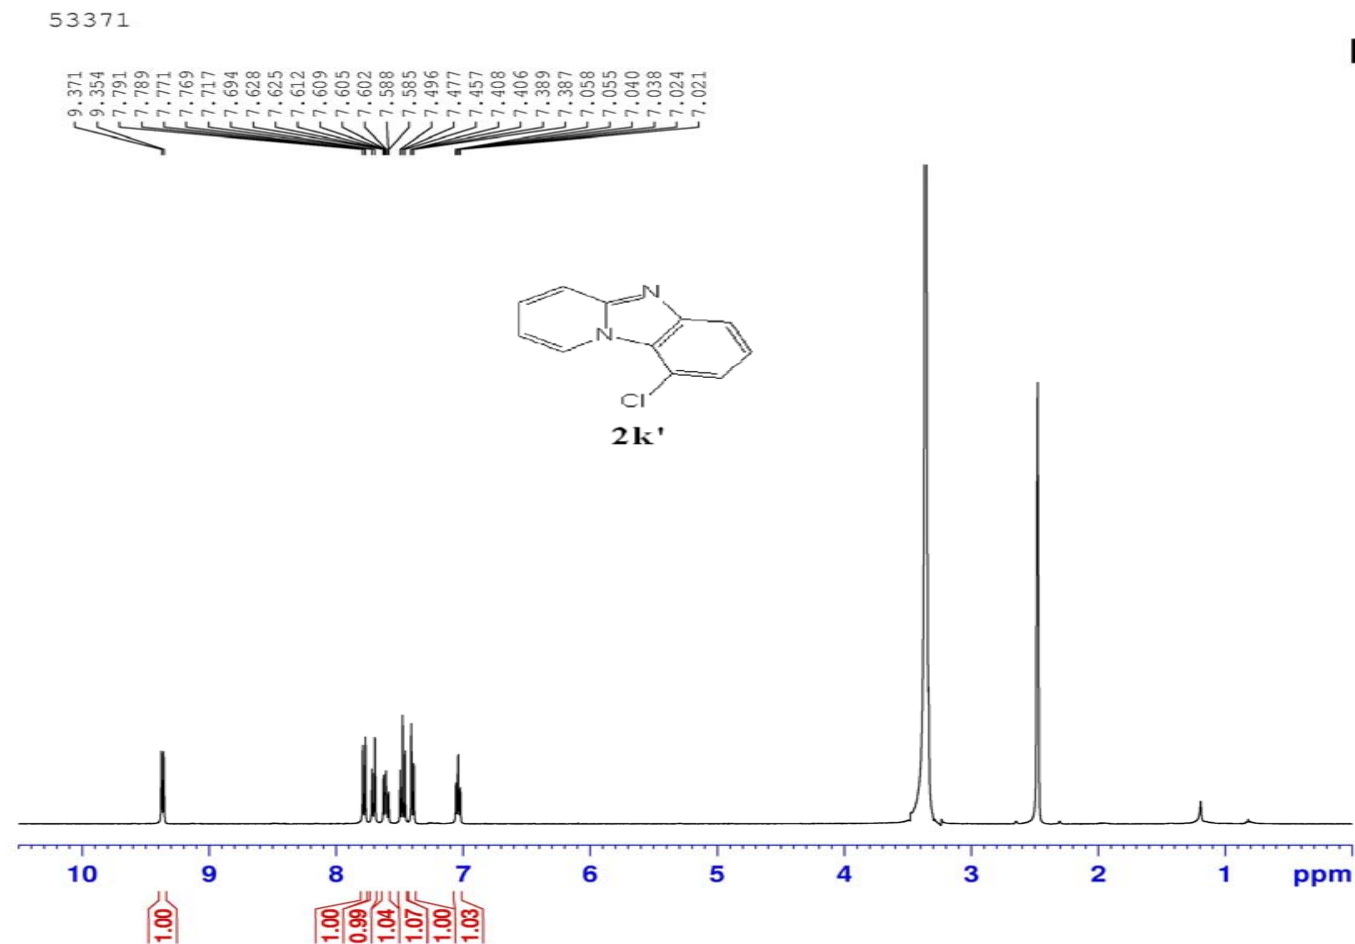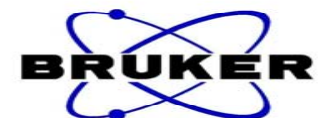

```
NAME          New Folder
EXPNO         28
PROCNO        1
Date_         20120221
Time         8.09
INSTRUM       spect
PROBHD        5 mm PABBO BB-
PULPROG       zg30
TD            65536
SOLVENT       DMSO
NS            16
DS            2
SWH           8278.146 Hz
FIDRES        0.126314 Hz
AQ            3.9584243 sec
RG            161.3
DW            60.400 usec
DE            6.50 usec
TE            297.7 K
D1            1.0000000 sec
TDO           1
```

```
----- CHANNEL f1 -----
NUC1           1H
P1             14.50 usec
PL1            0.00 dB
PL1W          10.07646066 W
SF01          400.1324710 MHz
SI             32768
SF            400.1300120 MHz
WDW            EM
SSB            0
LB             0.30 Hz
GB             0
PC             1.00
```

53371

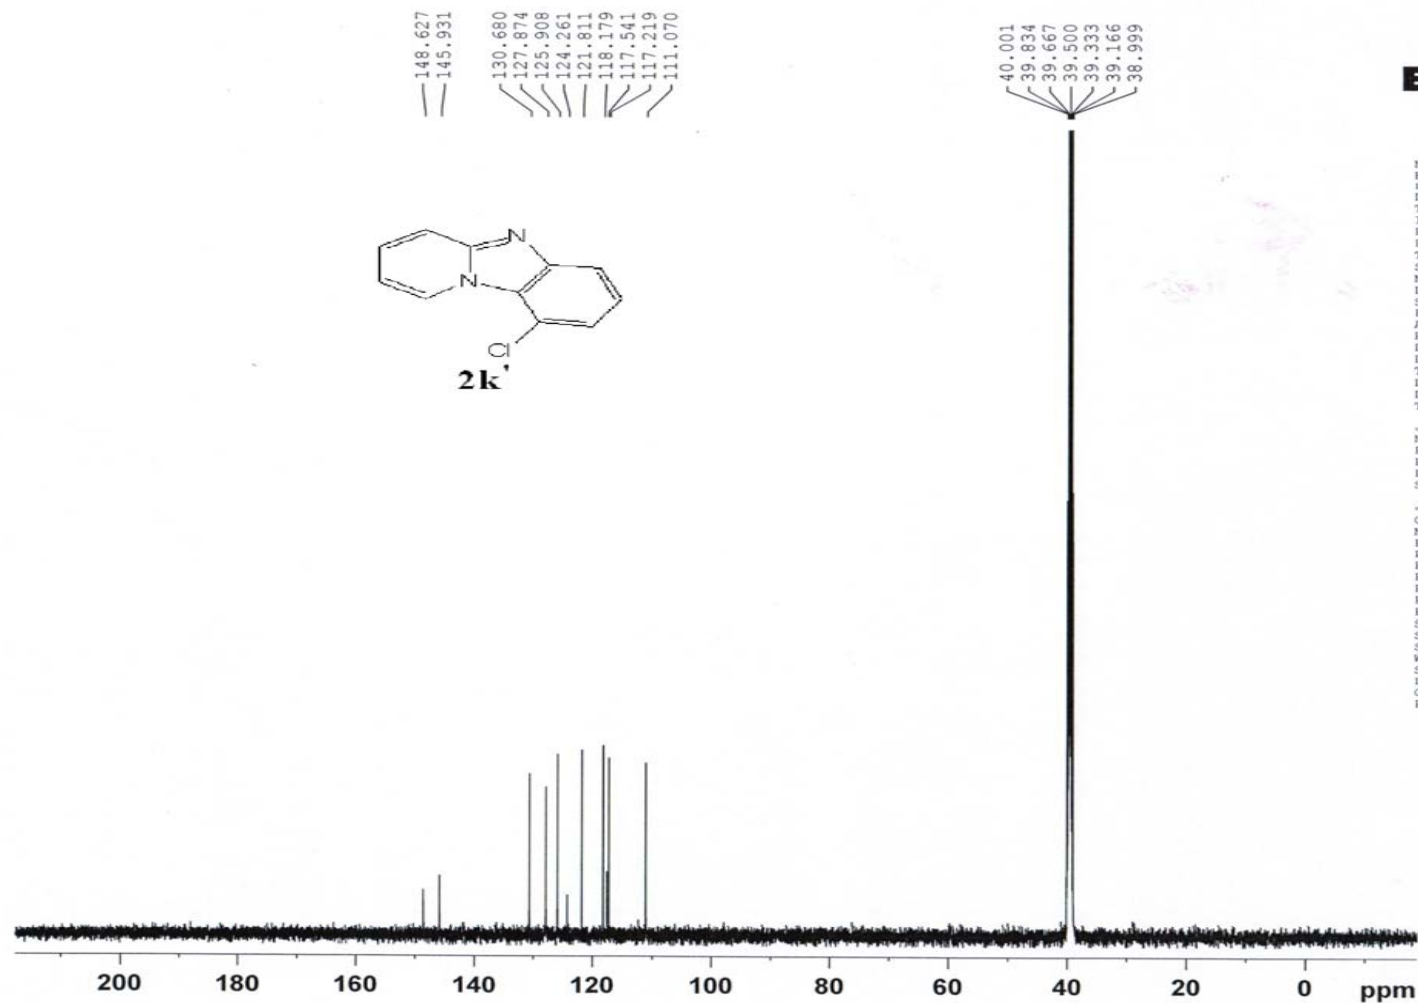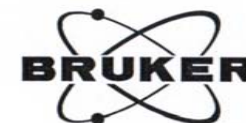

NAME 53371  
EXPNO 1  
PROCNO 1  
Date 20120604  
Time 10.11  
INSTRUM Spect  
PROBHD 5 mm PABBO BB-  
PULPROG zgpg30  
TD 65536  
SOLVENT DMSO  
NS 1024  
DS 4  
SWH 29761.904 Hz  
FIDRES 0.454131 Hz  
AQ 1.1010548 sec  
RG 203  
DW 16.800 usec  
DE 6.50 usec  
TE 297.6 K  
D1 2.00000000 sec  
D11 0.03000000 sec  
TD0 1

----- CHANNEL f1 -----  
NUC1 13C  
P1 11.57 usec  
PL1 0.00 dB  
PL1W 83.39463043 W  
SFO1 125.7703643 MHz

----- CHANNEL f2 -----  
CPDPRG2 waltz16  
NUC2 1H  
PCPD2 80.00 usec  
PL2 2.50 dB  
PL12 17.40 dB  
PL13 17.40 dB  
PL2W 13.02359581 W  
PL12W 0.42143536 W  
PL13W 0.42143536 W  
SFO2 500.1320005 MHz  
SI 32768  
SF 125.7578516 MHz  
EM  
SSB 0  
LB 1.00 Hz  
GB 0  
PC 1.40

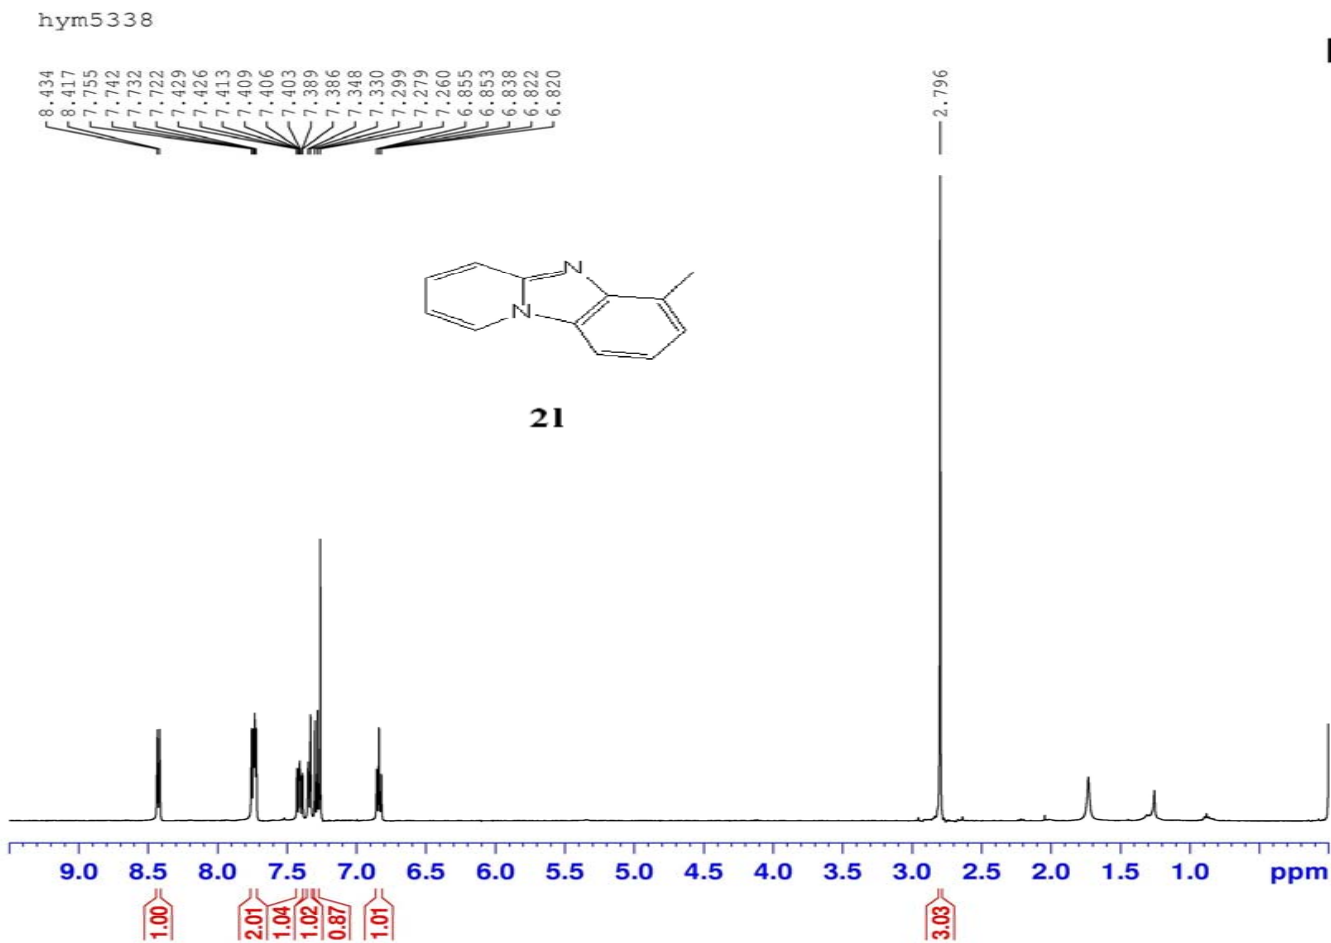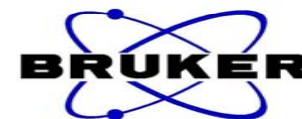

```
NAME          H PU
EXPNO         69
PROCNO        1
Date_         20111213
Time          15.25
INSTRUM       spect
PROBHD        5 mm PABBO BB-
PULPROG       zg30
TD            65536
SOLVENT       CDC13
NS            16
DS            2
SWH           8278.146 Hz
FIDRES        0.126314 Hz
AQ            3.9584243 sec
RG            322.5
DW            60.400 usec
DE            6.50 usec
TE            296.9 K
D1            1.0000000 sec
TD0           1

----- CHANNEL f1 -----
NUC1          1H
P1            14.50 usec
PL1           0.00 dB
PLLW          10.87646866 W
SFO1          400.1324710 MHz
SI            32768
SF            400.1300093 MHz
WDW           EM
SSB           0
LB            0.30 Hz
GB            0
PC            1.00
```

5338

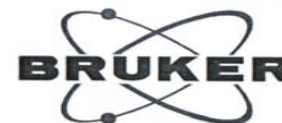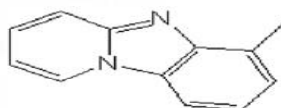

21

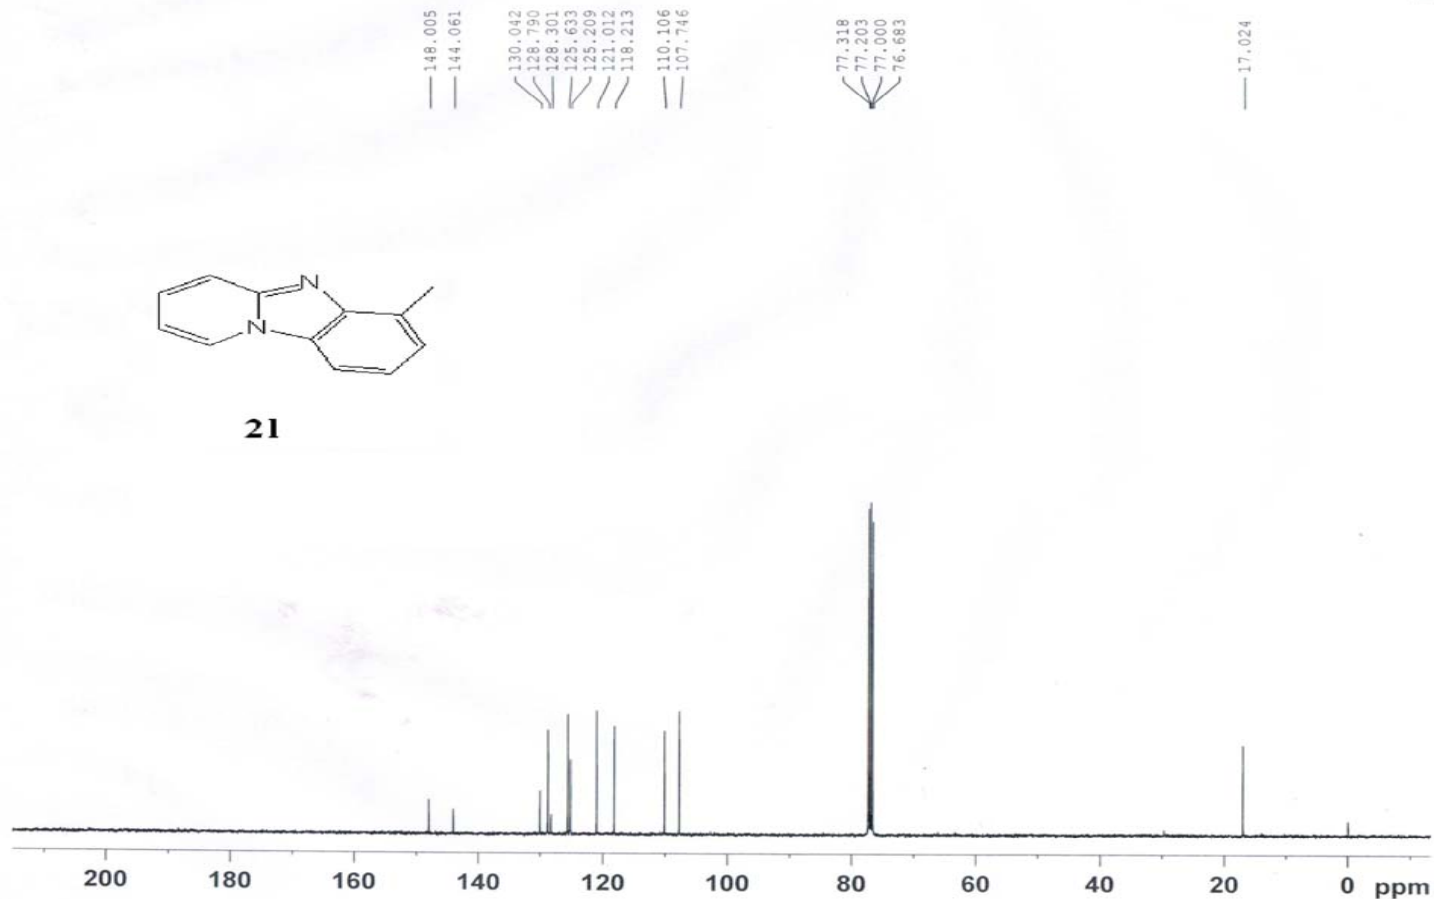

```
NAME May30-2012
EXPNO 61
PROCNO 1
Date_ 20120531
Time 1.35
INSTRUM spect
PROBHD 5 mm PABBO BB-
PULPROG zgpg30
TD 65536
SOLVENT CDCl3
NS 1024
DS 4
SWH 23980.814 Hz
FIDRES 0.365918 Hz
AQ 1.3664756 sec
RG 812.7
DW 20.850 usec
DE 6.50 usec
TE 673.2 K
D1 2.0000000 sec
D11 0.0300000 sec
TDO 1
----- CHANNEL f1 -----
NUC1 13C
P1 10.25 usec
PL1 0.00 dB
PL1W 38.68305206 W
SFO1 100.6228298 MHz
----- CHANNEL f2 -----
CPDPRG2 waltz16
NUC2 1H
PCPD2 80.00 usec
PL2 0.00 dB
PL12 14.54 dB
PL13 0.00 dB
PL2W 10.87646866 W
PL12W 0.38237360 W
PL13W 10.87646866 W
SFO2 400.1316005 MHz
SI 32768
SF 100.6127646 MHz
WDW EM
SSB 0
LB 1.00 Hz
GB 0
PC 1.40
```



hym5334

9.108  
9.091  
8.168  
8.163  
8.159  
8.154  
8.149  
8.145  
7.728  
7.705  
7.640  
7.637  
7.623  
7.620  
7.617  
7.614  
7.600  
7.597  
7.347  
7.342  
7.333  
7.315  
7.311  
7.080  
7.078  
7.061  
7.046  
7.044

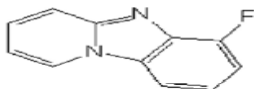

2m

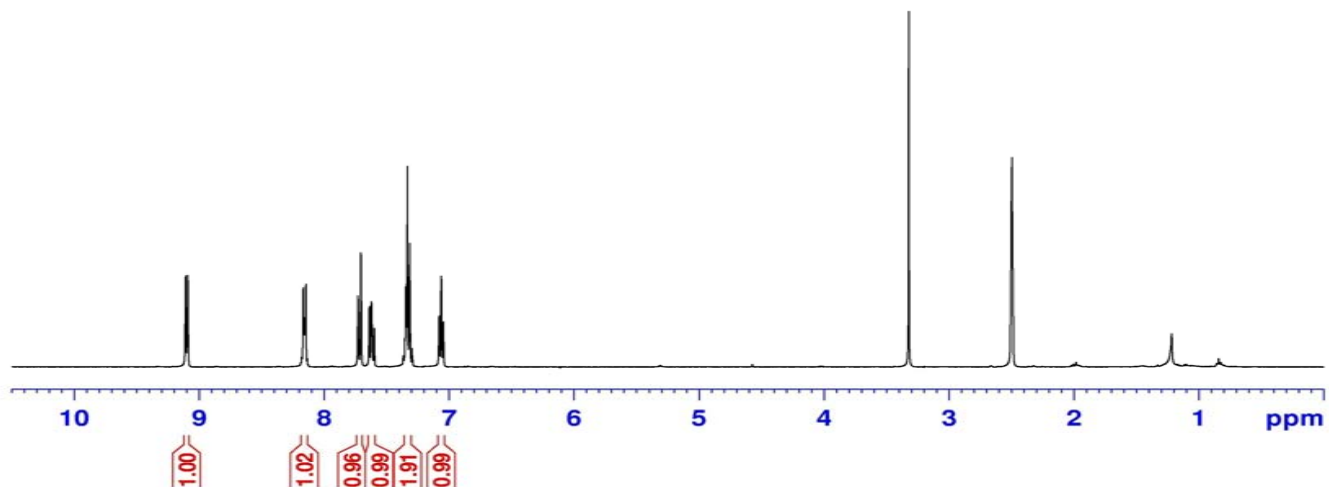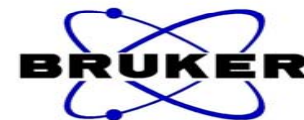

```
NAME          H PU
EXPNO         66
PROCNO        1
Date_         20111210
Time          15.13
INSTRUM       spect
PROBHD        5 mm PABBO BB-
PULPROG       zg30
TD            65536
SOLVENT       DMSO
NS            16
DS            2
SWH           8278.146 Hz
FIDRES        0.126314 Hz
AQ            3.9584243 sec
RG            322.5
DW            60.400 usec
DE            6.50 usec
TE            297.8 K
D1            1.0000000 sec
TDO           1
```

```
----- CHANNEL f1 -----
NUC1          1H
P1            14.50 usec
PL1           0.00 dB
PL1W          10.87646866 W
SFO1          400.1324710 MHz
SI            32768
SF            400.1300043 MHz
WDW           EM
SSB           0
LB            0.30 Hz
GB            0
PC            1.00
```

5334

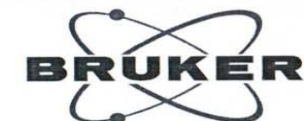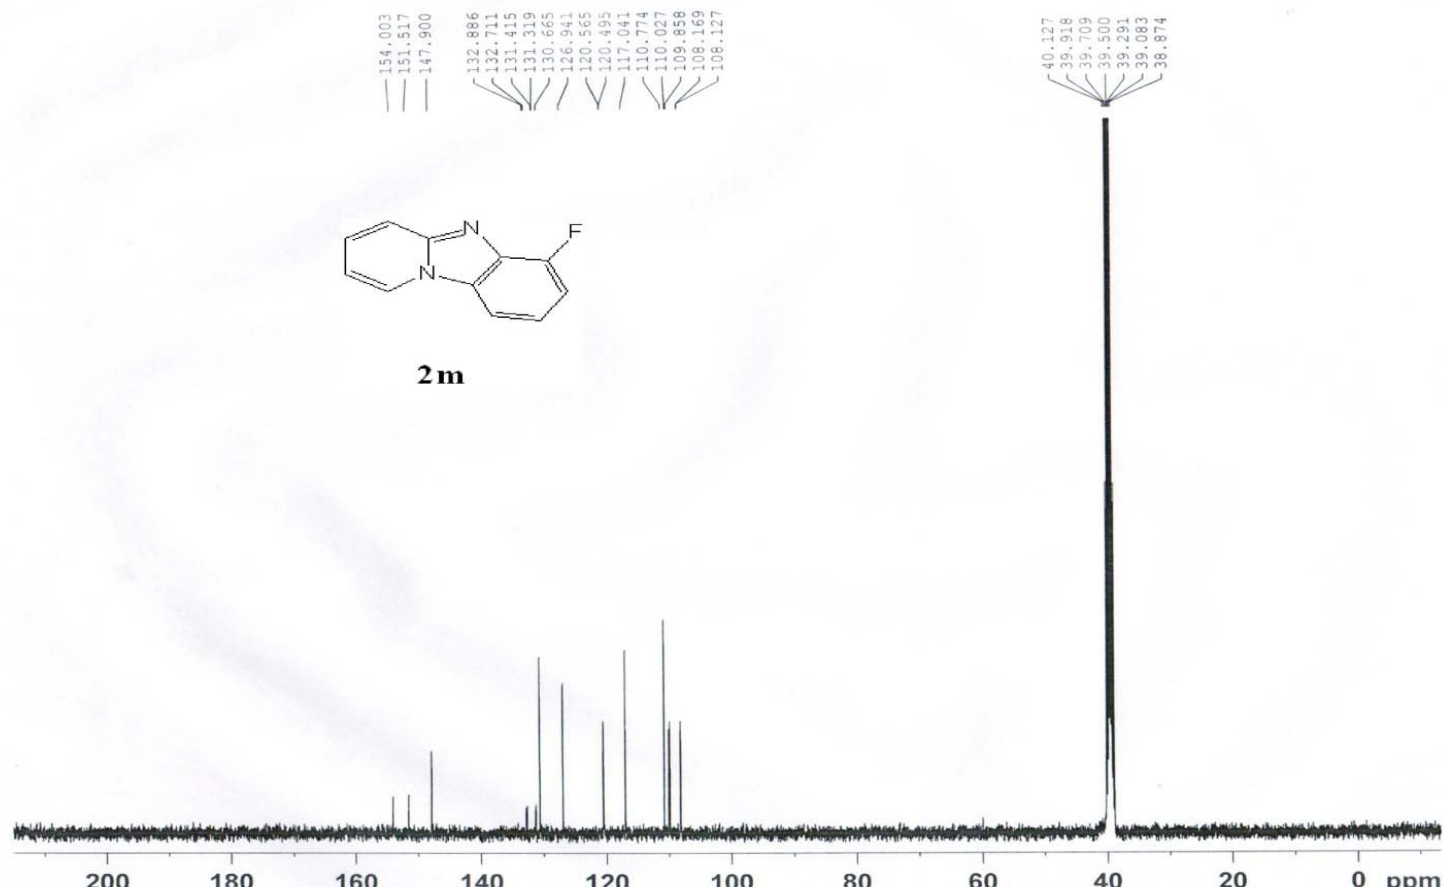

NAME May30-2012  
EXPNO 59  
PROCNO 1  
Date\_ 20120530  
Time 23.27  
INSTRUM spect  
PROBHD 5 mm PABBO BB-  
PULPROG zgpg30  
TD 65536  
SOLVENT DMSO  
NS 1024  
DS 4  
SWH 23980.814 Hz  
FIDRES 0.365918 Hz  
AQ 1.3664756 sec  
RG 1024  
DW 20.850 usec  
DE 6.50 usec  
TE 673.2 K  
D1 2.00000000 sec  
D11 0.03000000 sec  
TD0 1

----- CHANNEL f1 -----  
NUC1 13C  
P1 10.25 usec  
PL1 0.00 dB  
PL1W 38.68305206 W  
SFO1 100.6228298 MHz

----- CHANNEL f2 -----  
CPDPRG2 waltz16  
NUC2 1H  
PCPD2 80.00 usec  
PL2 0.00 dB  
PL12 14.54 dB  
PL13 0.00 dB  
PL2W 10.07646866 W  
PL12W 0.38237360 W  
PL13W 10.87646866 W  
SFO2 400.1316005 MHz  
SI 32768  
SF 100.6126382 MHz  
WDW EM  
SSB 0  
LB 1.00 Hz  
GB 0  
PC 1.40

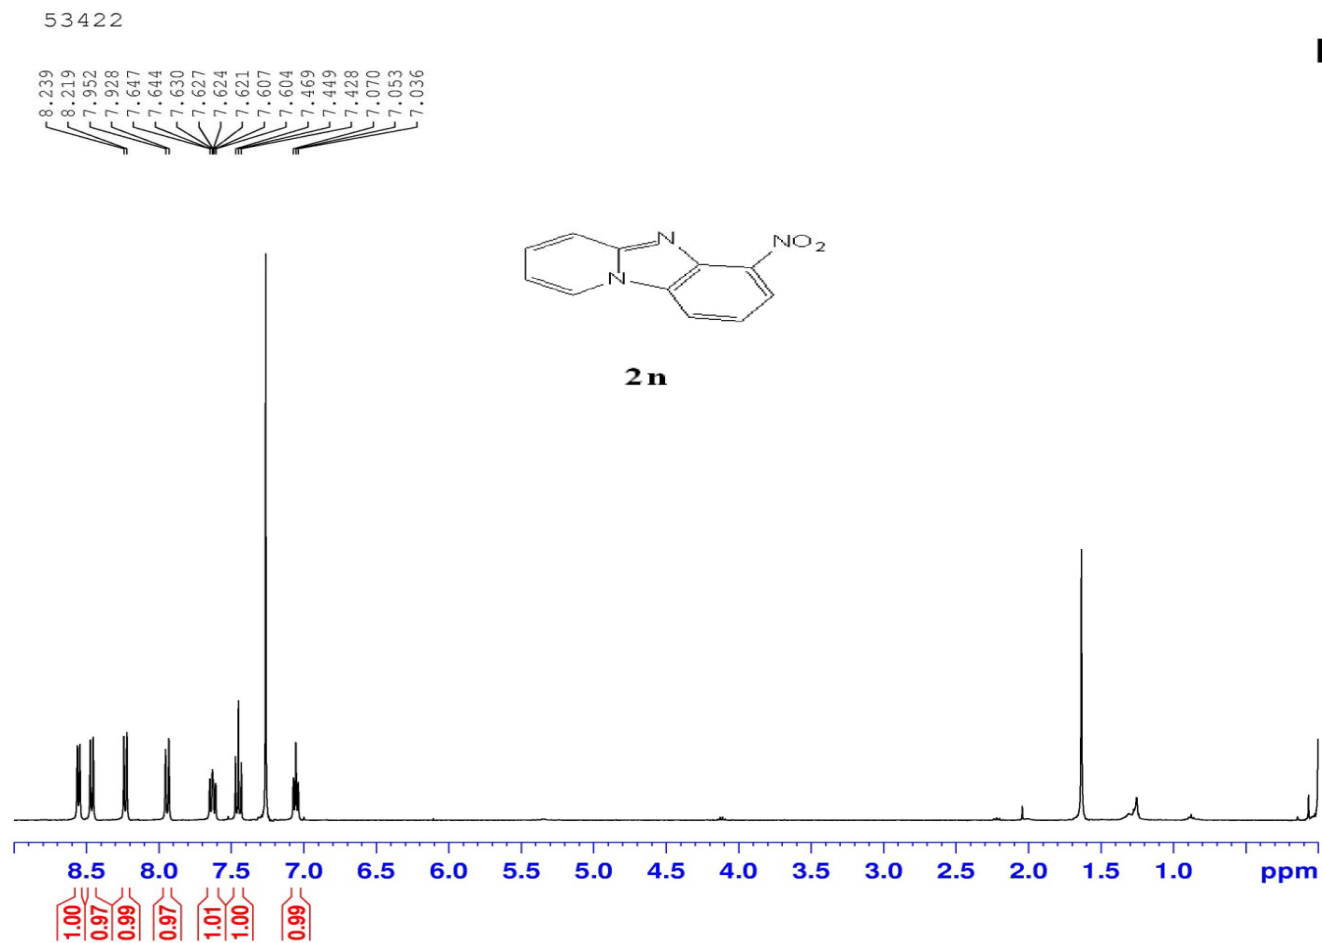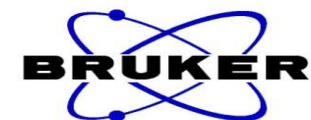

```
NAME          H ZI
EXPNO         29
PROCNO        1
Date_         20120222
Time          8.04
INSTRUM       spect
PROBHD        5 mm PABBO BB-
PULPROG       zg30
TD            65536
SOLVENT       CDCl3
NS            16
DS            2
SWH           8278.146 Hz
FIDRES        0.126314 Hz
AQ            3.9584243 sec
RG            456.1
DW            60.400 usec
DE            6.50 usec
TE            297.6 K
D1            1.0000000 sec
TDO           1
```

```
===== CHANNEL f1 =====
NUC1          1H
P1            14.50 usec
PL1           0.00 dB
PL1W          10.87646866 W
SFO1          400.1324710 MHz
SI            32768
SF            400.1300090 MHz
WDW           EM
SSB           0
LB            0.30 Hz
GB            0
PC            1.00
```

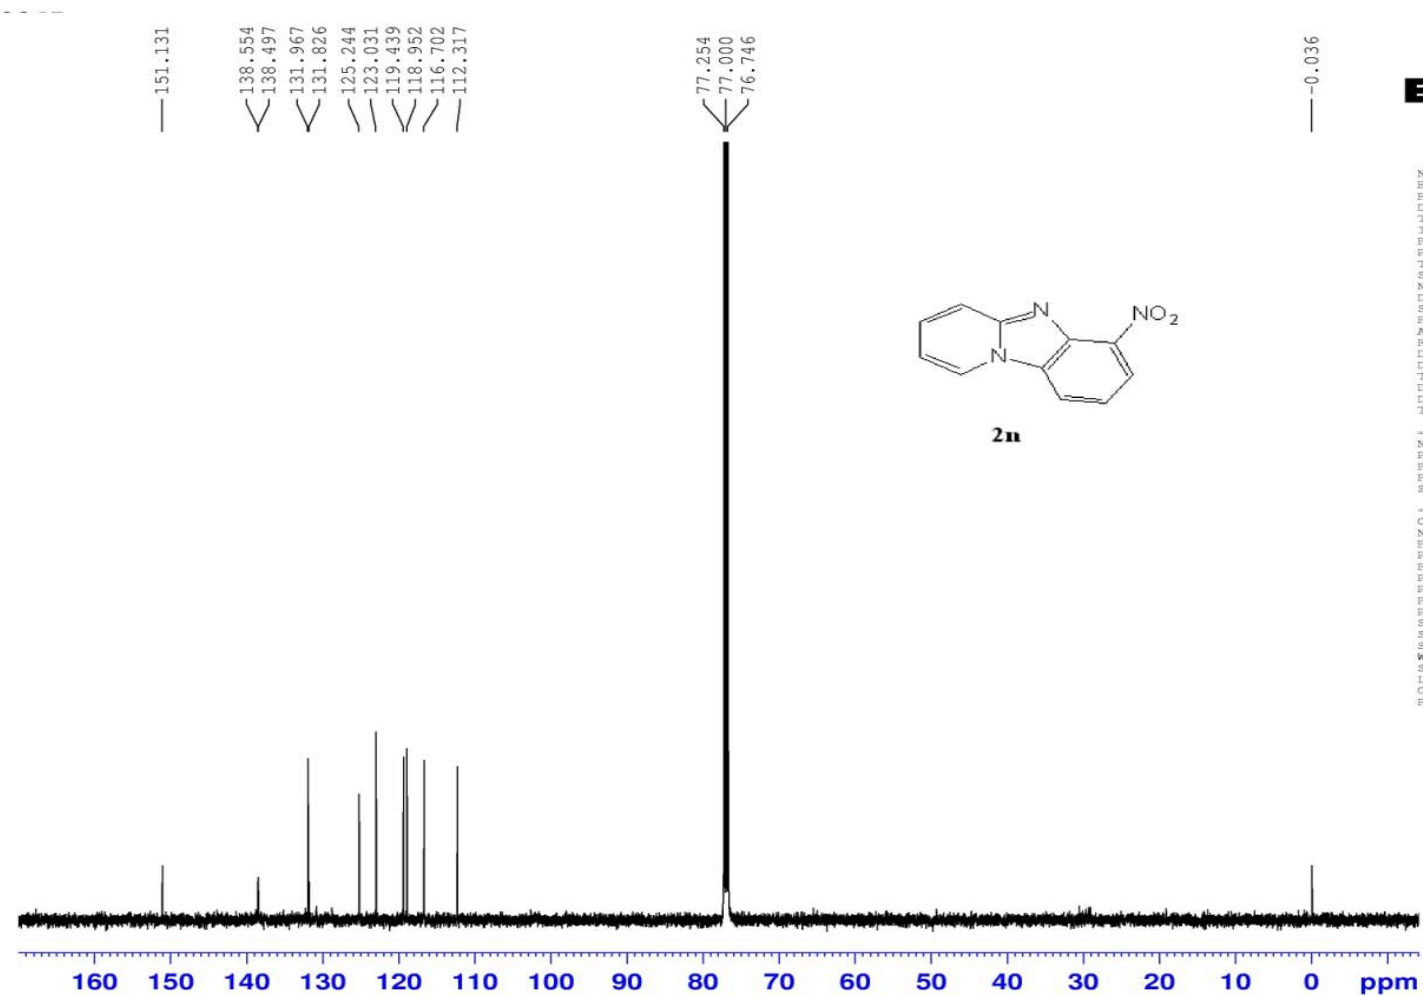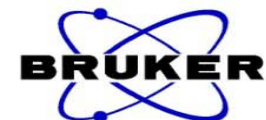

```
NAME          5342
EXPNO         2
PROCNO        1
Date_         20120704
Time          17.16
INSTRUM       Spect
PROBHD        5 mm PABBO BB-
PULPROG       zgpg30
TD            65536
SOLVENT       CDCl3
NS            1306
DS            4
SWH           29761.904 Hz
FIDRES        0.454131 Hz
AQ            1.1010548 sec
RG            203
DW            16.800 usec
DE            6.50 usec
TE            298.5 K
D1            2.0000000 sec
D11           0.0300000 sec
TD0           1

----- CHANNEL f1 -----
NUC1          13C
P1            11.57 usec
PL1           0.00 dB
PL1W          83.39463043 W
SFO1          125.7703643 MHz

----- CHANNEL f2 -----
CPDPRG2       waltz16
NUC2          1H
PCPD2         80.00 usec
PL2           2.50 dB
PL12          17.40 dB
PL13          17.40 dB
PL2W          13.02359581 W
PL12W         0.42143536 W
PL13W         0.42143536 W
SFO2          500.1320005 MHz
SI            32768
SF            125.7577936 MHz
WDW           EM
SSB           0
LB            1.00 Hz
GB            0
PC            1.40
```

hym5318

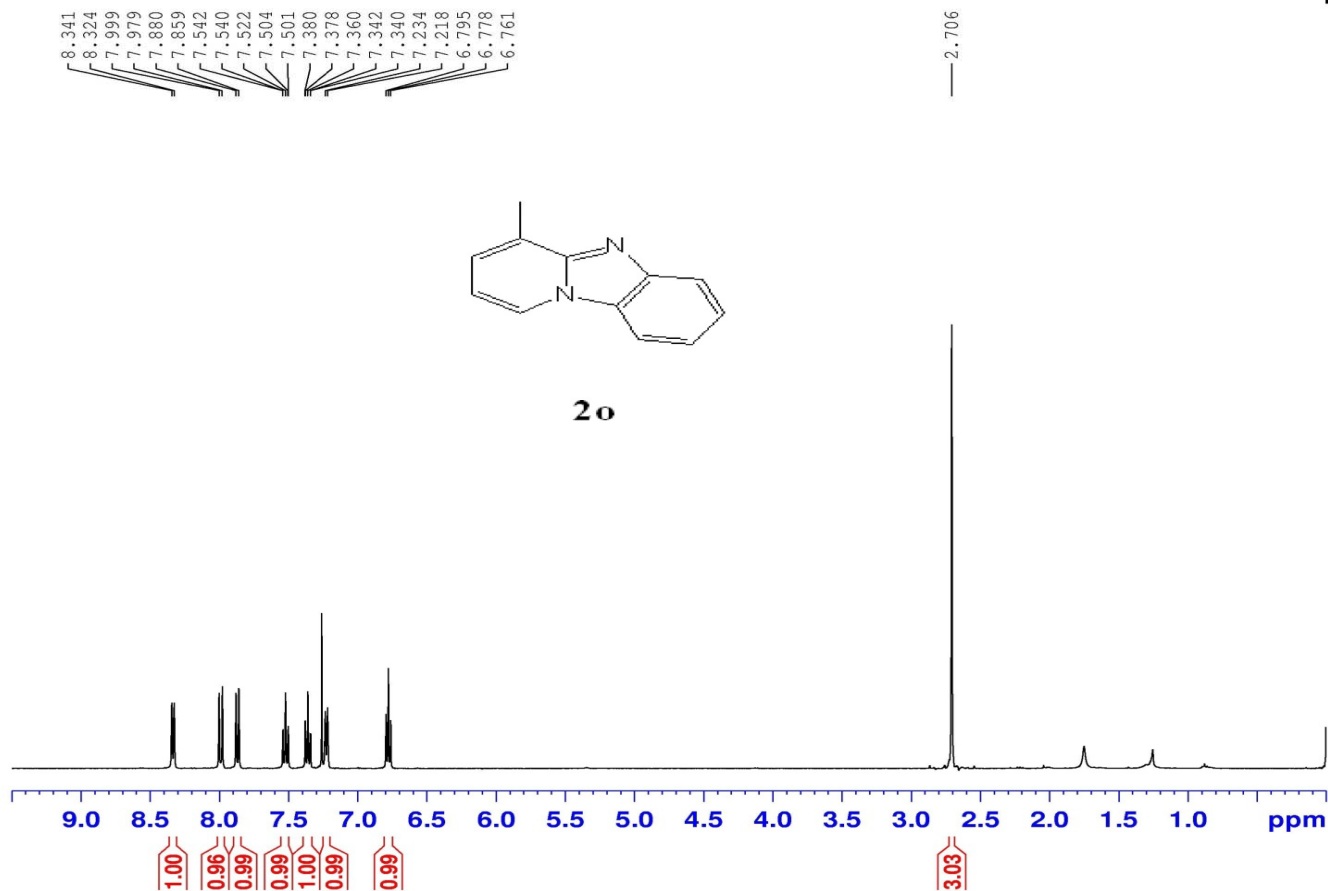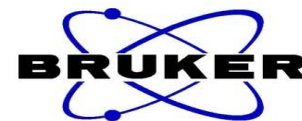

```
NAME          H PU
EXPNO         57
PROCNO        1
Date_         20111204
Time          13.44
INSTRUM       spect
PROBHD        5 mm PABBO BB-
PULPROG       zg30
TD            65536
SOLVENT       CDCl3
NS            16
DS            2
SWH           8278.146 Hz
FIDRES        0.126314 Hz
AQ            3.9584243 sec
RG            322.5
DW            60.400 usec
DE            6.50 usec
TE            297.0 K
D1            1.0000000 sec
TDO           1
```

```
===== CHANNEL f1 =====
NUC1          1H
P1            14.50 usec
PL1           0.00 dB
PL1W          10.87646866 W
SFO1          400.1324710 MHz
SI            32768
SF            400.1300092 MHz
WDW           EM
SSB           0
LB            0.30 Hz
GB            0
PC            1.00
```

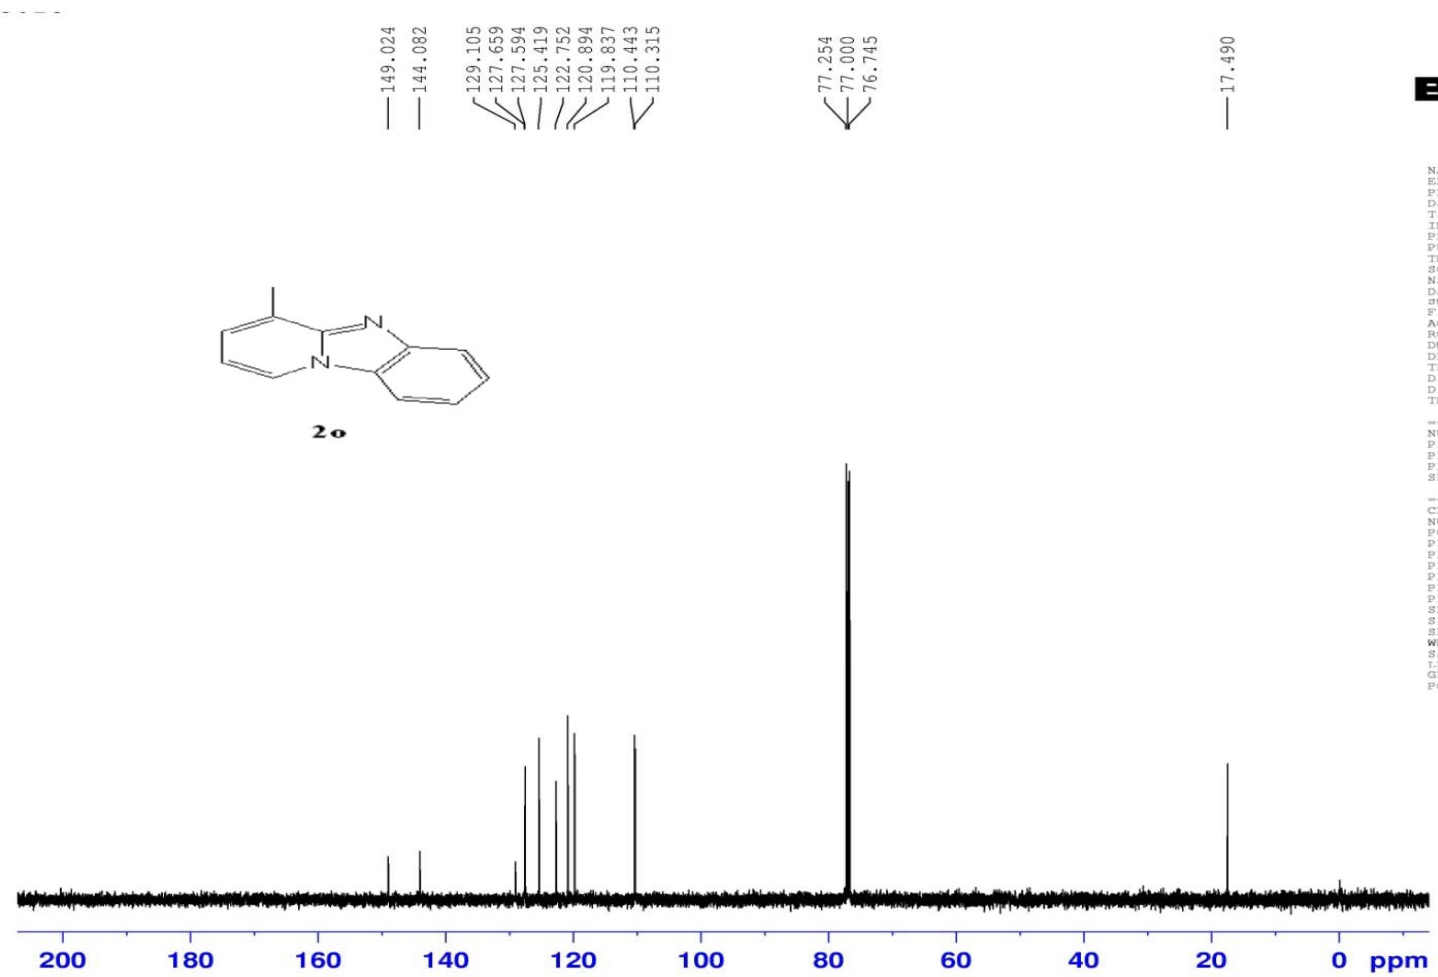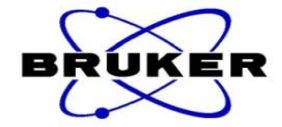

```
NAME 5018
EXPNO 1
PROCNO 1
DATE_ 20120530
Time 13.14
INSTRUM Spect
PROBHD 5 mm PABBO BB-
PULPROG zgpg30
TD 65536
SOLVENT cdcl3
NS 64
DS 4
SWH 29761.904 Hz
FIDRES 0.454131 Hz
AQ 1.1010548 sec
RG 203
DW 16.800 usec
DE 6.50 usec
TE 297.6 K
D1 2.00000000 sec
D11 0.03000000 sec
TD0 1

----- CHANNEL f1 -----
NUC1 13C
P1 11.57 usec
PL1 0.00 dB
PL1W 83.39463043 W
SFO1 125.7703643 MHz

----- CHANNEL f2 -----
CPDPRG2 waltz16
NUC2 1H
PCPD2 80.00 usec
PL2 2.50 dB
PL12 17.40 dB
PL13 17.40 dB
PL2W 13.02339581 W
PL12W 0.42143536 W
PL13W 0.42143536 W
SFO2 500.1320005 MHz
SI 32768
SF 125.7577991 MHz
WDW EM
SSB 0
LB 1.00 Hz
GB 0
PC 1.40
```

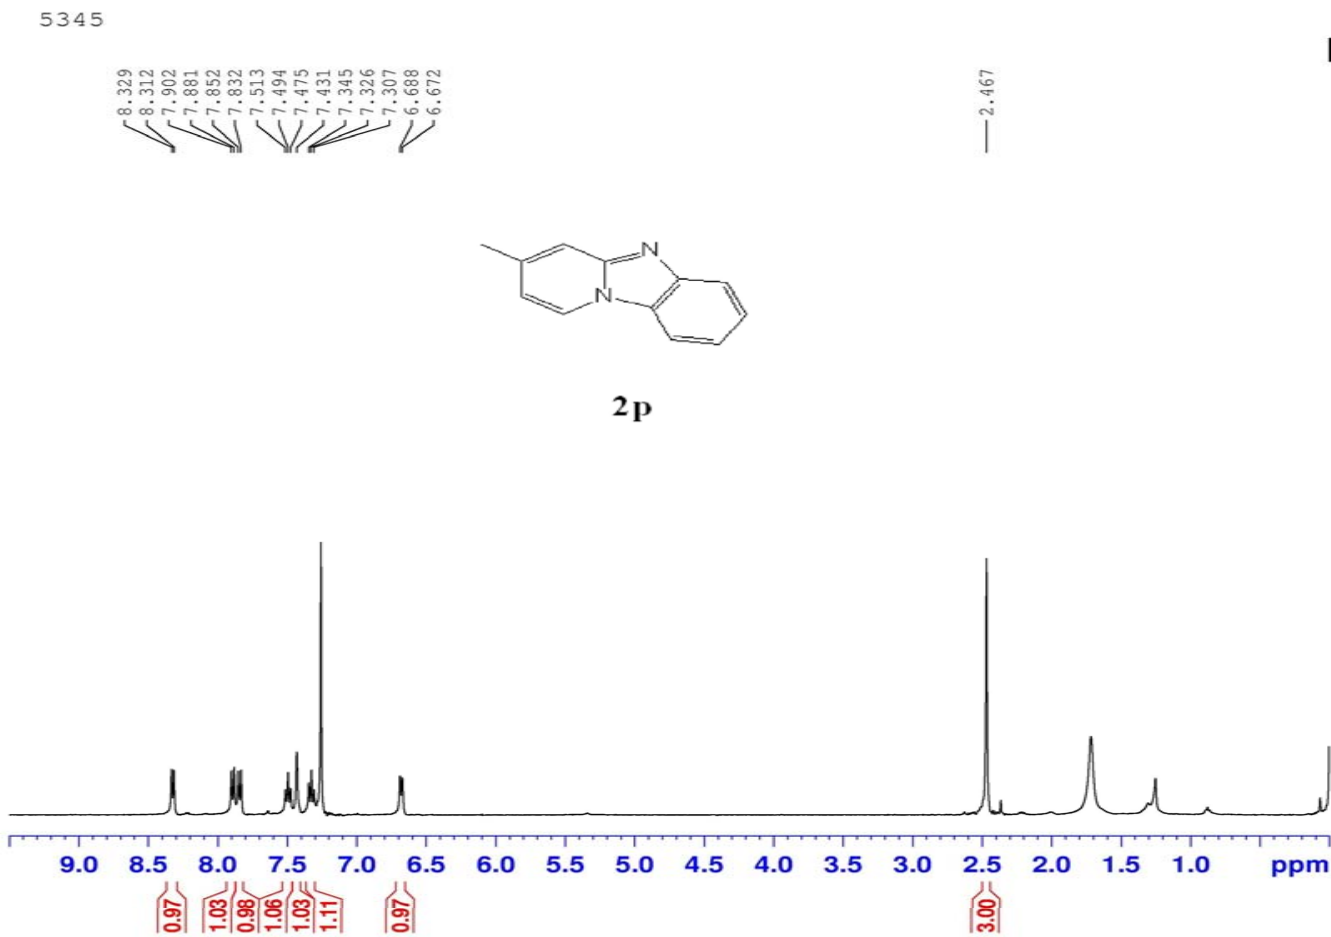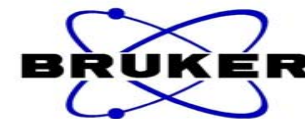

```
NAME          New Folder
EXPNO         42
PROCNO        1
Date_         20120530
Time          10.48
INSTRUM       spect
PROBHD        5 mm PABBO BB-
PULPROG       zg30
TD            65536
SOLVENT       CDC13
NS            16
DS            2
SWH           8278.146 Hz
FIDRES        0.126314 Hz
AQ            3.9584243 sec
RG            362
DW            60.400 usec
DE            6.50 usec
TE            673.2 K
D1            1.0000000 sec
TD0           1

----- CHANNEL f1 -----
NUC1          1H
P1            14.50 usec
PL1           0.00 dB
PL1W          10.07646066 W
SFO1          400.1324710 MHz
SI            32768
SF            400.1300102 MHz
WDW           EM
SSB           0
LB            0.30 Hz
GB            0
PC            1.00
```

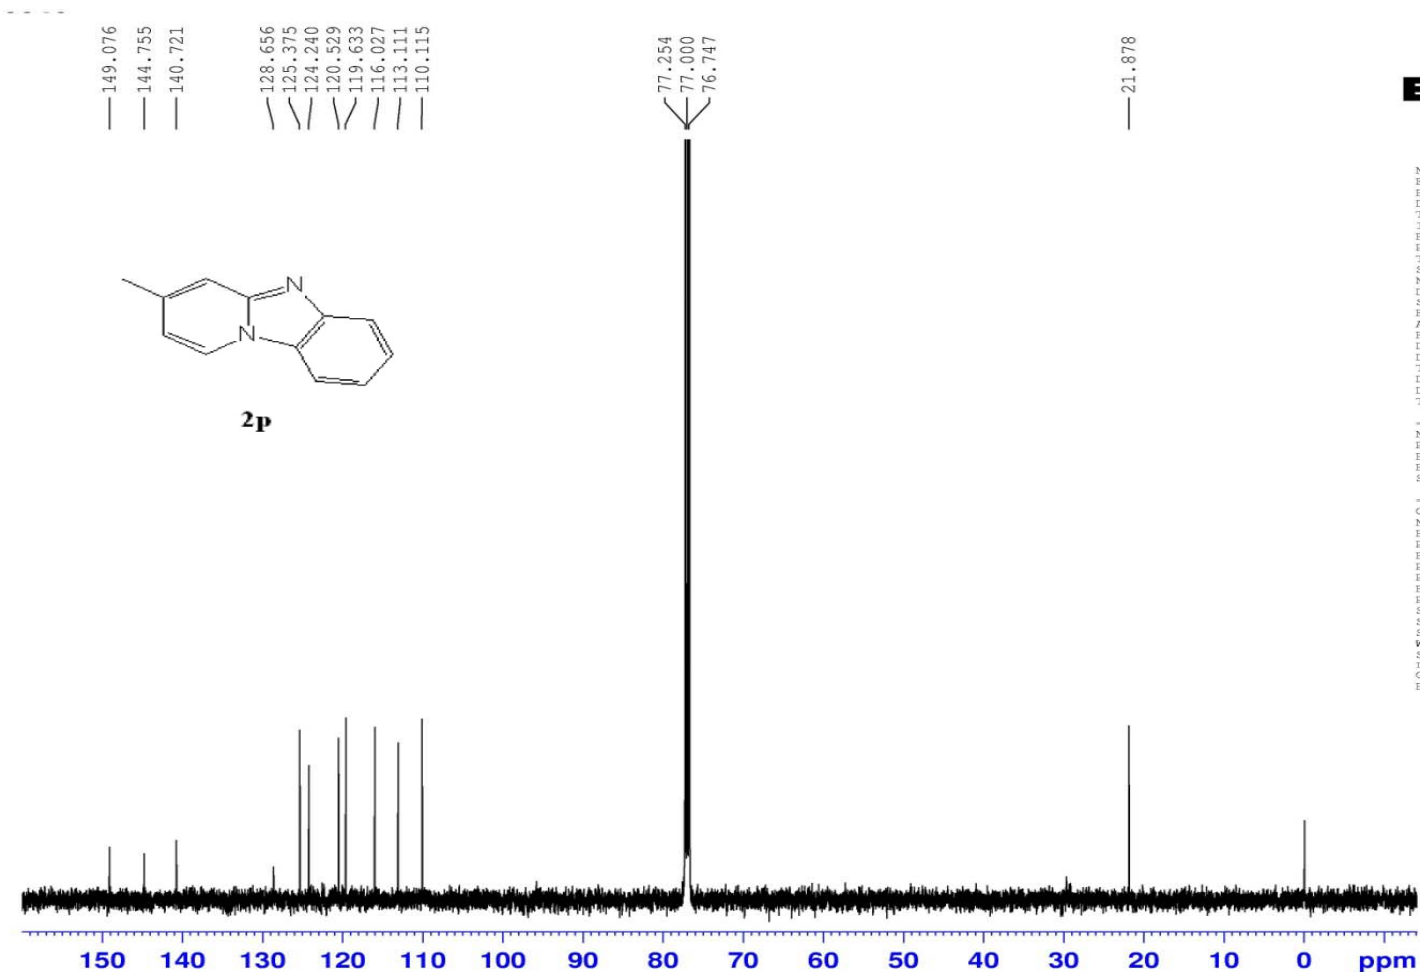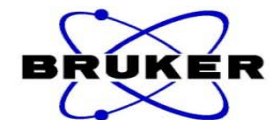

```
NAME 5345
EXPNO 1
PROCNO 1
Date_ 20120531
Time 16.23
INSTRUM Spect
PROBHD 5 mm PABBO BB-
PULPROG zgpg30
TD 65536
SOLVENT CDCl3
NS 1024
DS 4
SWH 29761.904 Hz
FIDRES 0.454131 Hz
AQ 1.1010548 sec
RG 203
DW 16.800 usec
DE 6.50 usec
TE 297.3 K
D1 2.0000000 sec
D11 0.0300000 sec
TD0 1

----- CHANNEL f1 -----
NUC1 13C
P1 11.57 usec
PL1 0.00 dB
PL1W 83.39463043 W
SFO1 125.7703643 MHz

----- CHANNEL f2 -----
CPDPRG2 waltz16
NUC2 1H
PCPD2 80.00 usec
PL2 2.50 dB
PL12 17.40 dB
PL13 17.40 dB
PL2W 13.02339581 W
PL12W 0.42143536 W
PL13W 0.42143536 W
SFO2 500.1320005 MHz
SI 32768
SF 125.7577932 MHz
WDW EM
SSB 0
LB 1.00 Hz
GB 0
PC 1.40
```



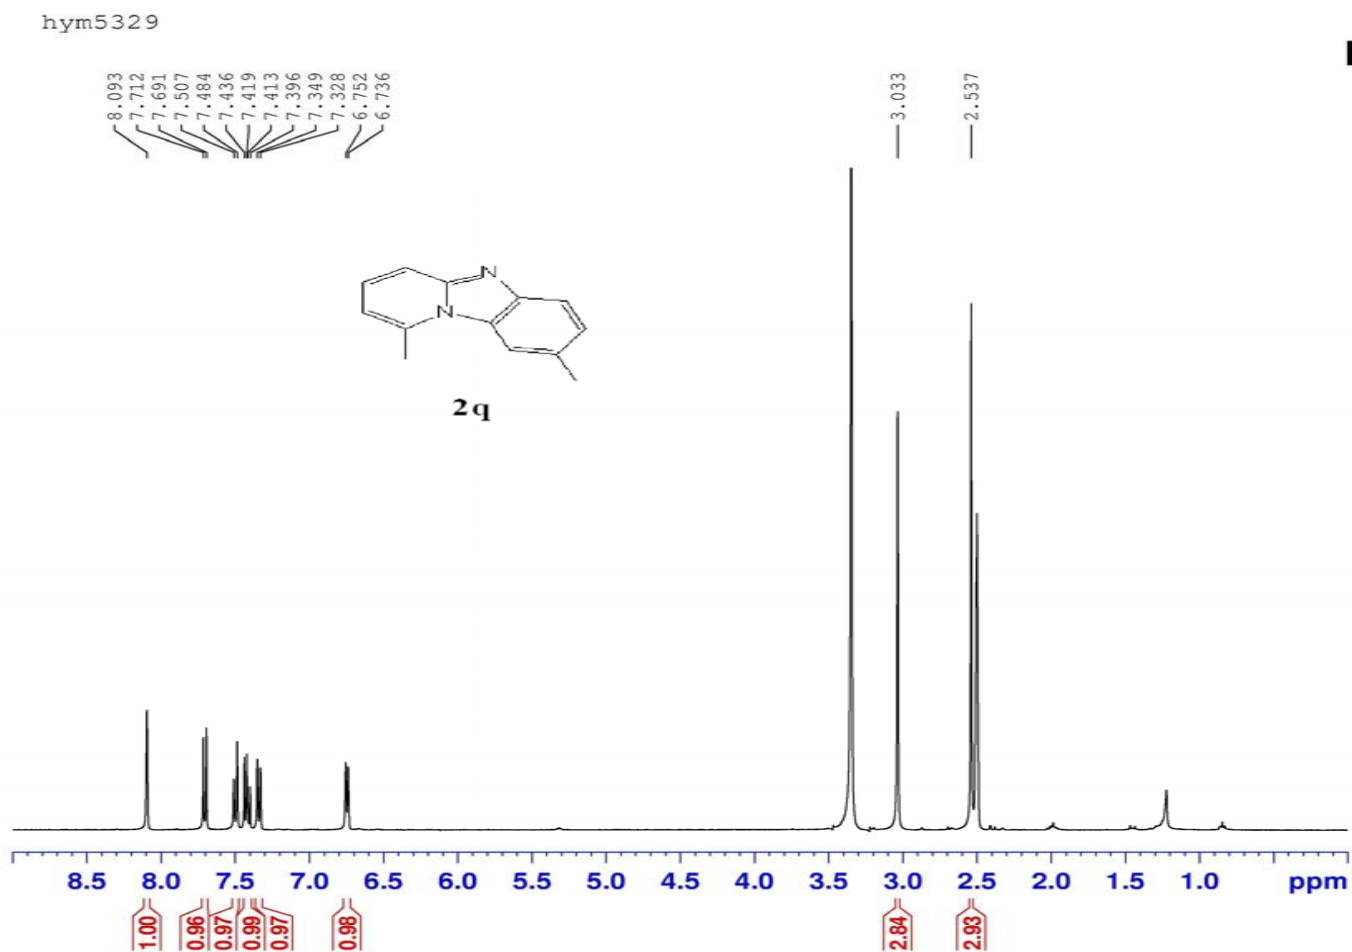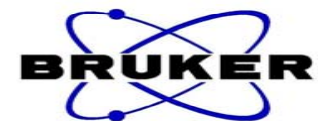

```
NAME          H PU
EXPNO         55
PROCNO        1
Date_         20111204
Time          9.19
INSTRUM       spect
PROBHD        5 mm PABBO BB-
PULPROG       zg30
TD            65536
SOLVENT       DMSO
NS            16
DS            2
SWH           8278.146 Hz
FIDRES        0.126314 Hz
AQ            3.9584243 sec
RG            256
DW            60.400 usec
DE            6.50 usec
TE            297.0 K
D1            1.0000000 sec
TDO           1
----- CHANNEL f1 -----
NUC1          1H
P1            14.50 usec
PL1           0.00 dB
PL1W          10.87646866 W
SF01          400.1324710 MHz
SI            32768
SF            400.1300029 MHz
WDW           EM
SSB           0
LB            0.30 Hz
GB            0
PC            1.00
```

5329

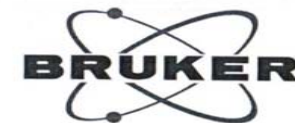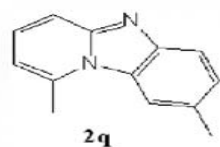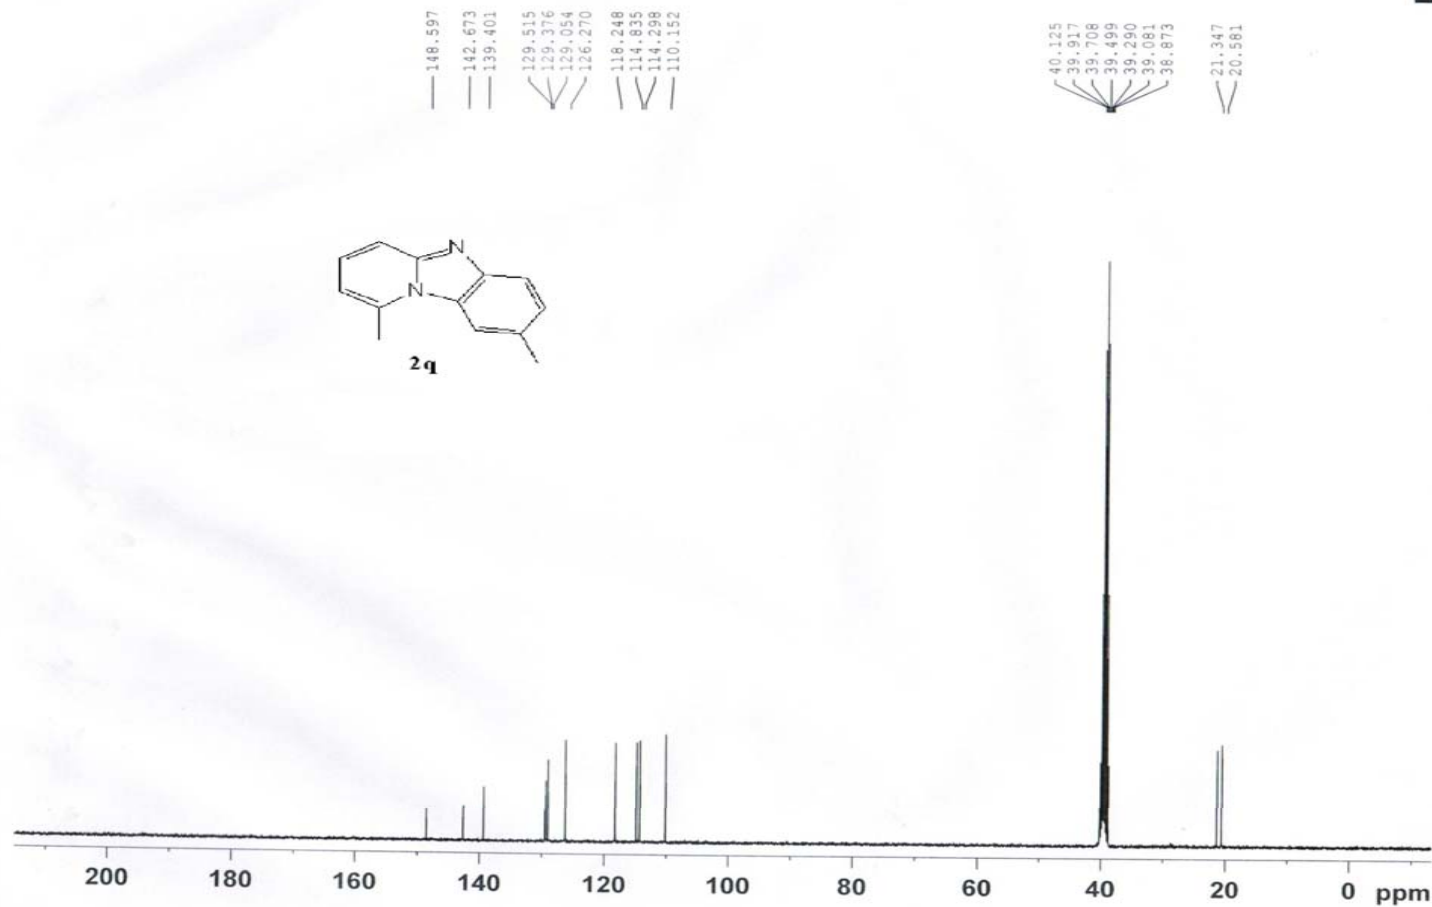

NAME May30-2012  
EXPNO 1  
PROCNO 58  
Date 20120530  
Time 22.24  
INSTRUM spect  
PROBHD 5 mm PABBO BB-  
PULPROG zgpg30  
TD 65536  
SOLVENT DMSO  
NS 1024  
DS 4  
SWH 23980.814 Hz  
FIDRES 0.365918 Hz  
AQ 1.3664756 sec  
RG 812.7  
CW 20.850 usec  
DE 6.50 usec  
TE 673.2 K  
DI 2.0000000 sec  
D11 0.0300000 sec  
TD0 1

----- CHANNEL f1 -----  
NUC1 13C  
P1 10.25 usec  
PL1 0.00 dB  
PL1W 38.68305206 W  
SFO1 100.6228296 MHz

----- CHANNEL f2 -----  
CPDPRG2 waltz16  
NUC2 1H  
PCPD2 80.00 usec  
PL2 0.00 dB  
PL12 14.54 dB  
PL13 0.00 dB  
PL2W 10.87646866 W  
PL12W 0.38237360 W  
PL13W 10.87646866 W  
SFO2 400.1316005 MHz  
SI 32768  
SF 100.6128350 MHz  
WDW EM  
SSB 0  
LB 1.00 Hz  
GB 0  
PC 1.40

2r

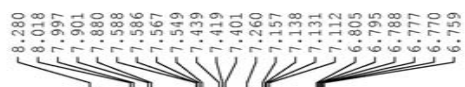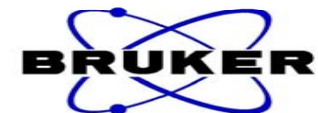

```
NAME Jun18-2013
EXPNO 9
PROCNO 1
Date_ 20130618
Time 10.08
INSTRUM spect
PROBHD 5 mm PABBO BB-
PULPROG zg30
TD 65536
SOLVENT CDCl3
NS 8
DS 2
SWH 8278.146 Hz
FIDRES 0.126314 Hz
AQ 3.9584243 sec
RG 362
DW 60.400 usec
DE 6.50 usec
TE 298.6 K
D1 1.0000000 sec
TDO 1
----- CHANNEL f1 -----
NUC1 1H
P1 12.58 usec
PL1 0.00 dB
PL1W 10.87646866 W
SF01 400.1324710 MHz
SI 32768
SF 400.1300088 MHz
WDW EM
SSB 0
LB 0.30 Hz
GB 0
PC 1.00
```

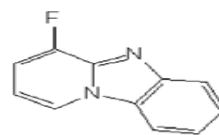

2r

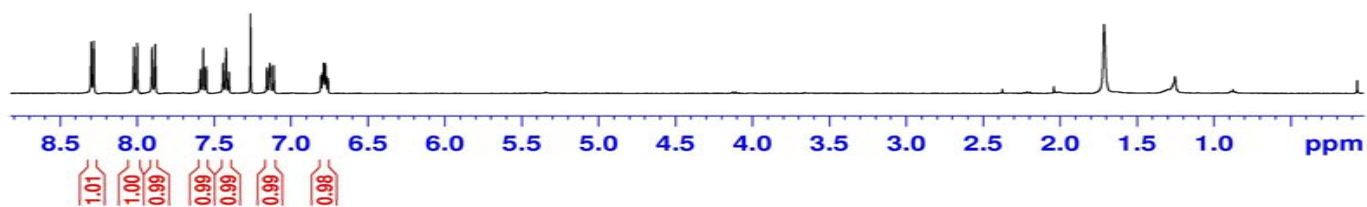

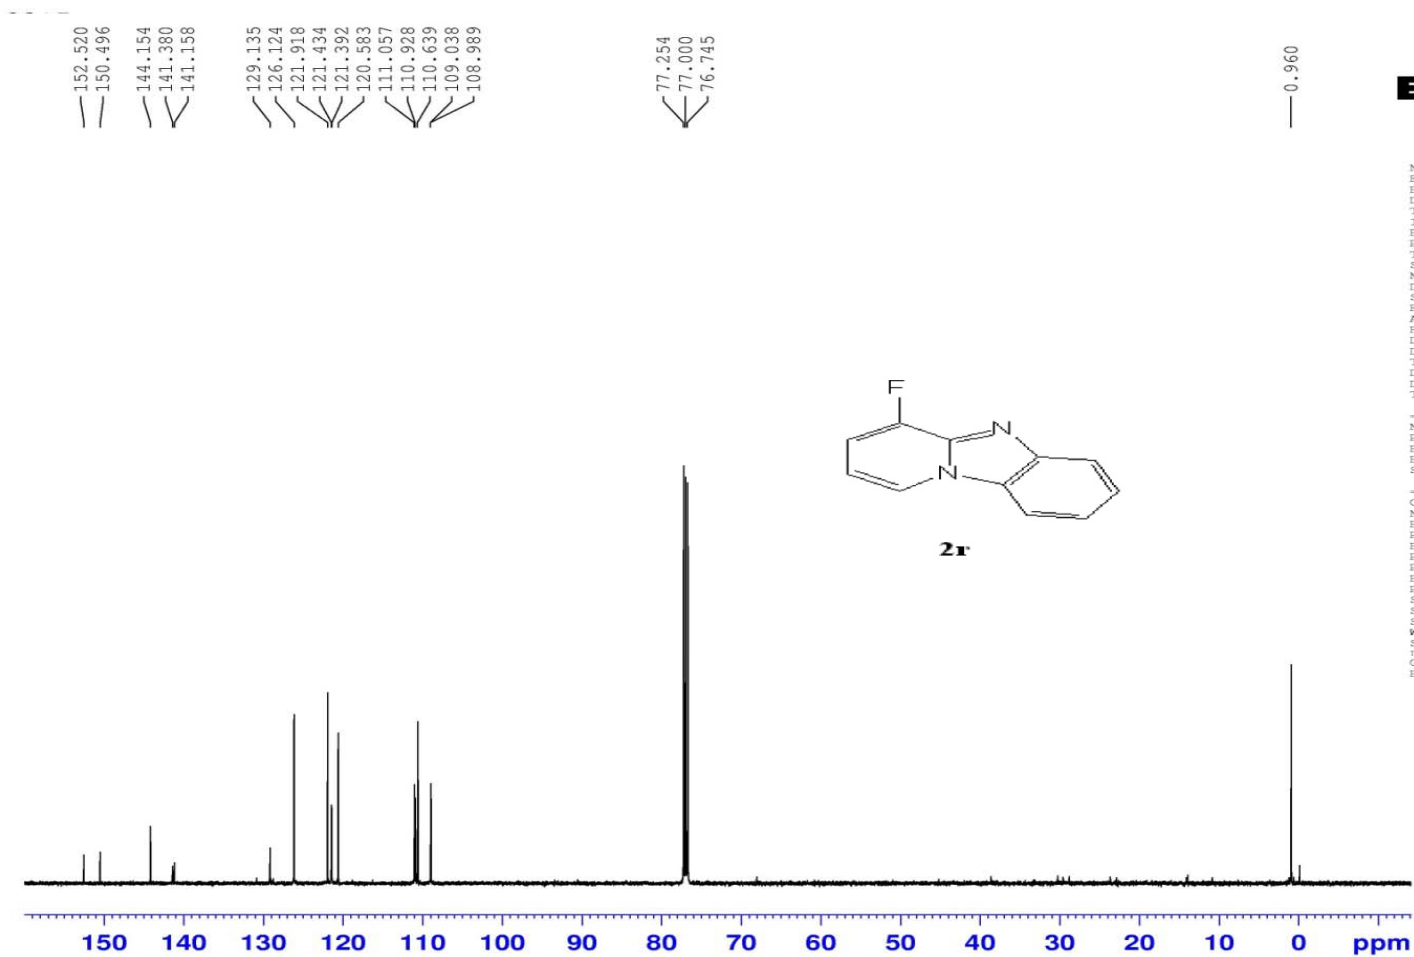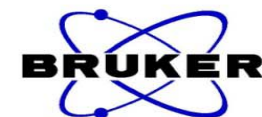

```
NAME 5371
EXPNO 1
PROCNO 1
DATE_ 20120604
Time 12.58
INSTRUM Spect
PROBHD 5 mm BABB0 BB-
PULPROG zgpg30
TD 65536
SOLVENT cnc13
NS 1024
DS 4
SWH 29761.904 Hz
FIDRES 0.454131 Hz
AQ 1.1010548 sec
RG 203
DW 16.800 usec
DE 6.50 usec
TE 297.0 K
D1 2.00000000 sec
D11 0.03000000 sec
D10 1

----- CHANNEL f1 -----
NUC1 13C
P1 11.57 usec
PL1 0.00 dB
PL1W 83.39463043 W
SFO1 125.7703643 MHz

----- CHANNEL f2 -----
CPDPRG2 waltz16
NUC2 1H
PCPD2 80.00 usec
PL2 2.50 dB
PL12 17.40 dB
PL13 17.40 dB
PL2W 13.02339581 W
PL12W 0.42143536 W
PL13W 0.42143536 W
SFO2 500.1320005 MHz
SI 32768
SF 125.7577992 MHz
WDW EM
SSB 0
LR 1.00 Hz
GB 0
PC 1.40
```

hym5353

8.424  
8.407  
8.056  
8.035  
7.898  
7.877  
7.570  
7.551  
7.537  
7.519  
7.442  
7.423  
7.260  
6.833  
6.816  
6.798

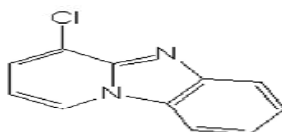

2s

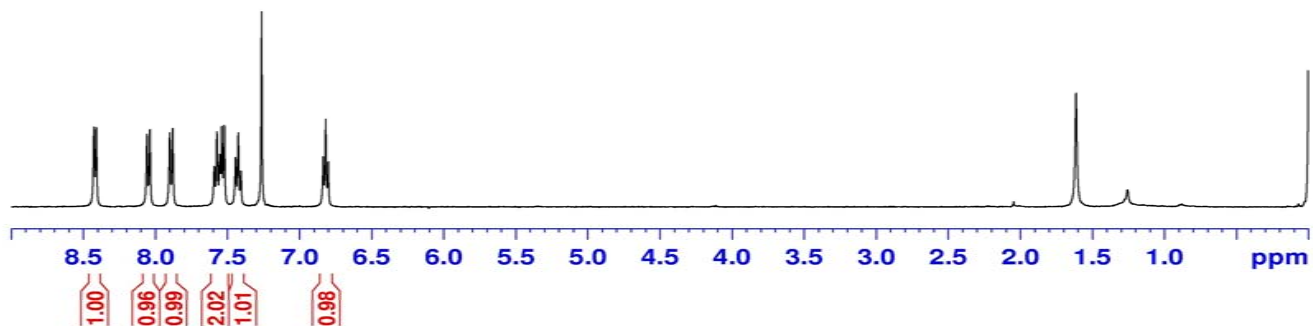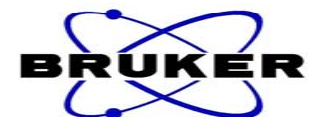

```
NAME          H PU
EXPNO         88
PROCNO        1
Date_         20111229
Time          15.35
INSTRUM       spect
PROBHD        5 mm PABBO BB-
PULPROG       zg30
TD            65536
SOLVENT       CDCl3
NS            16
DS            2
SWH           8278.146 Hz
FIDRES        0.126314 Hz
AQ            3.9584243 sec
RG            512
DW            60.400 usec
DE            6.50 usec
TE            296.8 K
D1            1.00000000 sec
TDO           1
```

```
----- CHANNEL f1 -----
NUC1          1H
P1            14.50 usec
PL1           0.00 dB
PL1W          10.87646866 W
SFO1          400.1324710 MHz
SI            32768
SF            400.1300091 MHz
WDW           EM
SSB           0
LB            0.30 Hz
GB            0
PC            1.00
```

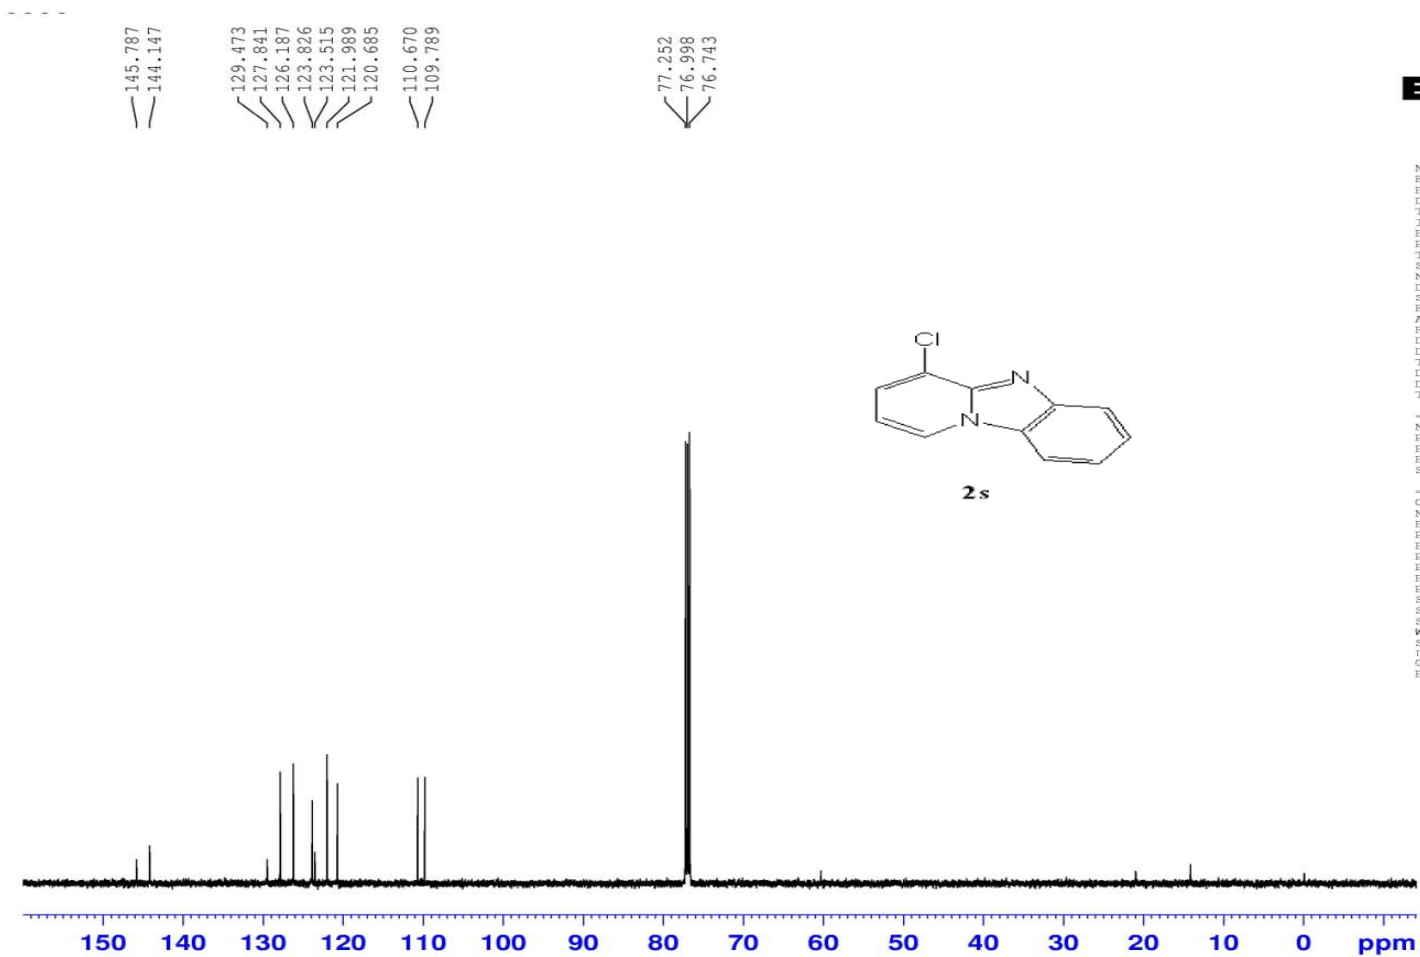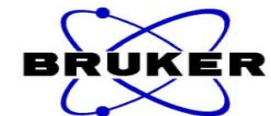

```
NAME          5353
EXPNO         1
PROCNO       1
Date_        20120531
Time         18.05
INSTRUM      Spect
PROBHD       5 mm PABBO BB-
PULPROG      zgpg30
TD           65536
SOLVENT      CDCl3
NS           298
DS           4
SWH          29761.904 Hz
FIDRES       0.454131 Hz
AQ           1.1010548 sec
RG           203
DW           16.800 usec
DE           6.50 usec
TE           298.0 K
D1           2.0000000 sec
D11          0.0300000 sec
TD0          1

----- CHANNEL f1 -----
NUC1         13C
P1           11.57 usec
PL1          0.00 dB
PL1W         83.39463043 W
SFO1         125.7703643 MHz

----- CHANNEL f2 -----
CPDPRG2     waltz16
NUC2         1H
PCPD2       80.00 usec
PL2          2.50 dB
PL12        17.40 dB
PL13        17.40 dB
PL2W        13.02339881 W
PL12W       0.42143536 W
PL13W       0.42143536 W
SFO2        500.1320005 MHz
SI          32768
SF          125.7577966 MHz
WDW         EM
SSB         0
LR          1.00 Hz
GB          0
PC          1.40
```

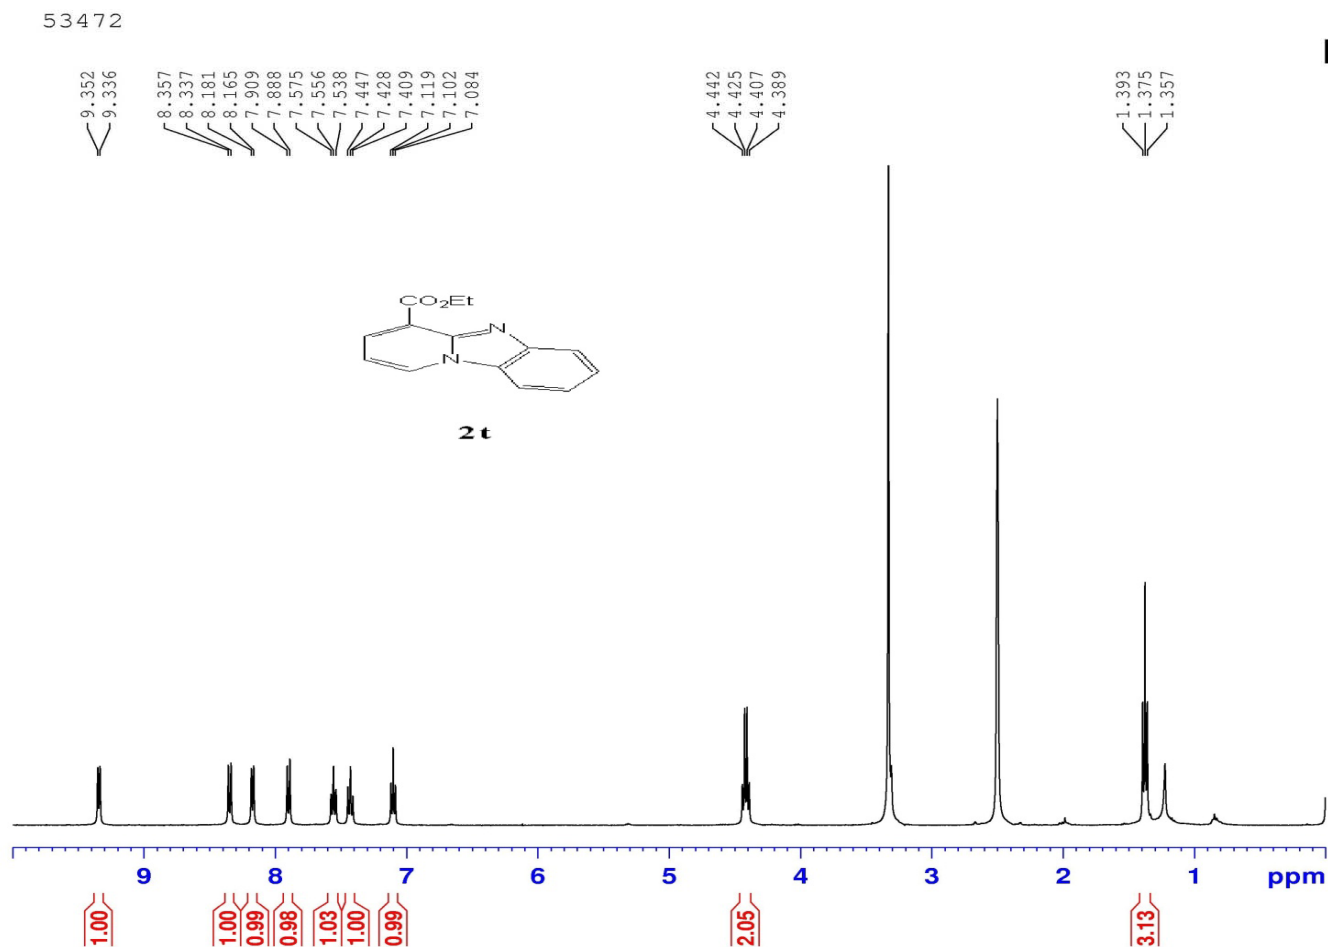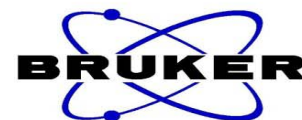

```
NAME          H 2I
EXPNO         60
PROCNO        1
Date_         20120217
Time          10.29
INSTRUM       spect
PROBHD        5 mm PABBO BB-
PULPROG       zg30
TD            65536
SOLVENT       DMSO
NS            16
DS            2
SWH           8278.146 Hz
FIDRES        0.126314 Hz
AQ            3.9584243 sec
RG            362
DW            60.400 usec
DE            6.50 usec
TE            296.9 K
D1            1.0000000 sec
TDO           1
```

```
===== CHANNEL f1 =====
NUC1          1H
P1            14.50 usec
PL1           0.00 dB
PL1W          10.87646866 W
SFO1          400.1324710 MHz
SI            32768
SF            400.1300028 MHz
WDW           EM
SSB           0
LB            0.30 Hz
GB            0
PC            1.00
```

5347

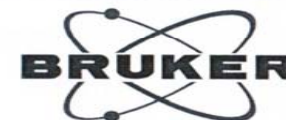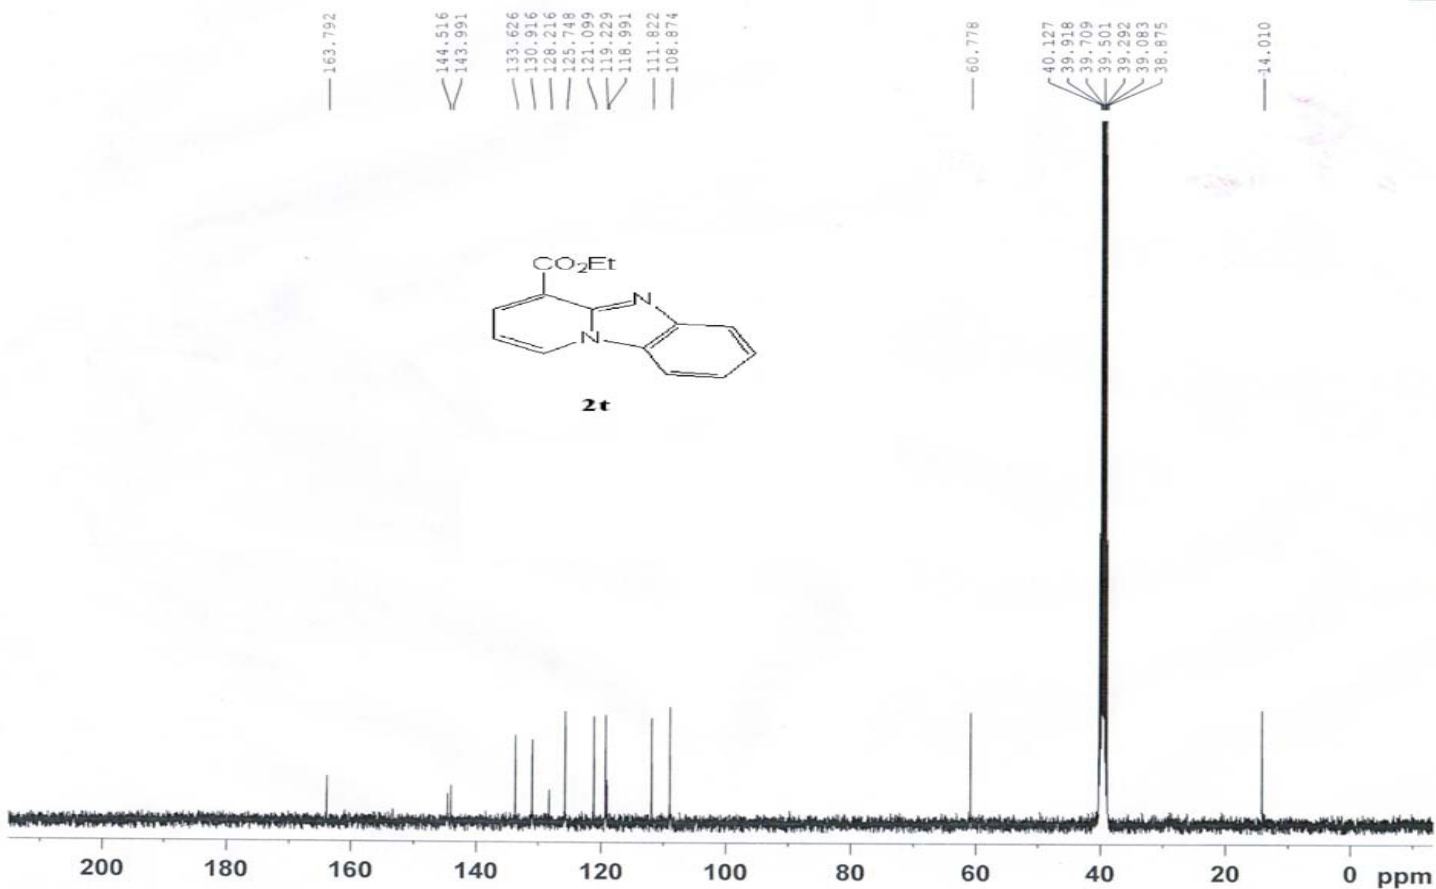

```
NAME          May30-2012
EXPNO         68
PROCNO        1
Date_         20120531
Time_         8.49
INSTRUM       spect
PROBHD        5 mm PABBO BB-
PULPROG       zgpg30
TD            65536
SOLVENT       DMSO
NS            759
DS            4
SWH           23980.814 Hz
FIDRES        0.365918 Hz
AQ            1.3664756 sec
RG            1024
DM            20.850 usec
DE            6.50 usec
TE            673.2 K
D1            2.0000000 sec
D11           0.0300000 sec
TD0           1

----- CHANNEL f1 -----
NUC1          13C
P1            10.25 usec
PL1           0.00 dB
PL1W          38.68305206 W
SFO1          100.6228298 MHz

----- CHANNEL f2 -----
CPDPRG2       waltz16
NUC2          1H
PCPD2         80.00 usec
PL2           0.00 dB
PL12          14.54 dB
PL13          0.00 dB
PL2W          10.87646866 W
PL12W         0.38237360 W
PL13W         10.87646866 W
SFO2          400.1316005 MHz
SI            32768
SF            100.6128363 MHz
WDW           EM
SSB           0
LB            1.00 Hz
GB            0
PC            1.40
```



hym5352

8.578  
8.560  
8.020  
8.018  
8.000  
7.959  
7.939  
7.623  
7.621  
7.603  
7.585  
7.582  
7.492  
7.490  
7.471  
7.453  
7.019  
7.015  
7.001  
6.997

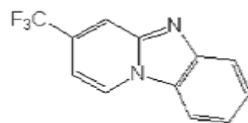

2u

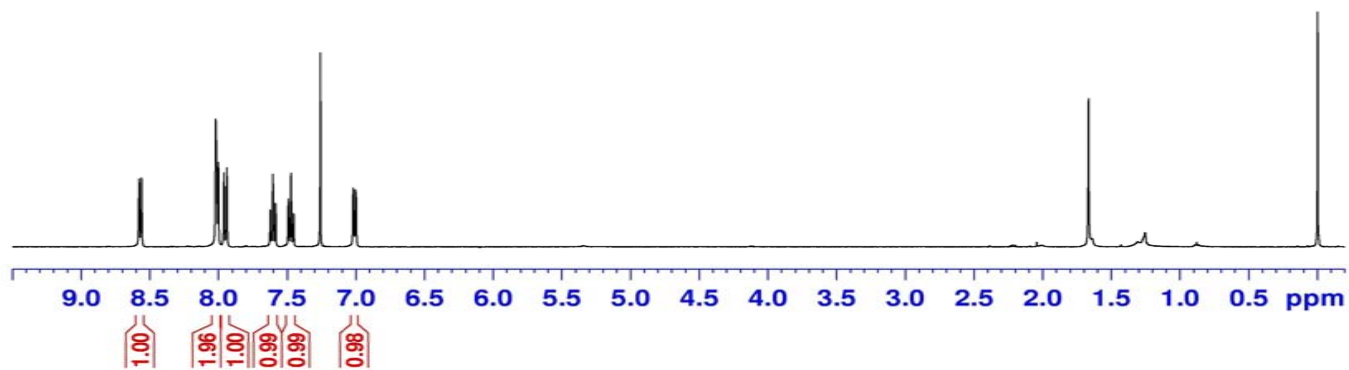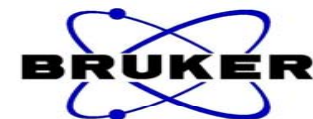

```
NAME          H PU
EXPNO         85
PROCNO        1
Date_         20111228
Time          12.28
INSTRUM       spect
PROBHD        5 mm PABBO BB-
PULPROG       zg30
TD            65536
SOLVENT       CDCl3
NS            16
DS            2
SWH           8278.146 Hz
FIDRES        0.126314 Hz
AQ            3.9584243 sec
RG            456.1
DW            60.400 usec
DE            6.50 usec
TE            297.6 K
D1            1.0000000 sec
TDO           1
```

```
----- CHANNEL f1 -----
NUC1          1H
P1            14.50 usec
PL1           0.00 dB
PL1W          10.87646866 W
SFO1          400.1324710 MHz
SI            32768
SF            400.1300101 MHz
WDW           EM
SSB           0
LB            0.30 Hz
GB            0
PC            1.00
```

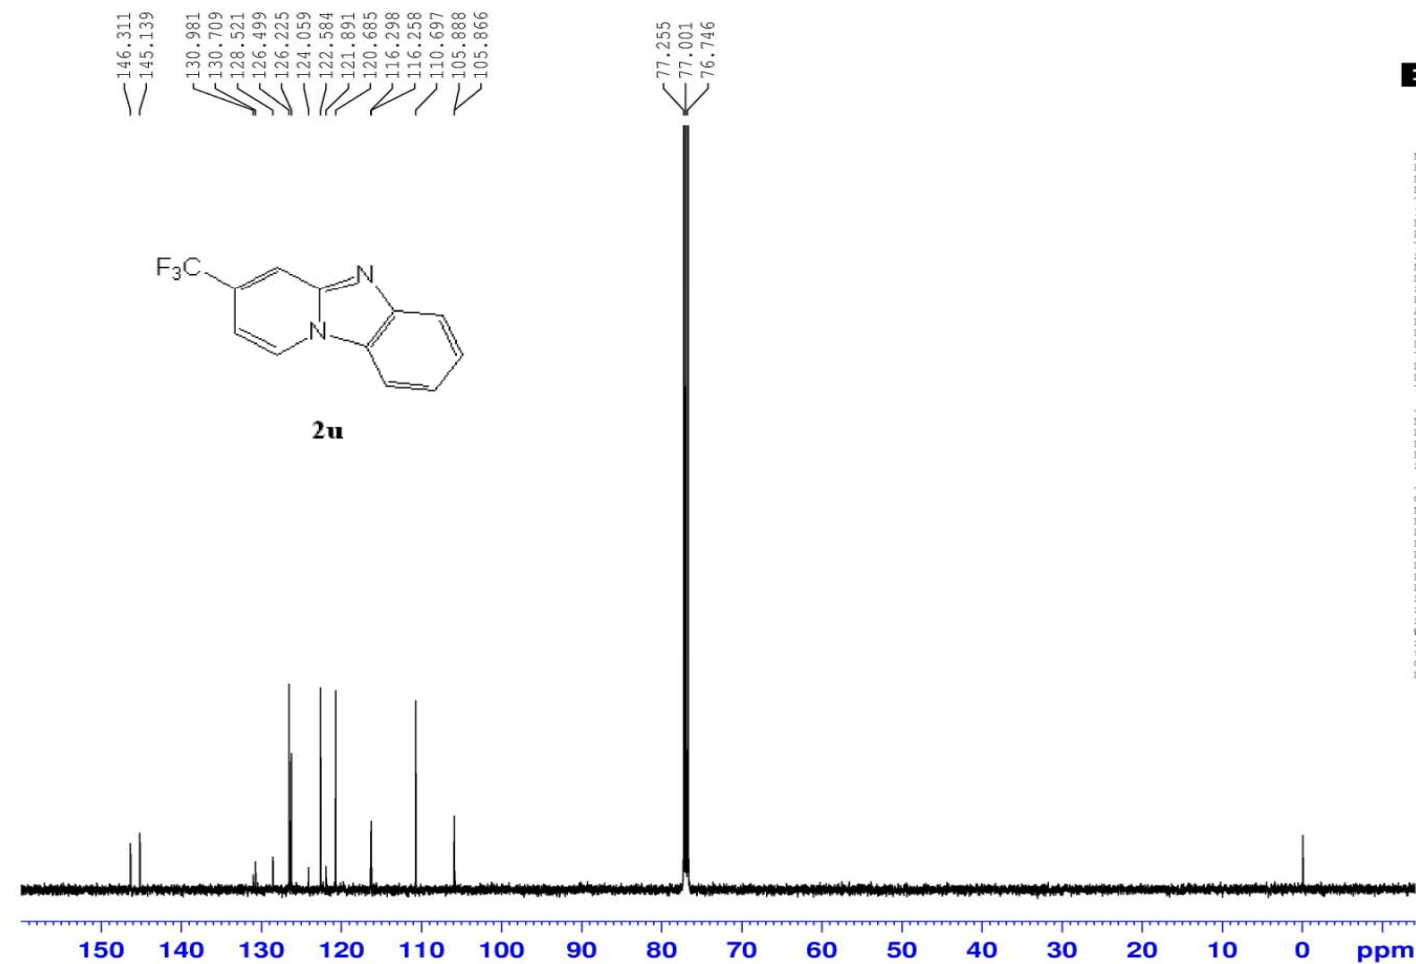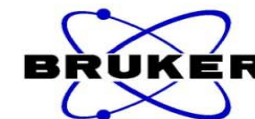

```
NAME          5352
EXPNO         1
PROCNO       1
Date_        20120531
Time         10.28
INSTRUM      Spect
PROBHD       5 mm PABBO BB-
PULPROG      zgpg30
TD           65536
SOLVENT      cdcl3
NS           801
DS           4
SWH          29761.904 Hz
FIDRES       0.454131 Hz
AQ           1.1010548 sec
RG           203
AW          16.800 usec
DE           6.50 usec
TE           297.4 K
D1           2.0000000 sec
D11          0.0300000 sec
TD0          1
```

```
----- CHANNEL f1 -----
NUC1          13C
P1            11.57 usec
PL1           0.00 dB
PL1W          83.39463043 W
SFO1          125.7703643 MHz
```

```
----- CHANNEL F2 -----
CPDPRG2      waltz16
NUC2          1H
PCPD2        80.00 usec
PL2           2.50 dB
PL12         17.40 dB
PL13         17.40 dB
PL2W         13.02359581 W
PL12W        0.42143536 W
PL13W        0.42143536 W
SFO2         500.1320003 MHz
SI           32768
SF           125.7577935 MHz
WDW          EM
SSB          0
RB           1.00 Hz
GB           0
PC           1.40
```

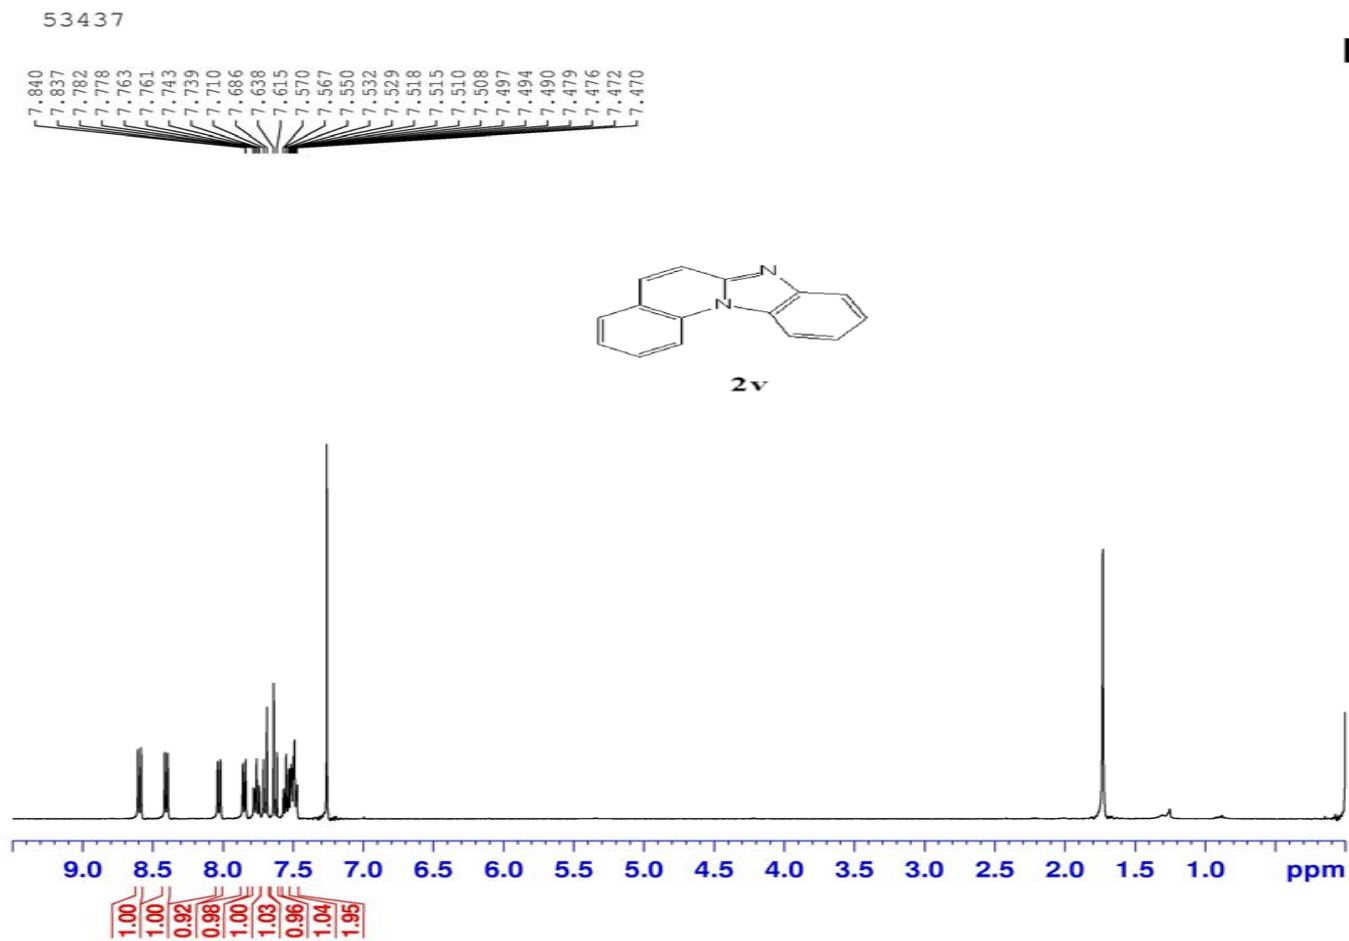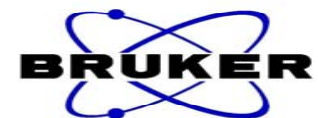

```
NAME          New Folder
EXPNO         20
PROCNO        1
Date_         20120223
Time          4.18
INSTRUM       spect
PROBHD        5 mm PABBO BB-
PULPROG       zg30
TD            65536
SOLVENT       CDCl3
NS            16
DS            2
SWH           8278.146 Hz
FIDRES        0.126314 Hz
AQ            3.9584243 sec
RG            362
DW            60.400 usec
DE            6.50 usec
TE            297.9 K
D1            1.0000000 sec
TD0           1
```

```
----- CHANNEL f1 -----
NUC1          1H
P1            14.50 usec
PL1           0.00 dB
PL1W          10.87646866 W
SFO1          400.1324710 MHz
SI            32768
SF            400.1300094 MHz
WDW           EM
SSB           0
LB            0.30 Hz
GB            0
PC            1.00
```

5343

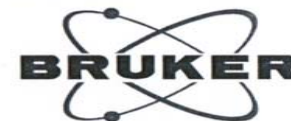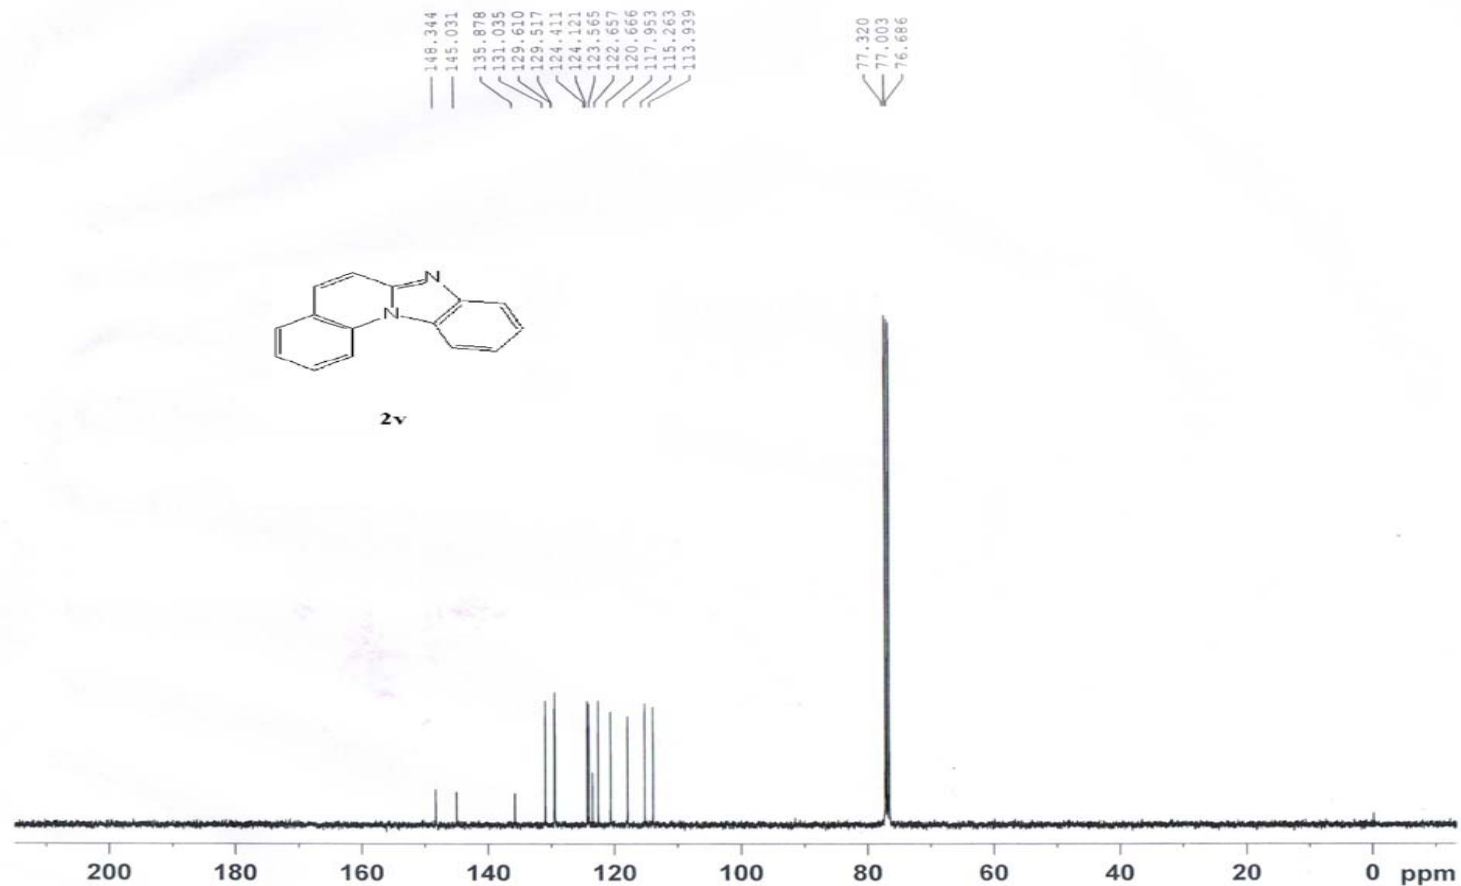

```
NAME May30-2012
EXPNO 65
PROCNO 1
Date_ 20120531
Time 5.53
INSTRUM spect
PROBHD 5 mm PABBO BB-
PULPROG zgpg30
TD 65536
SOLVENT CDCl3
NS 1024
DS 4
SWH 23980.814 Hz
FIDRES 0.365918 Hz
AQ 1.3664756 sec
RG 812.7
DW 20.850 usec
DE 6.50 usec
TE 673.2 K
D1 2.0000000 sec
D11 0.0300000 sec
TD0 1

----- CHANNEL f1 -----
NUC1 13C
P1 10.25 usec
PL1 0.00 dB
PL1W 38.68305206 W
SF01 100.6228298 MHz

----- CHANNEL f2 -----
CPDPRG2 waltz16
NUC2 1H
PCPD2 80.00 usec
PL2 0.00 dB
PL12 14.54 dB
PL13 0.00 dB
PL2W 10.87646866 W
PL12W 0.38237360 W
PL13W 10.87646866 W
SF02 400.1316005 MHz
SI 32768
SF 100.6127630 MHz
WDW EM
SSB 0
LB 1.00 Hz
GB 0
PC 1.40
```

hym5344

7.836  
7.768  
7.763  
7.756  
7.745  
7.696  
7.692  
7.686  
7.679  
7.674  
7.540  
7.538  
7.520  
7.502  
7.500  
7.439  
7.437  
7.418  
7.401  
7.399  
7.259  
7.090  
7.072

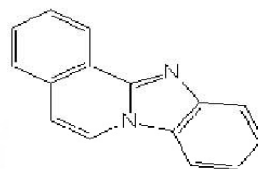

2w

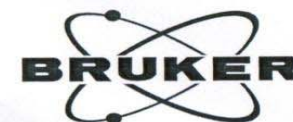

```
NAME          he_yimiao
EXPNO         78
PROCNO        1
Date_         20111218
Time          17.11
INSTRUM       spect
PROBHD        5 mm PABBO BB-
PULPROG       zg30
TD            65536
SOLVENT       CDCl3
NS            16
DS            2
SWH           8278.146 Hz
FIDRES        0.126314 Hz
AQ            3.9584243 sec
RG            322.5
DW            60.400 usec
DE            6.50 usec
TE            297.4 K
D1            1.00000000 sec
TDO           1
```

```
----- CHANNEL f1 -----
NUC1          1H
P1            14.50 usec
PL1           0.00 dB
PL1W          10.87646866 W
SFO1          400.1324710 MHz
SI            32768
SF            400.1300095 MHz
WDW           EM
SSB           0
LB            0.30 Hz
GB            0
PC            1.00
```

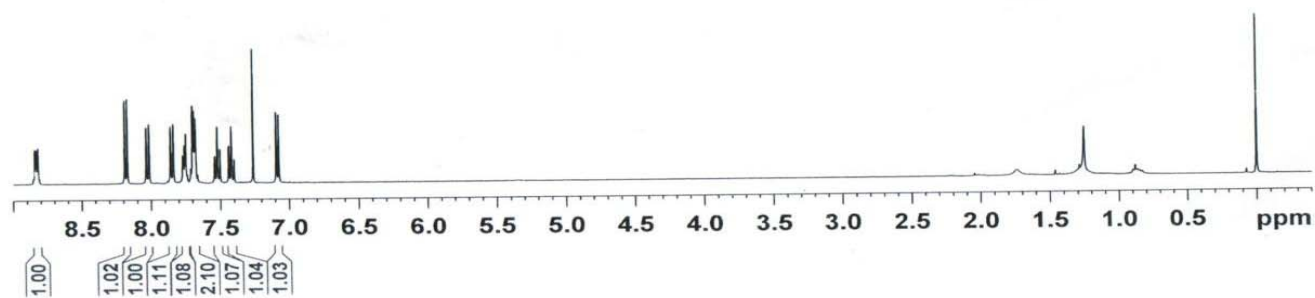

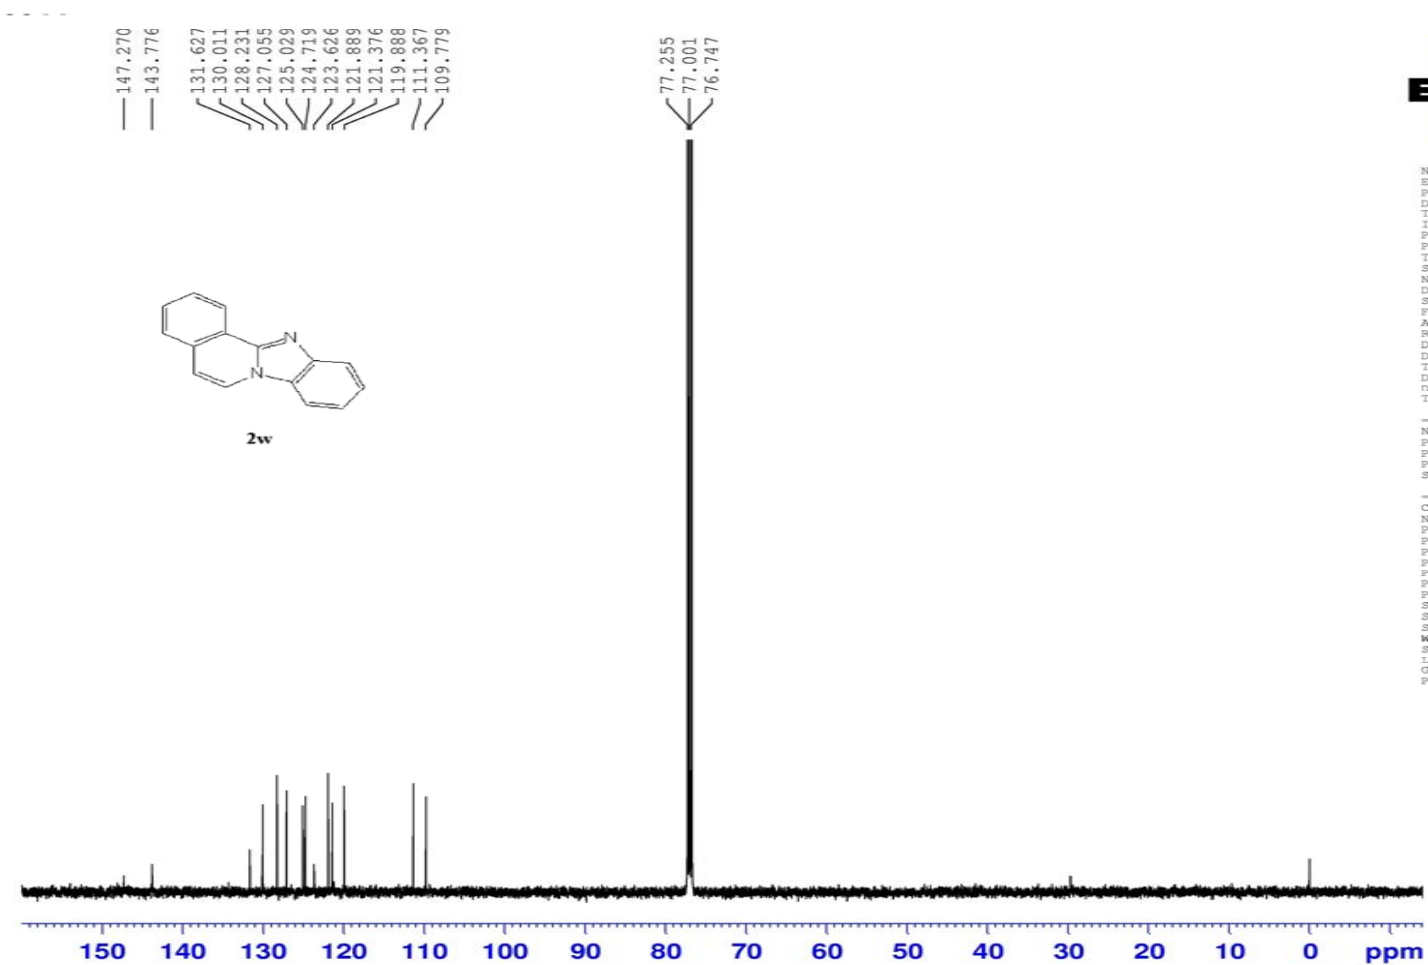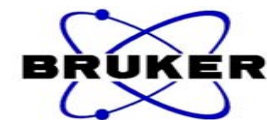

```
NAME          5344
EXPNO         1
PROCNO        1
Date_         20120531
Time          16.17
INSTRUM       Spect
PROBHD        5 mm PABBO BB-
PULPROG       zgpg30
TD            65536
SOLVENT       CDCl3
NS            593
DS            4
SWH           29761.904 Hz
FIDRES        0.454131 Hz
AQ            1.1010548 sec
RG            203
DW            16.800 usec
DE            6.50 usec
TE            297.1 K
D1            2.0000000 sec
D11           0.0300000 sec
TD0           1

----- CHANNEL f1 -----
NUC1          13C
P1            11.57 usec
PL1           0.00 dB
PL1W          83.39463043 W
SFO1          125.7703643 MHz

----- CHANNEL f2 -----
CPDPRG2       waltz16
NUC2          1H
PCPD2         80.00 usec
PL2           2.50 dB
PL12          17.40 dB
PL13          17.40 dB
PL2W          13.02339561 W
PL12W         0.42143536 W
PL13W         0.42143536 W
SFO2          500.1320005 MHz
SI            32768
SF            125.7577937 MHz
WDW           EM
SSB           0
LB            1.00 Hz
GB            0
PC            1.40
```

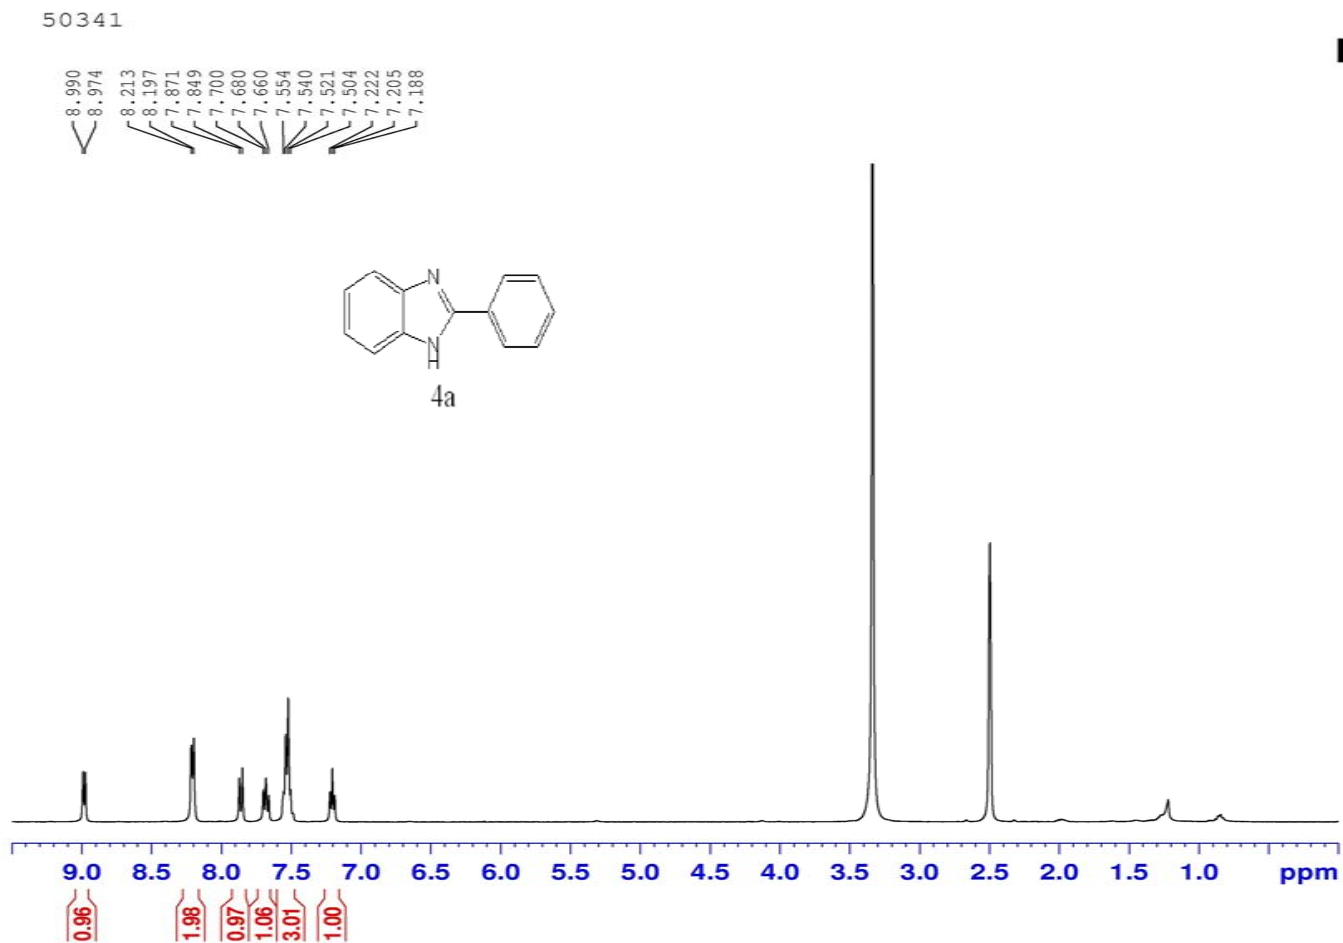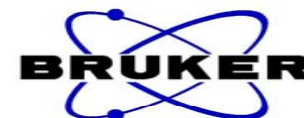

```
NAME          H 2I
EXPNO         40
PROCNO        1
Date_         20120529
Time          0.45
INSTRUM       spect
PROBHD        5 mm PABBO BB-
PULPROG       zg30
TD            65536
SOLVENT       DMSO
NS            16
DS            2
SWH           8278.146 Hz
FIDRES        0.126314 Hz
AQ            3.9584243 sec
RG            256
DW            60.400 usec
DE            6.50 usec
TE            673.2 K
D1            1.00000000 sec
TDO           1

----- CHANNEL f1 -----
NUC1          1H
P1            14.50 usec
PL1           0.00 dB
PL1W          10.87646866 W
SFO1          400.1324710 MHz
SI            32768
SF            400.1300041 MHz
WDW           EM
SSB           0
LB            0.30 Hz
GB            0
PC            1.00
```

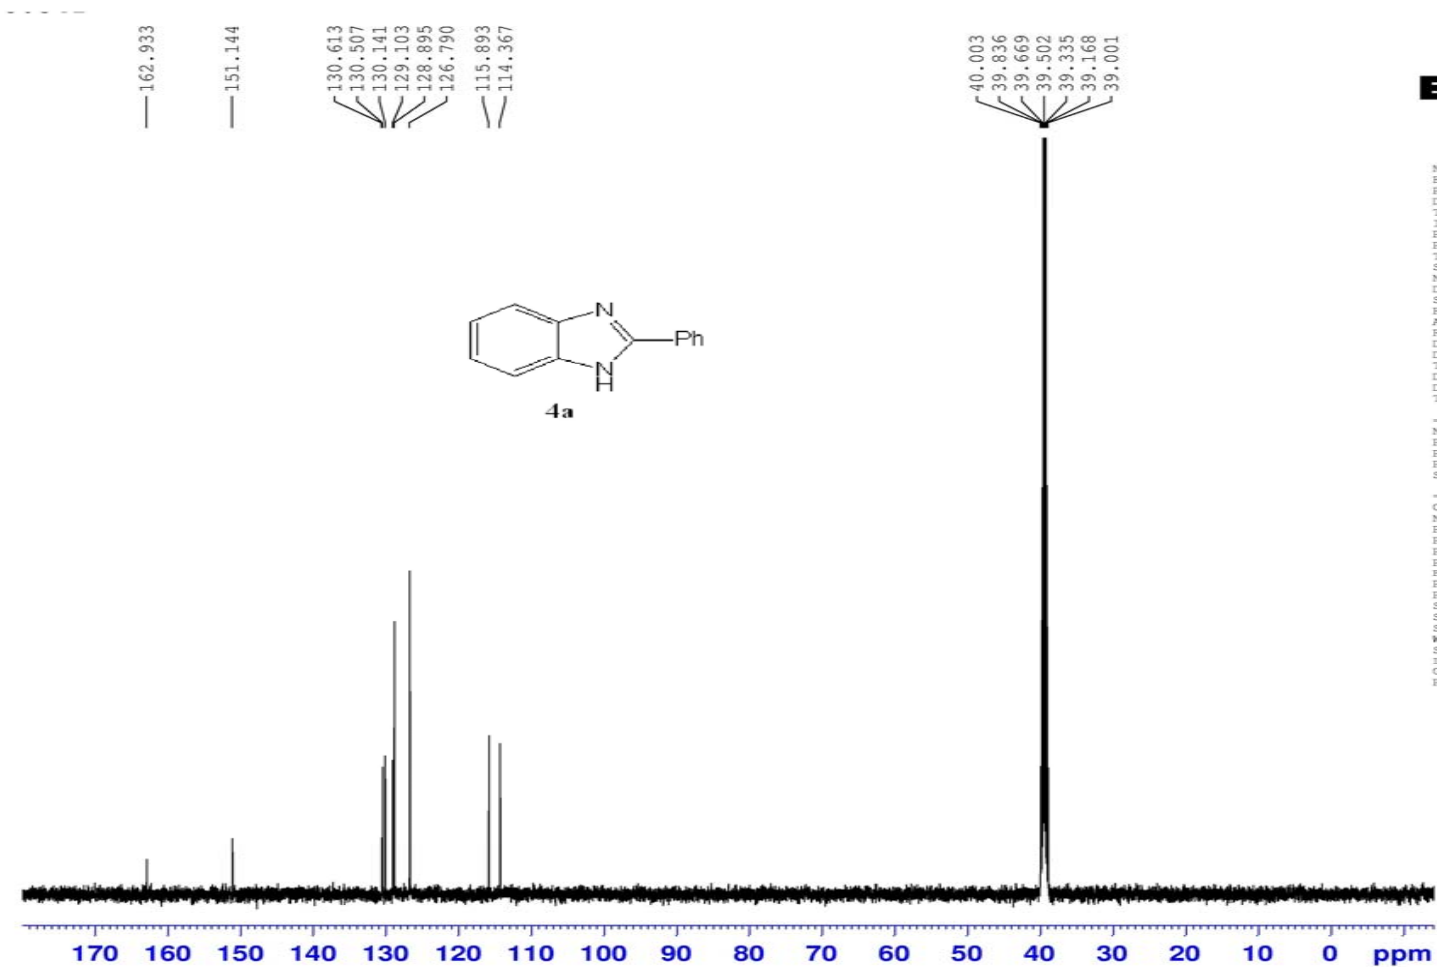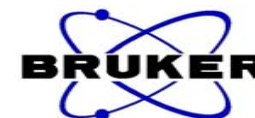

```
NAME          50341
EXPNO          1
PROCNO         1
Date_         20120530
Time          11.18
INSTRUM       Spect
PROBHD        5 mm PABBO BB-
PULPROG       zgpg30
TD            65536
SOLVENT       DMSO
NS            129
DS            4
SWH           29761.904 Hz
FIDRES        0.454131 Hz
AQ            1.1010548 sec
RG            203
DW            16.800 usec
DE            6.50 usec
TE            297.0 K
D1            2.0000000 sec
D11           0.0300000 sec
TD0           1

----- CHANNEL f1 -----
NUC1          13C
P1            11.57 usec
PL1           0.00 dB
PL1W          83.39463043 W
SFO1          125.7703643 MHz

----- CHANNEL f2 -----
CPDPRG2       waltz16
NUC2          1H
PCPD2         80.00 usec
PL2           2.50 dB
PL12          17.40 dB
PL13          17.40 dB
PL2W          13.02339081 W
PL12W         0.42143536 W
PL13W         0.42143536 W
SFO2          500.1320005 MHz
SI            32768
SF            125.7578486 MHz
WDW           EM
SSB           0
LB            1.00 Hz
GB            0
PC            1.40
```



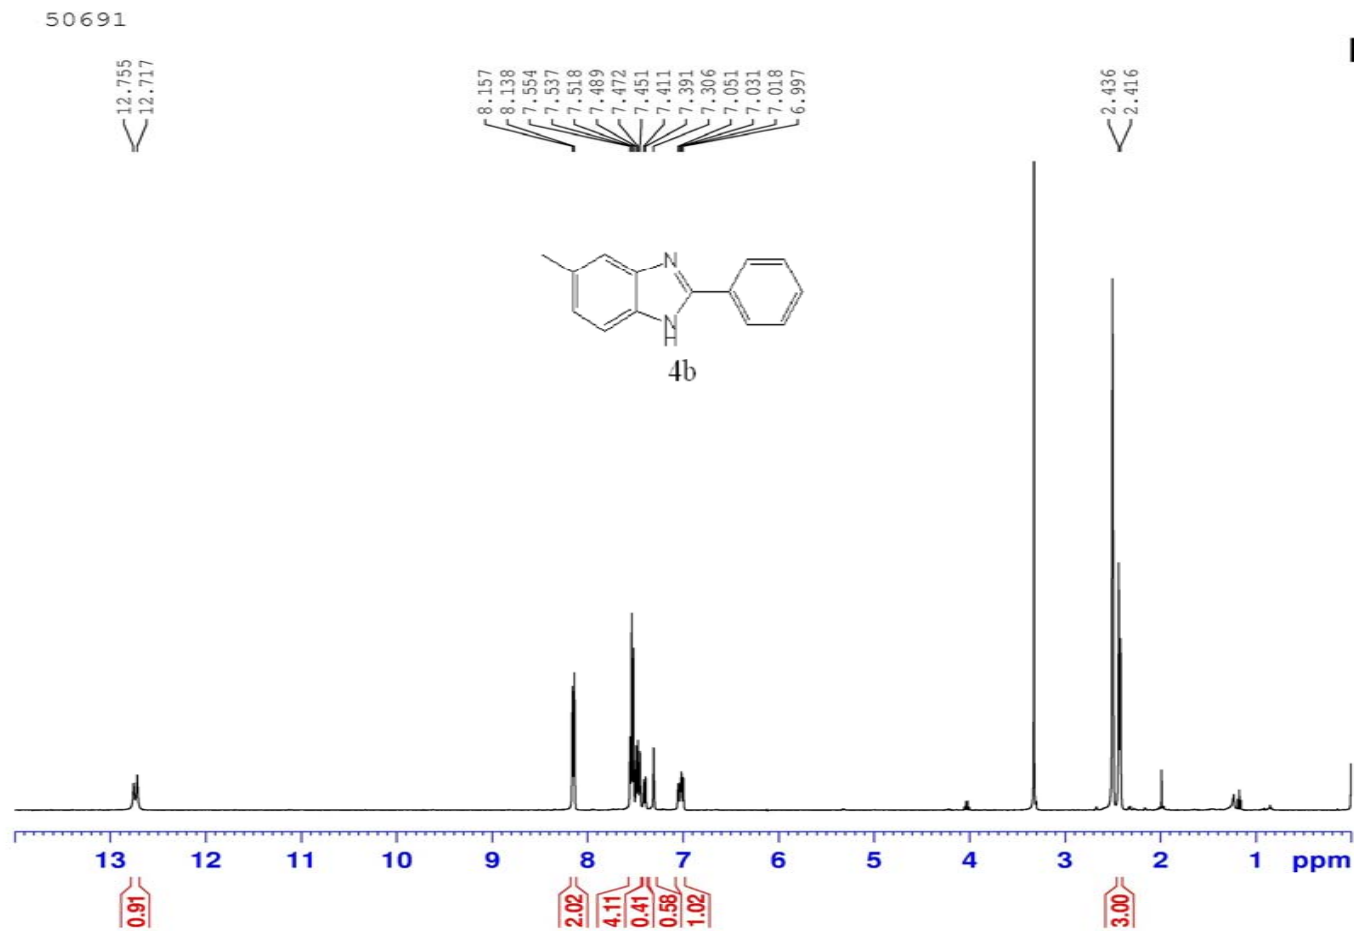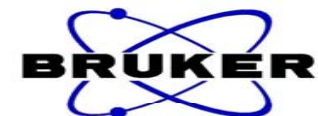

```
NAME          H  ZI
EXPNO         36
PROCNO        1
Date_         20120523
Time          9.24
INSTRUM       spect
PROBHD        5 mm PABBO BB-
PULPROG       zg30
TD            65536
SOLVENT       DMSO
NS            16
DS            2
SWH           8278.146 Hz
FIDRES        0.126314 Hz
AQ            3.9584243 sec
RG            362
DW            60.400 usec
DE            6.50 usec
TE            673.2 K
D1            1.0000000 sec
TD0           1

----- CHANNEL f1 -----
NUC1          1H
P1            14.50 usec
PL1           0.00 dB
PL1W         10.87646866 W
SFO1         400.1324710 MHz
SI           32768
SF           400.1300026 MHz
WDW           EM
SSB           0
LB            0.30 Hz
GB            0
PC            1.00
```

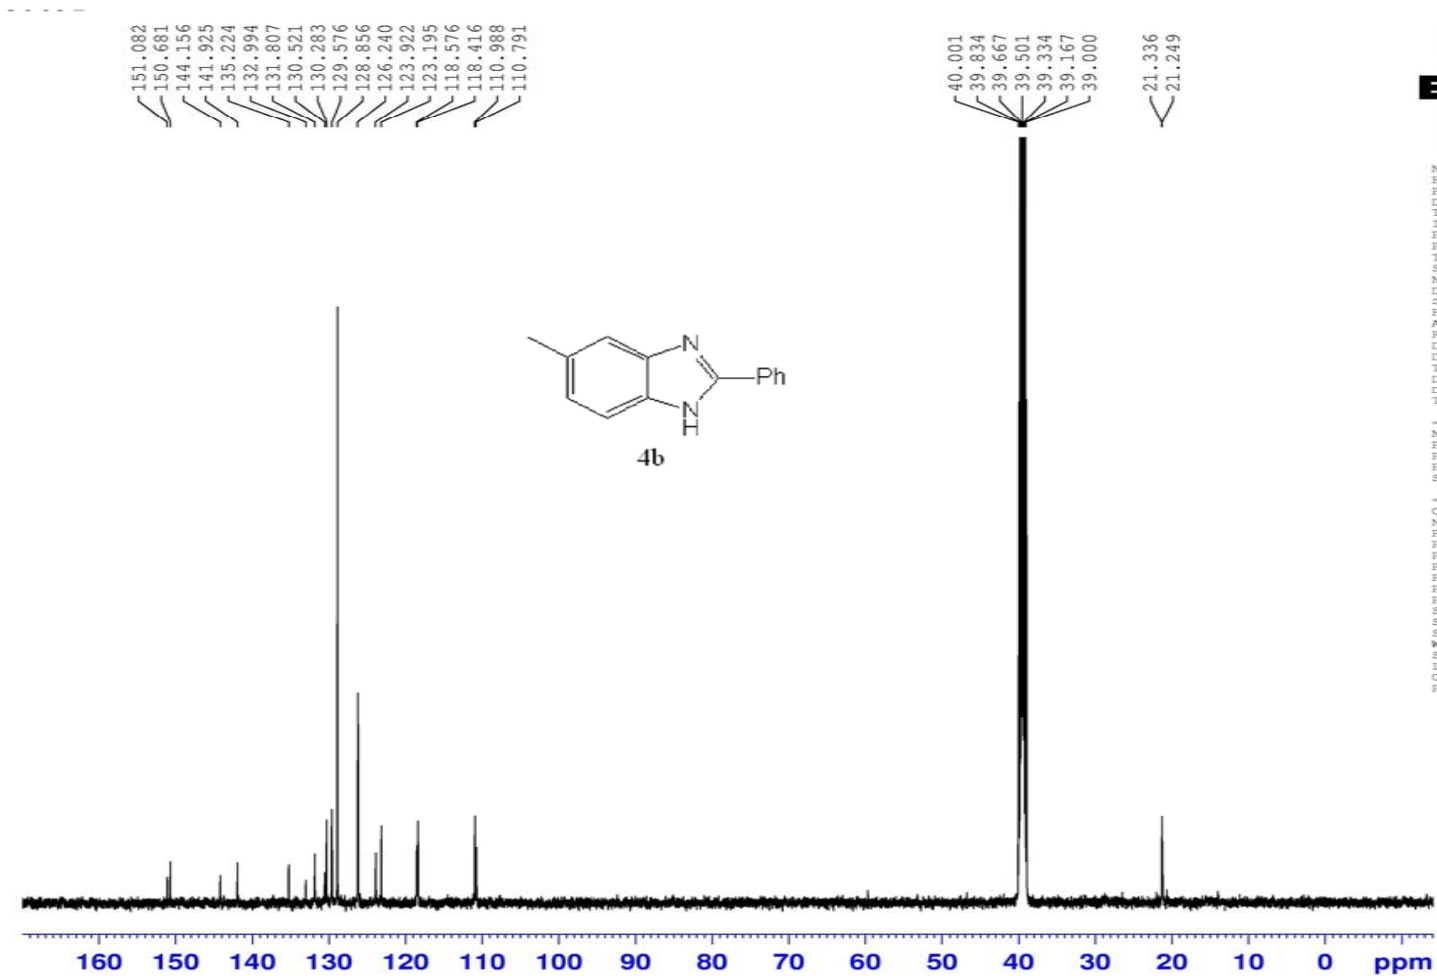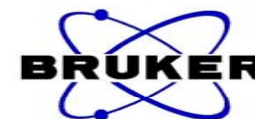

```
NAME          50691
EXPNO         1
PROCNO       1
Date_        20120524
Time         15.19
INSTRUM      Spect
PROBHD       5 mm PABBO BB-
PULPROG      zgpg30
TD           65536
SOLVENT      DMSO
NS           2435
DS           4
SWH          29761.904 Hz
FIDRES       0.454131 Hz
AQ           1.1010548 sec
RG           203
DW           16.800 usec
DE           6.50 usec
TE           297.7 K
D1           2.0000000 sec
D11          0.0300000 sec
TD0          1

----- CHANNEL f1 -----
NUC1          13C
P1            11.57 usec
PL1           0.00 dB
PL1W          83.39463043 W
SFO1          125.7703643 MHz

----- CHANNEL f2 -----
CPDPRG2      waltz16
NUC2          1H
PCPD2        80.00 usec
PL2           2.50 dB
PL12         17.40 dB
PL13         17.40 dB
PL2W         13.02359581 W
PL12W        0.42143536 W
PL13W        0.42143536 W
SFO2          500.1320005 MHz
SI            32768
SF           125.7578524 MHz
WDW           EM
SFB           0
LB            1.00 Hz
GB            0
PC            1.40
```

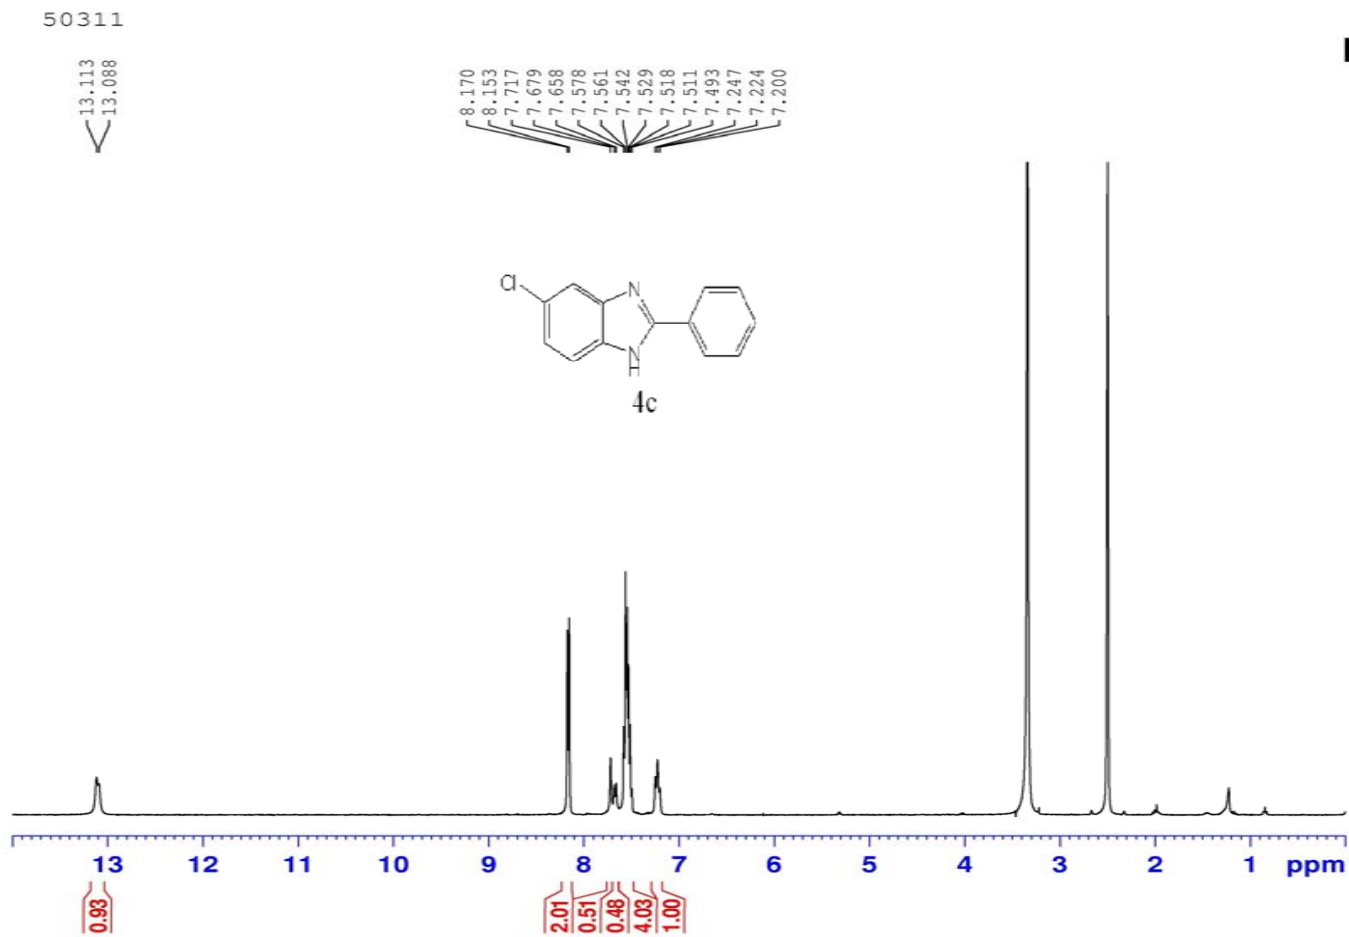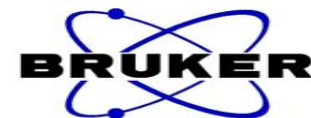

```
NAME          H ZI
EXPNO         39
PROCNO        1
Date_         20120529
Time          8.40
INSTRUM       spect
PROBHD        5 mm PABBO BB-
PULPROG       zg30
TD            65536
SOLVENT       DMSO
NS            16
DS            2
SWH           8278.146 Hz
FIDRES        0.126314 Hz
AQ            3.9584243 sec
RG            256
DW            60.400 usec
DE            6.50 usec
TE            673.2 K
D1            1.0000000 sec
D10           1
```

```
----- CHANNEL f1 -----
NUC1          1H
P1            14.50 usec
PL1           0.00 dB
PL1W         10.07646066 W
SFO1          400.1324710 MHz
SI            32768
SF            400.1300036 MHz
WDW           EM
SSB           0
LB            0.30 Hz
GB            0
PC            1.00
```

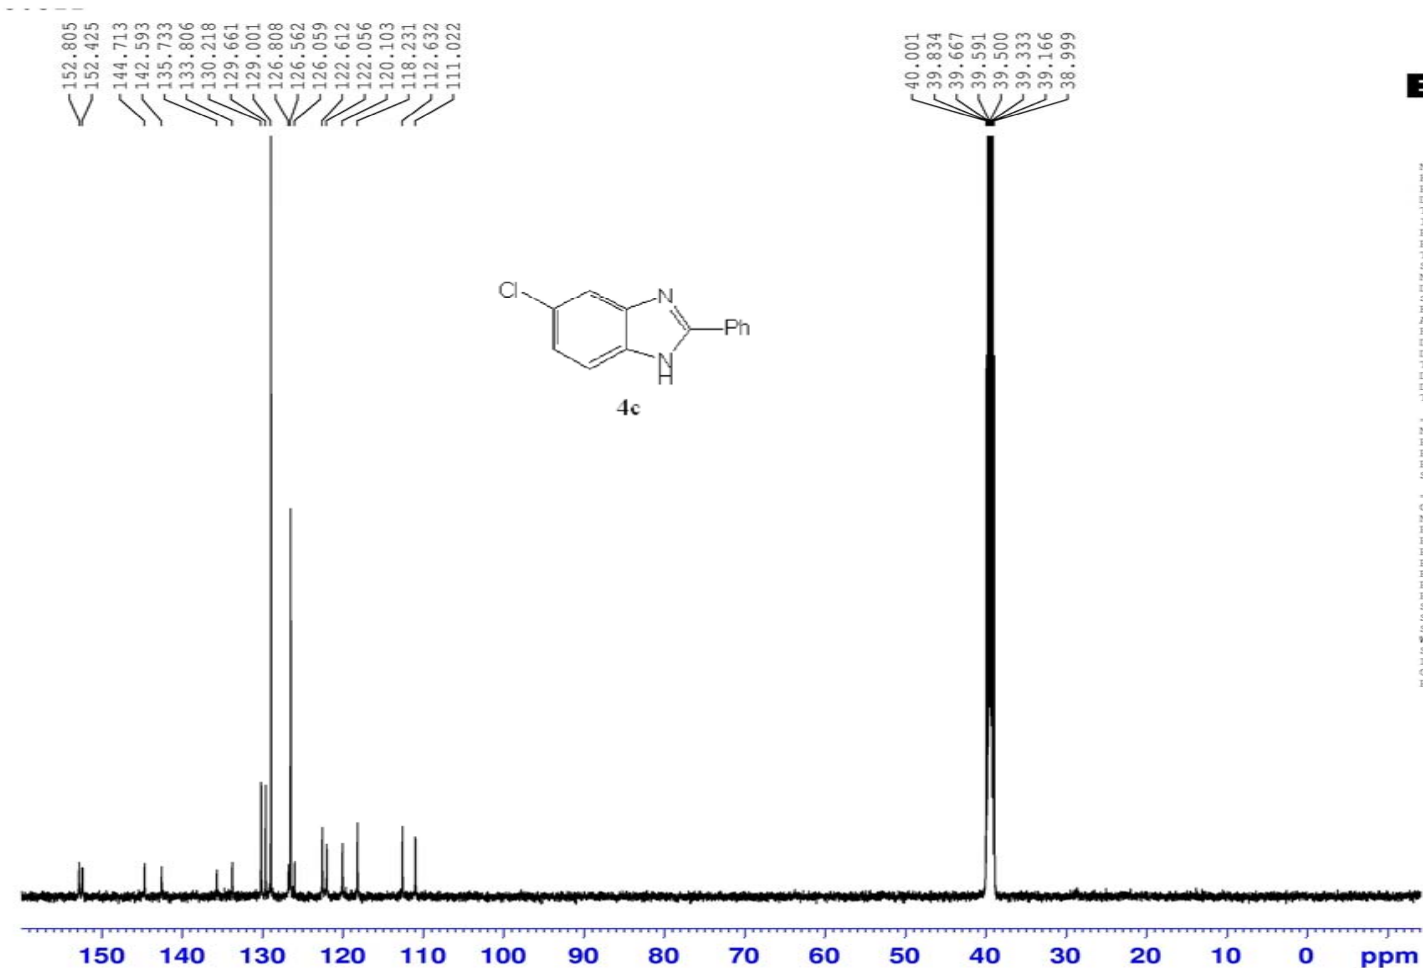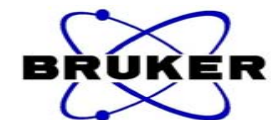

```
NAME          50311
EXPNO         1
PROCNO       1
Date_        20120529
Time         18.07
INSTRUM      Spect
PROBHD       5 mm PABBO BB-
PULPROG      zgpg30
TD           65536
SOLVENT      DMSO
NS           3721
DS           4
JMH         29761.994 Hz
FIDRES       0.454131 Hz
AQ           1.1010548 sec
RG           203
DW           16.800 usec
DE           6.50 usec
TE           297.1 K
D1           2.0000000 sec
D11          0.0300000 sec
TD0         1

----- CHANNEL f1 -----
NUC1         13C
P1           11.57 usec
PL1          0.00 dB
PL1W         83.39463043 W
SFO1         125.7703643 MHz

----- CHANNEL f2 -----
CPDPRG2      waltz16
NUC2         1H
PCPD2        80.00 usec
PL2          2.50 dB
PL12         17.40 dB
PL13         17.40 dB
PL2W         13.02359581 W
PL12W        0.42143536 W
PL13W        0.42143536 W
SFO2         500.1320005 MHz
SI           32768
SF           125.7578497 MHz
WDW          EM
SSB          0
LB           1.00 Hz
GB           0
PC           1.40
```

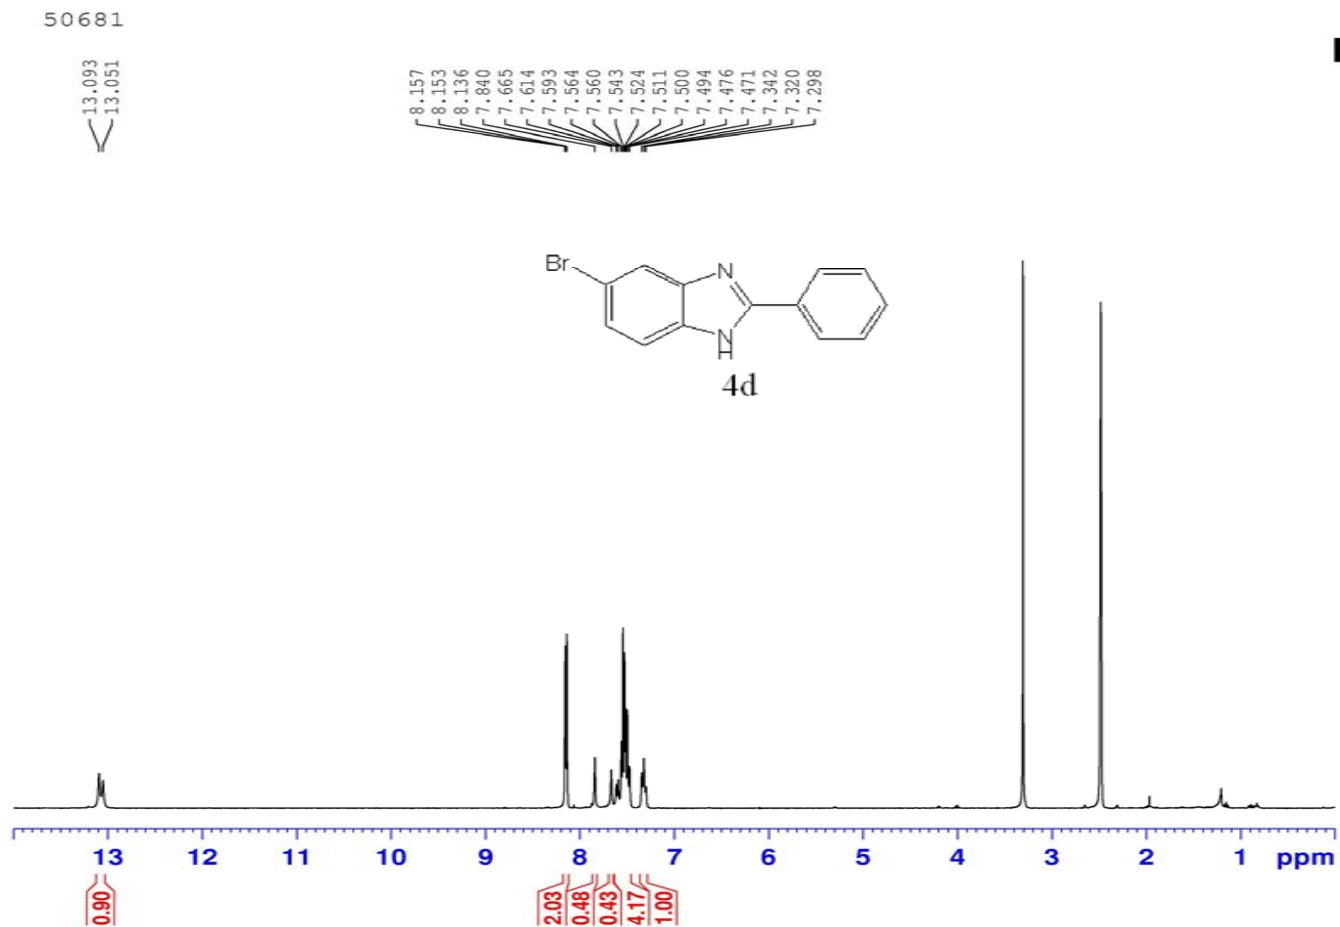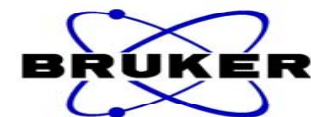

```
NAME          H 2I
EXPNO         35
PROCNO        1
Date_         20120523
Time          9.10
INSTRUM       spect
PROBHD        5 mm PABBO BB-
PULPROG       zg30
TD            65536
SOLVENT       DMSO
NS            16
DS            2
SWH           8278.146 Hz
FIDRES        0.126314 Hz
AQ            3.9584243 sec
RG            362
DW            60.400 usec
DE            6.50 usec
TE            673.2 K
D1            1.00000000 sec
TDO           1
```

```
----- CHANNEL f1 -----
NUC1          1H
P1            14.50 usec
PL1           0.00 dB
PL1W          10.87646966 W
SF01          400.1324710 MHz
SI            32768
SF            400.1300111 MHz
WDW           EM
SSB           0
LB            0.30 Hz
GB            0
PC            1.00
```

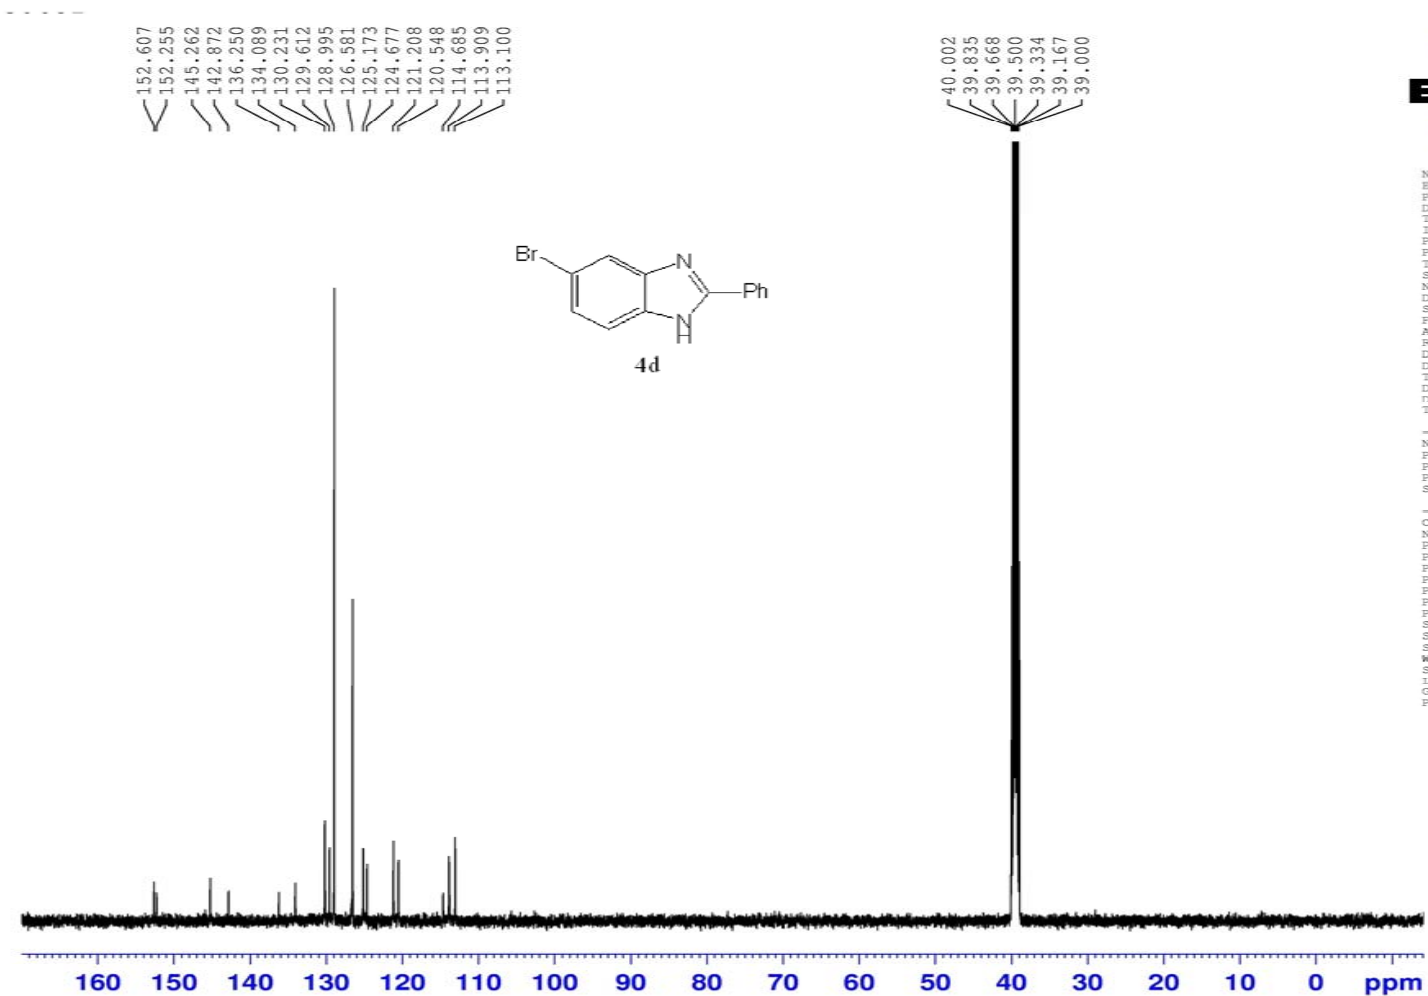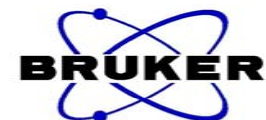

```
NAME          50681
EXPNO         1
PROCNO        1
Date_         20120524
Time          14.46
INSTRUM       Spect
PROBHD        5 mm PABBO BB-
PULPROG       zgpg30
TD            65536
SOLVENT       DMSO
NS            1024
DS            4
SWH           29761.904 Hz
FIDRES        0.454131 Hz
AQ            1.1010548 sec
RG            203
DW            16.800 usec
DE            6.50 usec
TE            297.0 K
D1            2.0000000 sec
D11           0.0300000 sec
TD0           1

----- CHANNEL f1 -----
NUC1          13C
P1            11.57 usec
PL1           0.00 dB
PL1W          83.39463043 W
SFO1          125.7703643 MHz

----- CHANNEL f2 -----
CPDPRG2       waltz16
NUC2          1H
PCPD2         80.00 usec
PL2           2.50 dB
PL12          17.40 dB
PL13          17.40 dB
PL2W          13.02359581 W
PL12W         0.42143536 W
PL13W         0.42143536 W
SFO2          500.1320005 MHz
SI            32768
SF            125.7578508 MHz
WDW           EM
SSB           0
LB            1.00 Hz
GB            0
PC            1.40
```
